# Supplementary material for: An Interlaboratory Comparison Study of Regulated and Emerging Mycotoxins Using Liquid Chromatography Mass Spectrometry: Challenges and Future Directions of Routine Multi-Mycotoxin Analysis including Emerging Mycotoxins
Source: MDPI journal article supplement (doi:10.3390/toxins14060405), 2022-06-13
Supplement: s1 [file s1]

# Supplementary Material: An Interlaboratory Comparison Study of Regulated and Emerging Mycotoxins Using Liquid Chromatography Mass Spectrometry: Challenges and Future Directions of Routine Multi-Mycotoxin Analysis Including Emerging Mycotoxins

David Steiner, Armin Humpel, Eleonore Stamminger, Anna Schoeberl, Gerlinde Pachschwoell, Anita Sloboda, Christy Swoboda, Jolene Rigg, Dawei Zhang, Yahong Wang, Joshua Davis, Michael Sulyok, Rudolf Krska, Brian Quinn, Brett Greer, Christopher T. Elliott, Zbynek Dzuman, Jana Hajslova, Andreas Gschaider, Carina Fechner, Lisa Forstner, Elisabeth Varga, Piotr Jedziniak, Katarzyna Pietruszka, Adrianna Rudawska and Alexandra Malachová

## Table of Contents

|                                                                       |           |
|-----------------------------------------------------------------------|-----------|
| <b>1. Overview of tested analytes .....</b>                           | <b>3</b>  |
| 1.1. Summary of positive findings.....                                | 3         |
| <b>2. Matrix specific concentration ranges .....</b>                  | <b>5</b>  |
| 2.1. Concentration range in soy matrices.....                         | 5         |
| 2.2. Concentration range in corn gluten matrices .....                | 6         |
| 2.3. Concentration range in chicken feed matrices.....                | 7         |
| 2.4. Concentration range in swine feed matrices.....                  | 8         |
| <b>3. Analyte specific z-score performance .....</b>                  | <b>9</b>  |
| 3.1. Overview of individual z-score data for soy matrix.....          | 10        |
| 3.2. Overview of individual z-score data for corn gluten matrix.....  | 15        |
| 3.3. Overview of individual z-score data for chicken feed matrix..... | 20        |
| 3.4. Overview of individual z-score data for swine feed matrix.....   | 25        |
| <b>4. Overview of z-score deviations.....</b>                         | <b>30</b> |
| <b>5. Regulatory framework of the European Union .....</b>            | <b>31</b> |
| <b>6. Control Standard Solutions .....</b>                            | <b>32</b> |
| <b>7. Lab specific methodology .....</b>                              | <b>33</b> |

## 1. Overview of tested analytes

**Table S1:** Overview of the target compound list for the interlaboratory comparison study. The columns include the name of the compound (analyte), the typical abbreviation (abbr.) and an indication which compounds has been included into the testing scheme of the individual participant.

| ANALYTE                    | ABBR     | LAB<br>001         | LAB<br>002 | LAB<br>003 | LAB<br>004 | LAB<br>005 | LAB<br>006 | LAB<br>007 | LAB<br>008 | LAB<br>009* |
|----------------------------|----------|--------------------|------------|------------|------------|------------|------------|------------|------------|-------------|
|                            |          | compound<br>tested |            |            |            |            |            |            |            |             |
| Aflatoxin B1               | AFB1     | yes                | yes        | yes        | yes        | yes        | yes        | yes        | yes        | yes         |
| Aflatoxin B2               | AFB2     | yes                | yes        | yes        | yes        | yes        | yes        | yes        | yes        | yes         |
| Aflatoxin G1               | AFG1     | yes                | yes        | yes        | yes        | yes        | yes        | yes        | yes        | yes         |
| Aflatoxin G2               | AFG2     | yes                | yes        | yes        | yes        | yes        | yes        | yes        | yes        | yes         |
| Deoxynivalenol             | DON      | yes                | yes        | yes        | yes        | yes        | yes        | yes        | yes        | yes         |
| Fumonisin B1               | FB1      | yes                | yes        | yes        | yes        | yes        | yes        | yes        | yes        | yes         |
| Fumonisin B2               | FB2      | yes                | yes        | yes        | yes        | yes        | yes        | yes        | yes        | yes         |
| HT-2 Toxin                 | HT-2     | yes                | yes        | yes        | yes        | yes        | yes        | yes        | yes        | yes         |
| Ochratoxin A               | OTA      | yes                | yes        | yes        | yes        | yes        | yes        | yes        | yes        | yes         |
| T-2 Toxin                  | T-2      | yes                | yes        | yes        | yes        | yes        | yes        | yes        | yes        | yes         |
| Zearalenone                | ZEN      | yes                | yes        | yes        | yes        | yes        | yes        | yes        | yes        | yes         |
| 15-Acetyldeoxynivalenol    | 15-AcDON | yes                | yes        | no         | yes        | yes        | no         | no         | yes        | yes         |
| 3-Acetyldeoxynivalenol     | 3-AcDON  | yes                | yes        | no         | yes        | yes        | no         | no         | yes        | yes         |
| Alternariol                | AOH      | yes                | yes        | no         | yes        | yes        | yes        | no         | yes        | yes         |
| Beauvericin                | BEA      | yes                | yes        | no         | yes        | yes        | yes        | no         | yes        | yes         |
| Deoxynivalenol-3-Glucoside | D3G      | yes                | yes        | no         | yes        | yes        | no         | no         | no         | yes         |
| Enniatin A                 | ENN-A    | yes                | yes        | no         | yes        | yes        | yes        | no         | yes        | yes         |
| Enniatin A1                | ENN-A1   | yes                | yes        | no         | yes        | yes        | yes        | no         | yes        | yes         |
| Enniatin B                 | ENN-B    | no                 | yes        | no         | no         | yes        | yes        | no         | yes        | yes         |
| Enniatin B1                | ENN-B1   | yes                | yes        | no         | yes        | yes        | yes        | no         | yes        | yes         |
| Fumonisin B3               | FB3      | yes                | yes        | no         | yes        | yes        | no         | no         | no         | yes         |
| Moniliformin               | MON      | yes                | yes        | no         | yes        | yes        | no         | no         | yes        | no          |
| Nivalenol                  | NIV      | yes                | yes        | no         | yes        | yes        | yes        | no         | yes        | yes         |
| Ochratoxin B               | OTB      | yes                | yes        | no         | yes        | yes        | yes        | no         | yes        | yes         |

\*Lab 009 provided an additional data set which is listed as lab 010

Five laboratories tested for 62 – 92% (19 – 23) of all compounds and only two laboratories did not include any non-regulated mycotoxins in their testing scope. Furthermore, 4 participants provided results for 46 – 100% of analytes which complied with the accreditation requirements of ISO 17025. Based on a low number of quantitative results, a statistical analysis for AFB2, AFG2 in all 4 matrix commodities as well as AFG1 in chicken feed, OTB in swine feed, corn gluten and soy, NIV in chicken feed, corn gluten and soy and 15-AcDON, 3-AcDON, D3G, FB1, FB2 and FB3 in soy was not feasible. Some participants reported results lower their individual reporting and detection limits, which was especially true for aflatoxins and ochratoxin A. However, these results were excluded for the final statistical calculation.

### 1.1. Summary of positive findings

In total, 6712 quantitative results were reported for all analyte/matrix combinations. For statistical calculation 6018 results (89.7%) were used, whereby 3075 results were related to the group of non- regulated and 2943 to the group of regulated mycotoxins.

The highest positive rate of quantitative results (> LOQ) for all analytes was observed in corn gluten samples with 2081 positive findings out of 4800 possible events which results in a 43.4% overall contamination rate. This is followed by chicken feed with 1940 (39.6%), swine feed with 1859 (38.7%) and soy with 832 (17.3%) total positive findings. Amongst the regulated mycotoxins, ZEN, FB1 and DON were the most prevalent representatives with 629 (78.6%), 519 (69.5%) and 513 (64.9%) reported quantitative results. The fewest positive findings were observed for aflatoxins with 124 (15.5%) reported results for AFB1, 46 (5.8%)

for AFG1, 11 (1.4%) for AFB2 and 5 (0.6%) for AFG2. Quantitative results for the remaining regulated mycotoxins accounted 480 (60.0%) for FB2, 401 (50.1%) for T-2 toxin, 316 (39.5%) for HT-2 toxin, 291 (36.4%) for OTA and 162 (20.3%) for FB3.

The highest contamination rate for non-regulated mycotoxins was observed for BEA with 556 (69.5%), ENN-B with 501 (62.6%) and ENN-B1 with 483 (60.4%) quantitative reported results. Moderate findings were made for AOH with 337 (42.1%), ENN-A1 with 335 (41.9%), 15-AcDON with 226 (28.3%), MON with 222 (27.8%) and ENN-A with 190 (23.8%) reported quantitative data. The lowest quantitative dataset was reported for D3G with 134 (16.8%), 3-AcDON with 126 (15.8%), NIV with 63 (7.9%) and OTB with 42 (5.3%) of positive results.

## 2. Matrix specific concentration ranges

### 2.1. Concentration range in soy matrices

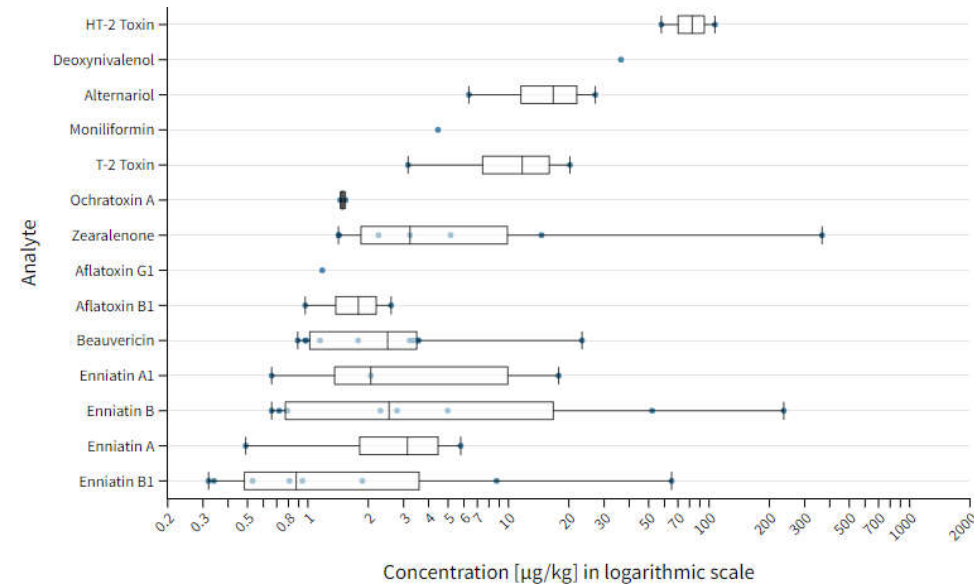

**Figure S1:** Graphical illustration of H15-mean based concentration ranges in soy matrix. The x-axis represents the concentration range for the specific assigned values in µg/kg in a logarithmic scale. The y-axis shows the individual target compounds.

**Table S2:** Analyte specific H15-mean based concentration range for 10 individual soy matrix lots.

[illegible]

## 2.2. Concentration range in corn gluten matrices

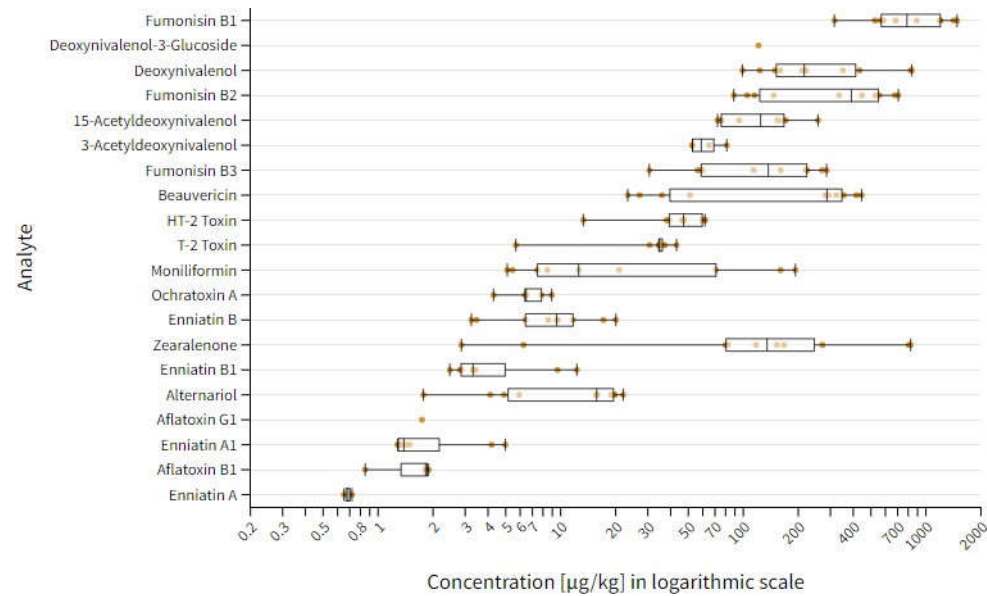

**Figure S2:** Graphical illustration of H15-mean based concentration ranges in corn gluten matrix. The x-axis represents the concentration range for the specific assigned values in µg/kg in a logarithmic scale. The y-axis shows the individual target compounds.

**Table S3:** Analyte specific H15-mean based concentration range for 10 individual corn gluten matrix lots.

| Lot | 15-AcDON | 3-AcDON | AFB1 | AFB2 | AFG1 | AFG2 | AO H | BEA  | D3G   | DON  | ENN-A | ENN-A1 | ENN-B | ENN-B1 | FB1  | FB2  | FB3  | HT-2 | MON  | NIV | OTA  | OTB | T-2  | ZEN  |
|-----|----------|---------|------|------|------|------|------|------|-------|------|-------|--------|-------|--------|------|------|------|------|------|-----|------|-----|------|------|
| 1   | 166      | 65.0    | -    | -    | -    | -    | 15.6 | 416  | -     | 351  | 0.72  | 4.98   | 20.1  | 12.3   | 891  | 447  | 160  | 39.3 | 20.9 | -   | 4.29 | -   | 34.8 | 825  |
| 2   | 154      | 52.7    | -    | -    | -    | -    | 15.9 | 445  | -     | 433  | 0.65  | 4.18   | 17.1  | 9.61   | 683  | 335  | 114  | 38.0 | 12.5 | -   | 8.93 | -   | 35.9 | 805  |
| 3   | 171      | 52.8    | -    | -    | -    | -    | 4.11 | 51.1 | -     | 837  | -     | -      | -     | -      | 564  | 147  | 59.7 | 13.3 | 70.9 | -   | -    | -   | 5.68 | 79.8 |
| 4   | -        | -       | 1.82 | -    | -    | -    | 5.92 | 27.1 | -     | 210  | -     | 1.49   | 3.46  | 2.81   | 585  | 115  | 58.6 | 59.6 | 160  | -   | 6.47 | -   | 30.7 | 6.26 |
| 5   | 257      | 81.2    | -    | -    | -    | -    | 1.77 | 23.3 | 121.1 | 826  | -     | -      | 6.42  | -      | 315  | 88.7 | 30.6 | -    | 5.45 | -   | -    | -   | -    | 82.2 |
| 6   | 74.9     | -       | 0.85 | -    | -    | -    | 18.9 | 293  | -     | 98.9 | -     | 1.35   | 8.55  | 3.32   | 1203 | 555  | 224  | 47.4 | 5.10 | -   | 7.85 | -   | 36.0 | 117  |
| 7   | 94.8     | -       | -    | -    | -    | -    | 19.8 | 282  | -     | 123  | -     | 1.29   | 11.7  | 3.42   | 1189 | 531  | 220  | 61.7 | -    | -   | -    | -   | 43.1 | 271  |
| 8   | 72.3     | -       | -    | -    | -    | -    | 19.6 | 355  | -     | 159  | -     | 1.42   | 9.63  | 3.31   | 1481 | 706  | 286  | 47.1 | 8.44 | -   | -    | -   | 34.6 | 167  |
| 9   | 76.0     | -       | -    | -    | -    | -    | 22.0 | 323  | -     | 149  | -     | 1.28   | 9.51  | 2.86   | 1417 | 677  | 270  | 46.3 | 7.45 | -   | -    | -   | 37.2 | 153  |
| 10  | -        | -       | 1.89 | -    | 1.74 | -    | 4.90 | 35.8 | -     | 221  | -     | 1.29   | 3.24  | 2.47   | 526  | 105  | 56.2 | 61.6 | 193  | -   | 6.37 | -   | 34.4 | 2.86 |

### 2.3. Concentration range in chicken feed matrices

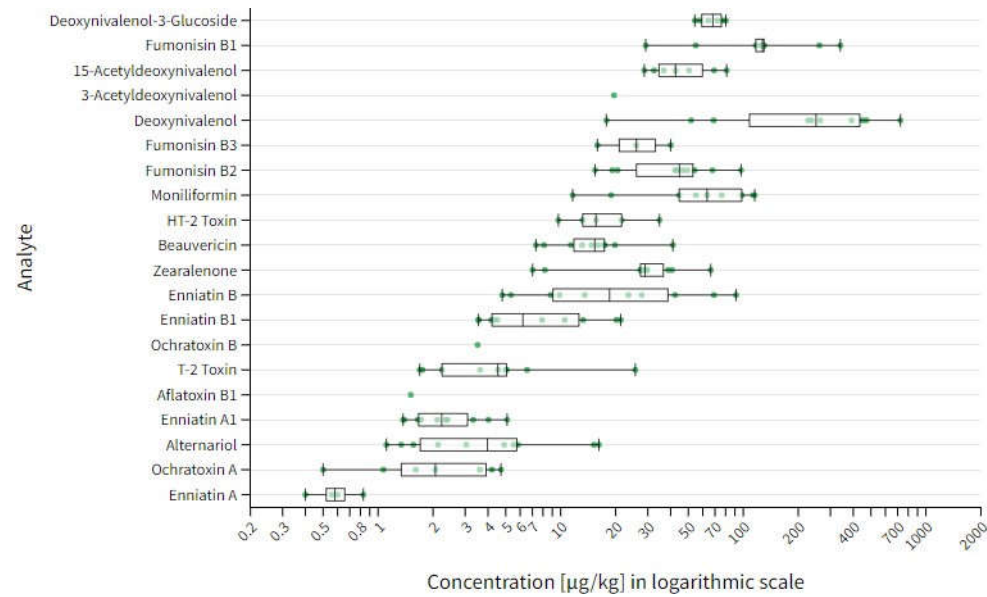

**Figure S3:** Graphical illustration of H15-mean based concentration ranges in chicken feed matrix. The x-axis represents the concentration range for the specific assigned values in µg/kg in a logarithmic scale. The y-axis shows the individual target compounds.

**Table S4:** Analyte specific H15-mean based concentration range for 10 individual chicken feed matrix lots.

| Lot | 15-AcDON | 3-AcDON | AFB1 | AFB2 | AFG1 | AFG2 | AO H | BEA  | D3G  | DON  | ENN-A | ENN-A1 | ENN-B | ENN-B1 | FB1  | FB2  | FB3  | HT-2 | MON  | NIV | OTA  | OTB  | T-2  | ZEN  |
|-----|----------|---------|------|------|------|------|------|------|------|------|-------|--------|-------|--------|------|------|------|------|------|-----|------|------|------|------|
| 1   | 36.7     | -       | -    | -    | -    | -    | 15.2 | 11.4 | 54.3 | 449  | 0.56  | 2.40   | 27.8  | 10.5   | 130  | 43.0 | -    | 34.7 | 44.6 | -   | 4.20 | -    | 25.6 | 40.7 |
| 2   | -        | -       | -    | -    | -    | -    | 2.13 | 8.10 | -    | 68.8 | 0.83  | 5.09   | 69.0  | 20.2   | 29.2 | 19.2 | -    | -    | 18.9 | -   | -    | -    | 4.53 | 8.19 |
| 3   | -        | -       | -    | -    | -    | -    | 1.11 | 14.8 | -    | 51.8 | 0.60  | 4.02   | 91.3  | 21.3   | -    | 15.4 | -    | -    | 11.6 | -   | 4.71 | 3.51 | 2.24 | 29.6 |
| 4   | 81.1     | -       | 1.51 | -    | -    | -    | 5.83 | 41.2 | 64.3 | 725  | -     | 3.32   | 42.3  | 13.3   | 130  | 42.4 | 15.9 | 21.6 | 63.3 | -   | 0.50 | -    | 6.54 | 66.3 |
| 5   | 69.2     | 19.6    | -    | -    | -    | -    | 5.53 | 19.8 | -    | 264  | 0.40  | 2.35   | 23.5  | 7.92   | 54.9 | 20.5 | -    | 15.6 | -    | -   | -    | -    | 3.62 | 38.7 |
| 6   | 32.4     | -       | -    | -    | -    | -    | 4.90 | 13.1 | 77.1 | 237  | -     | 2.11   | 8.81  | 4.50   | 261  | 67.9 | 26.0 | -    | 55.0 | -   | -    | -    | 1.69 | 29.7 |
| 7   | 28.7     | -       | -    | -    | -    | -    | 3.04 | 17.4 | 71.9 | 226  | -     | 1.72   | 5.34  | 3.56   | 340  | 97.3 | 40.1 | -    | 113  | -   | 1.61 | -    | 1.75 | 27.3 |
| 8   | 42.6     | -       | -    | -    | -    | -    | 1.34 | 16.0 | 57.6 | 392  | -     | 1.39   | 9.84  | 4.17   | 117  | 46.5 | -    | 13.2 | 98.1 | -   | 3.61 | -    | 5.06 | 28.4 |
| 9   | 50.4     | -       | -    | -    | -    | -    | 1.56 | 17.3 | 80.3 | 472  | -     | 1.65   | 13.5  | 4.31   | 127  | 49.4 | -    | 9.71 | 116  | -   | 2.06 | -    | 4.99 | 27.5 |
| 10  | -        | -       | -    | -    | -    | -    | 16.2 | 7.32 | -    | 17.8 | -     | 1.37   | 4.79  | 3.54   | 126  | 54.2 | -    | -    | 76.1 | -   | 1.07 | -    | -    | 7.01 |

## 2.4. Concentration range in swine feed matrices

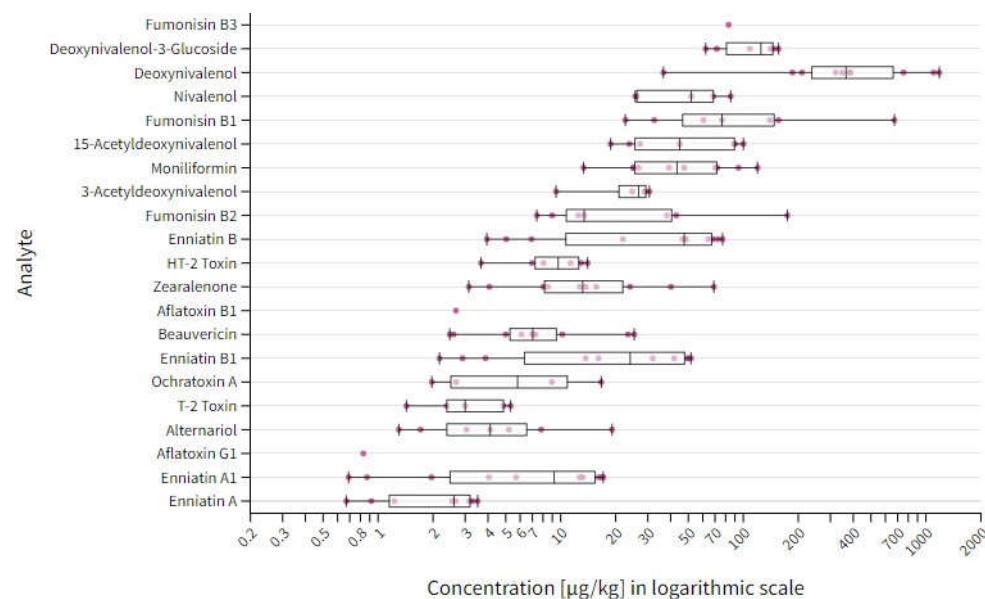

**Figure S4:** Graphical illustration of H15-mean based concentration ranges in swine feed matrix. The x-axis represents the concentration range for the specific assigned values in µg/kg in a logarithmic scale. The y-axis shows the individual target compounds.

**Table S5:** Analyte specific H15-mean based concentration range for 10 individual swine feed matrix lots.

| Lot | 15-AcDON | 3-AcDON | AFB1 | AFB2 | AFG1 | AFG2 | AO H | BEA  | D3G  | DON  | ENN-A | ENN-A1 | ENN-B | ENN-B1 | FB1  | FB2  | FB3  | HT-2 | MON  | NIV  | OTA  | OTB | T-2  | ZEN  |
|-----|----------|---------|------|------|------|------|------|------|------|------|-------|--------|-------|--------|------|------|------|------|------|------|------|-----|------|------|
| 1   | -        | -       | -    | -    | -    | -    | 1.71 | 5.00 | -    | 36.5 | 0.67  | 1.96   | 3.94  | 3.88   | 140  | 42.9 | -    | -    | 94.1 | -    | 16.7 | -   | 1.43 | 4.07 |
| 2   | -        | -       | -    | -    | -    | -    | 5.21 | 7.28 | -    | 186  | 2.55  | 13.2   | 64.4  | 41.8   | 22.6 | 7.40 | -    | 14.0 | 26.7 | 68.5 | -    | -   | 5.32 | 12.7 |
| 3   | 18.8     | -       | -    | -    | -    | -    | 19.1 | 10.2 | -    | 210  | 3.16  | 16.8   | 72.9  | 49.7   | 32.5 | 8.98 | -    | 13.0 | 25.0 | 85.3 | -    | -   | 4.86 | 15.7 |
| 4   | -        | -       | -    | -    | -    | -    | 7.82 | 6.10 | 109  | 386  | 3.51  | 17.1   | 77.0  | 51.7   | 60.5 | 12.5 | -    | 8.05 | 39.3 | -    | 1.97 | -   | 2.38 | 24.0 |
| 5   | 89.0     | 28.8    | -    | -    | -    | -    | 4.11 | 6.99 | 156  | 1185 | 3.27  | 16.2   | 68.2  | 50.0   | 76.5 | 13.4 | -    | 6.98 | 47.4 | -    | -    | -   | -    | 40.1 |
| 6   | 100      | 30.6    | -    | -    | -    | -    | 1.30 | 25.3 | 147  | 1102 | 2.66  | 12.7   | 48.5  | 31.9   | 156  | 38.2 | -    | 11.3 | 72.1 | 25.6 | 8.94 | -   | 3.00 | 69.0 |
| 7   | 27.2     | 9.43    | 2.67 | -    | 0.83 | -    | 3.05 | 7.08 | -    | 321  | 1.23  | 5.69   | 21.9  | 13.7   | 673  | 174  | 83.1 | -    | 70.2 | 26.1 | 2.68 | -   | -    | 13.7 |
| 8   | 90.0     | 24.7    | -    | -    | -    | -    | -    | 2.59 | 141  | 755  | -     | 0.69   | 5.03  | 2.17   | -    | -    | -    | -    | 25.0 | -    | -    | -   | -    | 8.51 |
| 9   | 23.8     | -       | -    | -    | -    | -    | -    | 2.47 | 62.2 | 348  | -     | 0.87   | 6.92  | 2.90   | -    | -    | -    | -    | 13.4 | -    | -    | -   | -    | 3.14 |
| 10  | 44.9     | -       | -    | -    | -    | -    | -    | 23.4 | 71.6 | 382  | 0.92  | 4.04   | 46.4  | 16.1   | -    | -    | -    | 3.66 | 120  | 51.9 | -    | -   | -    | 8.04 |

### 3. Analyte specific z-score performance

Within the category of regulated mycotoxins, ZEN, T-2 toxin, AFB1 and HT-2 toxin showed with 79.7%, 78.9%, 77.1% and 76.9% respectively a higher performance compared to the total average acceptable z-score result observed for this group. On the other hand, the performance of FB1 (68.1%), FB2 (63.8%), AFG1 (63.3%), DON (63.3%) and OTA (51.0%) was lower compared to the average value of 69.1% for this class. Amongst the group of non-regulated mycotoxins, FB3 with 93.2%, ENN-A with 88.4%, ENN-B1 with 76.7%, NIV with 75.6%, D3G with 73.9% and ENN-A1 with 72.9% were above the average performance of 70.4% in this category while MON with 67.8%, BEA with 65.3%, ENN-B with 64.8%, 15-AcDON with 64.5%, AOH with 61.6%, OTB with 50.0% and 3-AcDON with 49.4% were lower. However, for some of the compounds for both groups (regulated and non-regulated mycotoxins) with a higher performance compared to the overall average in the respective category, the number of statistical evaluable data points was rather low (e.g., AFB1 with 71, NIV with 41 or D3G with 106) compared to more prevalent toxins showing a lower performance.



### 3.1. Overview of individual z-score data for soy matrix

**Table S6:** Summary of z-score performance of 10 soy matrices. Acceptable, questionable and unacceptable z-scores are colored in green, yellow and red respectively. No-stat information refers to positive findings where a z-score calculation was not feasible due to a reduced number of reported results.

| Lab Code | ISTD | Where a score calculation was not possible due to a reduced number of peaks detected |         |      |      |      |      |     |      |     |         |       |         |       |        |         |         |         |         |         |     |         |     |         |         |  |
|----------|------|--------------------------------------------------------------------------------------|---------|------|------|------|------|-----|------|-----|---------|-------|---------|-------|--------|---------|---------|---------|---------|---------|-----|---------|-----|---------|---------|--|
|          |      | 15-AcDON                                                                             | 3-AcDON | AFB1 | AFB2 | AFG1 | AFG2 | AOH | BEA  | D3G | DON     | ENN-A | ENN-A1  | ENN-B | ENN-B1 | FB1     | FB2     | FB3     | HT-2    | MON     | NIV | OTA     | OTB | T-2     | ZEN     |  |
|          |      | Lot 1                                                                                |         |      |      |      |      |     |      |     |         |       |         |       |        |         |         |         |         |         |     |         |     |         |         |  |
| Lab 1    | yes  | -                                                                                    | -       | -    | -    | -    | -    | -   | -    | -   | -       | -     | -       | -     | -      | -       | -       | -       | -       | -       | -   | -       | -   | -       | -       |  |
| Lab 1    | yes  | -                                                                                    | -       | -    | -    | -    | -    | -   | -    | -   | -       | -     | -       | -     | -      | -       | -       | -       | -       | -       | -   | -       | -   | -       | -       |  |
| Lab 2    | no   | -                                                                                    | -       | -    | -    | -    | -    | -   | -1.9 | -   | -       | -     | -       | -1.9  | -0.4   | -       | -       | -       | -       | no stat | -   | -       | -   | -       | -       |  |
| Lab 2    | no   | -                                                                                    | -       | -    | -    | -    | -    | -   | -0.4 | -   | -       | -     | -       | -0.9  | 1.0    | -       | -       | -       | -       | no stat | -   | -       | -   | -       | -       |  |
| Lab 3    | yes  | -                                                                                    | -       | -    | -    | -    | -    | -   | -    | -   | no stat | -     | -       | -     | -      | no stat | no stat | -       | no stat | -       | -   | no stat | -   | no stat | no stat |  |
| Lab 3    | yes  | -                                                                                    | -       | -    | -    | -    | -    | -   | -    | -   | no stat | -     | -       | -     | -      | no stat | no stat | -       | no stat | -       | -   | no stat | -   | no stat | no stat |  |
| Lab 4    | yes  | -                                                                                    | -       | -    | -    | -    | -    | -   | 16.6 | -   | -       | -     | -       | 0.2   | 0.1    | -       | -       | -       | -       | -       | -   | -       | -   | -       | -       |  |
| Lab 4    | yes  | -                                                                                    | -       | -    | -    | -    | -    | -   | 16.3 | -   | -       | -     | -       | 0.2   | -0.5   | -       | -       | -       | -       | -       | -   | -       | -   | -       | -       |  |
| Lab 5    | yes  | -                                                                                    | -       | -    | -    | -    | -    | -   | 1.8  | -   | -       | -     | -       | -     | -      | -       | -       | -       | -       | -       | -   | -       | -   | -       | -       |  |
| Lab 5    | yes  | -                                                                                    | -       | -    | -    | -    | -    | -   | 0.8  | -   | -       | -     | -       | 7.7   | -      | -       | -       | -       | -       | -       | -   | -       | -   | -       | -       |  |
| Lab 6    | no   | -                                                                                    | -       | -    | -    | -    | -    | -   | -2.0 | -   | -       | -     | no stat | 2.4   | 1.4    | -       | no stat | -       | -       | -       | -   | -       | -   | -       | -       |  |
| Lab 6    | no   | -                                                                                    | -       | -    | -    | -    | -    | -   | -1.0 | -   | -       | -     | no stat | 5.2   | 8.2    | -       | no stat | no stat | -       | -       | -   | -       | -   | -       | -       |  |
| Lab 7    | yes  | -                                                                                    | -       | -    | -    | -    | -    | -   | -    | -   | no stat | -     | -       | -     | -      | -       | -       | -       | -       | -       | -   | -       | -   | -       | -       |  |
| Lab 7    | yes  | -                                                                                    | -       | -    | -    | -    | -    | -   | -    | -   | no stat | -     | -       | -     | -      | -       | -       | -       | -       | -       | -   | -       | -   | -       | -       |  |
| Lab 8    | no   | no stat                                                                              | no stat | -    | -    | -    | -    | -   | -2.4 | -   | no stat | -     | -       | -     | -      | no stat | no stat | -       | no stat | -       | -   | -       | -   | -       | -       |  |
| Lab 8    | no   | no stat                                                                              | no stat | -    | -    | -    | -    | -   | -4.2 | -   | -       | -     | -       | -     | -      | no stat | no stat | -       | no stat | -       | -   | -       | -   | -       | -       |  |
| Lab 9    | no   | -                                                                                    | -       | -    | -    | -    | -    | -   | 1.1  | -   | -       | -     | -       | -0.1  | 0.0    | -       | -       | -       | -       | -       | -   | -       | -   | -       | no stat |  |
| Lab 9    | no   | -                                                                                    | -       | -    | -    | -    | -    | -   | 0.4  | -   | -       | -     | -       | -0.5  | -0.1   | -       | -       | -       | -       | -       | -   | -       | -   | -       | no stat |  |
| Lab 10   | no   | -                                                                                    | -       | -    | -    | -    | -    | -   | -0.2 | -   | -       | -     | -       | -0.3  | -0.2   | -       | -       | -       | -       | -       | -   | -       | -   | -       | no stat |  |
| Lab 10   | no   | -                                                                                    | -       | -    | -    | -    | -    | -   | 0.5  | -   | -       | -     | -       | -0.3  | -0.2   | -       | -       | -       | -       | -       | -   | -       | -   | -       | no stat |  |

| Lab Cod e | ISTD | 15-AcDON | 3-AcDON | AFB1 | AFB2    | AFG1 | AFG2 | AOH     | BEA  | D3G | DON     | ENN-A | ENN-A1 | ENN-B | ENN-B1 | FB1     | FB2     | FB3 | HT-2    | MON | NIV | OTA  | OTB     | T-2     | ZEN     |
|-----------|------|----------|---------|------|---------|------|------|---------|------|-----|---------|-------|--------|-------|--------|---------|---------|-----|---------|-----|-----|------|---------|---------|---------|
|           |      | Lot 2    |         |      |         |      |      |         |      |     |         |       |        |       |        |         |         |     |         |     |     |      |         |         |         |
| Lab 1     | yes  | -        | -       | -    | -       | -    | -    | -       | -    | -   | -       | -     | -      | -     | -      | -       | -       | -   | -       | -   | -   | -    | -       | -       | -       |
| Lab 1     | yes  | -        | -       | -    | -       | -    | -    | -       | -    | -   | -       | -     | -      | -     | -      | -       | -       | -   | -       | -   | -   | -    | -       | -       | -       |
| Lab 2     | no   | -        | -       | -2.7 | -       | -    | -    | -       | 0.1  | -   | -       | -     | -      | -     | -      | -       | -       | -   | -       | -   | -   | -    | -       | -       | -       |
| Lab 2     | no   | -        | -       | -2.0 | -       | -    | -    | -       | -3.5 | -   | -       | -     | -      | -     | -      | -       | -       | -   | -       | -   | -   | -    | -       | -       | -       |
| Lab 3     | yes  | -        | -       | -2.2 | -       | -    | -    | -       | -    | -   | no stat | -     | -      | -     | -      | no stat | no stat | -   | no stat | -   | -   | -3.0 | -       | no stat | no stat |
| Lab 3     | yes  | -        | -       | -1.8 | -       | -    | -    | -       | -    | -   | no stat | -     | -      | -     | -      | no stat | no stat | -   | no stat | -   | -   | -2.9 | -       | no stat | no stat |
| Lab 4     | yes  | -        | -       | -    | -       | -    | -    | -       | 12.5 | -   | -       | -     | -      | -     | -      | -       | -       | -   | -       | -   | -   | -    | -       | -       | -       |
| Lab 4     | yes  | -        | -       | -    | -       | -    | -    | -       | 12.3 | -   | -       | -     | -      | -     | -      | -       | -       | -   | -       | -   | -   | -    | -       | -       | -       |
| Lab 5     | yes  | -        | -       | -0.7 | -       | -    | -    | -       | -0.3 | -   | -       | -     | -      | -     | -      | -       | -       | -   | -       | -   | -   | -    | -       | -       | -       |
| Lab 5     | yes  | -        | -       | 0.6  | -       | -    | -    | -       | -1.2 | -   | -       | -     | -      | -     | -      | -       | -       | -   | -       | -   | -   | -    | -       | -       | -       |
| Lab 6     | no   | -        | -       | -    | -       | -    | -    | -       | -    | -   | -       | -     | -      | -     | -      | -       | no stat | -   | -       | -   | -   | -    | -       | -       | -       |
| Lab 6     | no   | -        | -       | 1.0  | -       | -    | -    | -       | 0.5  | -   | -       | -     | -      | -     | -      | -       | no stat | -   | -       | -   | -   | -    | -       | -       | -       |
| Lab 7     | yes  | -        | -       | 18.3 | no stat | -    | -    | -       | -    | -   | no stat | -     | -      | -     | -      | -       | -       | -   | -       | -   | -   | -    | -       | -       | -       |
| Lab 7     | yes  | -        | -       | 19.1 | no stat | -    | -    | -       | -    | -   | no stat | -     | -      | -     | -      | -       | -       | -   | -       | -   | -   | -    | -       | -       | -       |
| Lab 8     | no   | no stat  | no stat | -    | -       | -    | -    | no stat | -3.2 | -   | -       | -     | -      | -     | -      | -       | -       | -   | no stat | -   | -   | -1.6 | no stat | -       | -       |
| Lab 8     | no   | no stat  | no stat | -    | -       | -    | -    | -       | -    | -   | -       | -     | -      | -     | -      | -       | -       | -   | no stat | -   | -   | -2.1 | no stat | -       | -       |
| Lab 9     | no   | -        | -       | 0.2  | -       | -    | -    | -       | -    | -   | -       | -     | -      | -     | -      | -       | -       | -   | -       | -   | -   | 3.1  | -       | -       | no stat |
| Lab 9     | no   | -        | -       | 1.0  | -       | -    | -    | -       | -    | -   | -       | -     | -      | -     | -      | -       | -       | -   | -       | -   | -   | 2.2  | -       | -       | no stat |
| Lab 10    | no   | -        | -       | 0.0  | -       | -    | -    | -       | -    | -   | -       | -     | -      | -     | -      | -       | -       | -   | -       | -   | -   | 2.3  | -       | -       | no stat |
| Lab 10    | no   | -        | -       | 0.3  | -       | -    | -    | -       | -    | -   | -       | -     | -      | -     | -      | -       | -       | -   | -       | -   | -   | 1.8  | -       | -       | no stat |

| Lab<br>Cod<br>e | ISTD | 15-<br>AcDO<br>N | 3-<br>AcDO<br>N | AFB1 | AFB2 | AFG1 | AFG2 | AOH  | BEA  | D3G | DON     | ENN-A | ENN<br>-A1 | ENN-B | ENN<br>-B1 | FB1     | FB2     | FB3 | HT-2 | MON | NIV | OTA     | OTB | T-2   | ZEN  |
|-----------------|------|------------------|-----------------|------|------|------|------|------|------|-----|---------|-------|------------|-------|------------|---------|---------|-----|------|-----|-----|---------|-----|-------|------|
|                 |      | Lot 3            |                 |      |      |      |      |      |      |     |         |       |            |       |            |         |         |     |      |     |     |         |     |       |      |
| Lab 1           | yes  | -                | -               | -    | -    | -    | -    | -    | -    | -   | -       | -     | -          | -     | -2.1       | -       | -       | -   | 1.3  | -   | -   | -       | -   | 1.5   | 0.0  |
| Lab 1           | yes  | -                | -               | -    | -    | -    | -    | -    | -    | -   | -       | -     | -          | -     | -1.9       | -       | -       | -   | 2.3  | -   | -   | -       | -   | 0.3   | 0.0  |
| Lab 2           | no   | -                | -               | -    | -    | -    | -    | -1.1 | -3.1 | -   | -       | -2.5  | -1.4       | -2.5  | -0.3       | -       | -       | -   | -    | -   | -   | -       | -   | -0.1  | -0.4 |
| Lab 2           | no   | -                | -               | -    | -    | -    | -    | -1.0 | -2.8 | -   | -       | -1.9  | -1.9       | -2.4  | -1.5       | -       | -       | -   | -    | -   | -   | -       | -   | -0.1  | -0.7 |
| Lab 3           | yes  | -                | -               | -    | -    | -    | -    | -    | -    | -   | no stat | -     | -          | -     | -          | no stat | -       | -   | 3.1  | -   | -   | no stat | -   | -0.1  | 0.1  |
| Lab 3           | yes  | -                | -               | -    | -    | -    | -    | -    | -    | -   | no stat | -     | -          | -     | -          | no stat | -       | -   | -1.9 | -   | -   | no stat | -   | -0.8  | -1.8 |
| Lab 4           | yes  | -                | -               | -    | -    | -    | -    | -0.5 | 12.3 | -   | -       | 2.3   | -0.6       | -0.2  | -0.1       | -       | -       | -   | -1.6 | -   | -   | -       | -   | -     | 0.1  |
| Lab 4           | yes  | -                | -               | -    | -    | -    | -    | -0.1 | 13.2 | -   | -       | 2.0   | -0.8       | -0.3  | -0.1       | -       | -       | -   | -1.6 | -   | -   | -       | -   | -     | 0.3  |
| Lab 5           | yes  | -                | -               | -    | -    | -    | -    | 3.1  | -1.3 | -   | -       | -     | 6.2        | 2.1   | 7.9        | -       | -       | -   | -0.4 | -   | -   | -       | -   | -     | -    |
| Lab 5           | yes  | -                | -               | -    | -    | -    | -    | 5.5  | 0.7  | -   | -       | -     | 2.1        | 0.2   | 0.9        | -       | -       | -   | 4.8  | -   | -   | -       | -   | -     | 5.5  |
| Lab 6           | no   | -                | -               | -    | -    | -    | -    | -    | -2.7 | -   | -       | -0.9  | -0.6       | 2.4   | 1.2        | -       | no stat | -   | -    | -   | -   | -       | -   | -     | -0.5 |
| Lab 6           | no   | -                | -               | -    | -    | -    | -    | -    | -1.8 | -   | -       | 1.0   | -0.4       | -0.8  | -1.5       | -       | no stat | -   | 9.6  | -   | -   | -       | -   | 12.7  | 0.7  |
| Lab 7           | yes  | -                | -               | -    | -    | -    | -    | -    | -    | -   | -       | -     | -          | -     | -          | -       | -       | -   | -    | -   | -   | -       | -   | 172.8 | -    |
| Lab 7           | yes  | -                | -               | -    | -    | -    | -    | -    | -    | -   | -       | -     | -          | -     | -          | -       | -       | -   | -    | -   | -   | -       | -   | 164.8 | -    |
| Lab 8           | no   | no stat          | no stat         | -    | -    | -    | -    | -3.5 | -    | -   | -       | -     | -          | -0.3  | -2.8       | -       | -       | -   | -0.2 | -   | -   | no stat | -   | -3.1  | -4.2 |
| Lab 8           | no   | no stat          | no stat         | -    | -    | -    | -    | -2.7 | -    | -   | -       | -     | -          | -2.3  | -          | -       | -       | -   | 0.6  | -   | -   | no stat | -   | -1.0  | -4.2 |
| Lab 9           | no   | -                | -               | -    | -    | -    | -    | 0.5  | 2.2  | -   | -       | -     | 0.9        | 1.4   | 1.9        | -       | -       | -   | -1.1 | -   | -   | -       | -   | -0.3  | 0.6  |
| Lab 9           | no   | -                | -               | -    | -    | -    | -    | 0.8  | 1.2  | -   | -       | -     | 0.8        | 1.2   | 1.4        | -       | -       | -   | -0.6 | -   | -   | -       | -   | -0.7  | 0.7  |
| Lab 10          | no   | -                | -               | -    | -    | -    | -    | 0.4  | -0.5 | -   | -       | -     | -          | 0.7   | 1.1        | -       | -       | -   | -1.4 | -   | -   | -       | -   | -1.2  | 0.8  |
| Lab 10          | no   | -                | -               | -    | -    | -    | -    | 0.5  | 0.0  | -   | -       | -     | -          | 0.6   | 0.8        | -       | -       | -   | -1.6 | -   | -   | -       | -   | -1.1  | 0.4  |

[illegible]

[illegible][illegible]

[illegible][illegible]

| Lab<br>Cod<br>e | ISTD | 15-<br>AcDO<br>N | 3-<br>AcDO<br>N | AFB1 | AFB2 | AFG1 | AFG2 | AOH  | BEA  | D3G | DON  | ENN-A | ENN<br>-A1 | ENN-B | ENN<br>-B1 | FB1     | FB2     | FB3 | HT-2 | MON | NIV | OTA     | OTB | T-2  | ZEN  |
|-----------------|------|------------------|-----------------|------|------|------|------|------|------|-----|------|-------|------------|-------|------------|---------|---------|-----|------|-----|-----|---------|-----|------|------|
|                 |      | Lot 9            |                 |      |      |      |      |      |      |     |      |       |            |       |            |         |         |     |      |     |     |         |     |      |      |
| Lab 1           | yes  | -                | -               | -    | -    | -    | -    | 1.2  | -1.5 | -   | -    | -0.9  | 1.0        | -     | -1.1       | -       | -       | -   | 0.3  | -   | -   | -       | -   | 0.4  | -0.6 |
| Lab 1           | yes  | -                | -               | -    | -    | -    | -    | 0.9  | -1.8 | -   | -    | -2.0  | -0.9       | -     | -1.5       | -       | -       | -   | 0.6  | -   | -   | -       | -   | 0.4  | -0.7 |
| Lab 2           | no   | -                | -               | -    | -    | -    | -    | -2.2 | -1.5 | -   | -0.1 | -1.2  | -0.3       | -2.0  | 0.1        | -       | -       | -   | 1.5  | -   | -   | -       | -   | 1.1  | 0.9  |
| Lab 2           | no   | -                | -               | -    | -    | -    | -    | -1.9 | -1.4 | -   | -0.4 | -1.0  | 0.1        | -1.7  | 0.3        | -       | -       | -   | 1.2  | -   | -   | -       | -   | 0.6  | -0.1 |
| Lab 3           | yes  | -                | -               | -    | -    | -    | -    | -    | -    | -   | 1.5  | -     | -          | -     | -          | no stat | no stat | -   | -0.5 | -   | -   | no stat | -   | -0.4 | 0.8  |
| Lab 3           | yes  | -                | -               | -    | -    | -    | -    | -    | -    | -   | 1.8  | -     | -          | -     | -          | no stat | no stat | -   | -0.1 | -   | -   | no stat | -   | -0.1 | 0.0  |
| Lab 4           | yes  | -                | -               | -    | -    | -    | -    | -0.7 | 12.7 | -   | -    | 0.6   | -0.8       | 0.1   | -0.2       | -       | -       | -   | -1.7 | -   | -   | -       | -   | 1.0  | 1.2  |
| Lab 4           | yes  | -                | -               | -    | -    | -    | -    | -0.4 | 12.2 | -   | -    | 0.2   | -1.3       | -0.1  | -0.5       | -       | -       | -   | -1.7 | -   | -   | -       | -   | 1.0  | 0.7  |
| Lab 5           | yes  | -                | -               | -    | -    | -    | -    | 9.5  | -1.7 | -   | -    | 5.9   | 6.4        | 1.4   | 9.5        | -       | -       | -   | 0.5  | -   | -   | -       | -   | -    | 2.3  |
| Lab 5           | yes  | -                | -               | -    | -    | -    | -    | -3.1 | -0.3 | -   | 4.8  | 1.1   | 0.2        | -1.3  | -0.5       | -       | -       | -   | 0.6  | -   | -   | -       | -   | -    | 2.4  |
| Lab 6           | no   | -                | -               | -    | -    | -    | -    | -    | -1.2 | -   | -    | -0.7  | -0.1       | 2.6   | 0.1        | -       | no stat | -   | 1.8  | -   | -   | -       | -   | -1.4 | -1.0 |
| Lab 6           | no   | -                | -               | -    | -    | -    | -    | -2.0 | -1.8 | -   | -    | -0.4  | 0.6        | 0.7   | -1.0       | -       | no stat | -   | 3.5  | -   | -   | -       | -   | -0.3 | -2.4 |
| Lab 7           | yes  | -                | -               | -    | -    | -    | -    | -    | -    | -   | -    | -     | -          | -     | -          | -       | -       | -   | 0.3  | -   | -   | -       | -   | 72.2 | -0.6 |
| Lab 7           | yes  | -                | -               | -    | -    | -    | -    | -    | -    | -   | -    | -     | -          | -     | -          | -       | -       | -   | 0.0  | -   | -   | -       | -   | 70.7 | -0.7 |
| Lab 8           | no   | -                | no stat         | -    | -    | -    | -    | -0.5 | 0.3  | -   | -3.3 | -     | -1.0       | -0.4  | 0.4        | -       | -       | -   | -2.1 | -   | -   | -       | -   | -1.3 | -3.6 |
| Lab 8           | no   | -                | no stat         | -    | -    | -    | -    | -0.9 | 0.3  | -   | -3.4 | -     | -1.9       | -1.0  | -0.9       | -       | -       | -   | -1.9 | -   | -   | -       | -   | -0.7 | -3.8 |
| Lab 9           | no   | -                | -               | -    | -    | -    | -    | 1.5  | 1.4  | -   | -    | -0.1  | 1.5        | 0.8   | 0.9        | -       | -       | -   | 0.1  | -   | -   | -       | -   | -1.2 | 1.3  |
| Lab 9           | no   | -                | -               | -    | -    | -    | -    | 1.4  | 1.4  | -   | -    | -0.2  | 1.2        | 0.7   | 0.8        | -       | -       | -   | -0.3 | -   | -   | -       | -   | -0.8 | 1.1  |
| Lab 10          | no   | -                | -               | -    | -    | -    | -    | 1.7  | 1.1  | -   | -    | 1.8   | -0.6       | 0.3   | 0.8        | -       | -       | -   | -1.0 | -   | -   | -       | -   | -0.4 | -0.1 |
| Lab 10          | no   | -                | -               | -    | -    | -    | -    | 1.9  | 0.5  | -   | -    | 1.1   | 0.3        | 0.0   | 0.7        | -       | -       | -   | -0.6 | -   | -   | -       | -   | -0.6 | -0.1 |

[illegible]

### 3.2. Overview of individual z-score data for corn gluten matrix

**Table S7:** Summary of z-score performance of 10 corn gluten matrices. Acceptable, questionable and unacceptable z-scores are colored in green, yellow and red respectively. No-stat information refers to positive findings where a z-score calculation was not feasible due to a reduced number of reported results.

| Lab<br>Cod<br>e | ISTD | 15-<br>AcDO<br>N | 3-<br>AcDO<br>N | AFB1    | AFB2 | AFG1    | AFG2 | AOH  | BEA  | D3G     | DON  | ENN-<br>A | ENN<br>-A1 | ENN-B | ENN<br>-B1 | FB1  | FB2  | FB3  | HT-2 | MON  | NIV | OTA  | OTB     | T-2  | ZEN  |
|-----------------|------|------------------|-----------------|---------|------|---------|------|------|------|---------|------|-----------|------------|-------|------------|------|------|------|------|------|-----|------|---------|------|------|
|                 |      | Lot<br>1         |                 |         |      |         |      |      |      |         |      |           |            |       |            |      |      |      |      |      |     |      |         |      |      |
| Lab 1           | yes  | -                | -               | -       | -    | -       | -    | 2.6  | -    | -       | 2.6  | -         | -0.5       | -     | -1.1       | -2.7 | -2.3 | -2.3 | -    | 0.4  | -   | 2.2  | -       | -0.7 | 0.6  |
| Lab 1           | yes  | -                | -               | -       | -    | -       | -    | 2.8  | -    | -       | 3.0  | -         | 2.0        | -     | -0.4       | -2.4 | -2.1 | -2.1 | -    | 0.4  | -   | 2.4  | -       | -0.6 | 0.8  |
| Lab 2           | no   | -2.4             | -               | no stat | -    | no stat | -    | -2.9 | -1.8 | no stat | -1.2 | 0.0       | 0.4        | -0.1  | 0.9        | 3.3  | 1.5  | 1.9  | -0.1 | -0.1 | -   | 0.6  | no stat | 0.5  | -1.1 |
| Lab 2           | no   | -2.4             | -               | no stat | -    | no stat | -    | -2.8 | -1.9 | no stat | -1.1 | -0.3      | 0.3        | -0.3  | 0.8        | 2.9  | 1.4  | 2.0  | 0.7  | -0.1 | -   | 0.1  | no stat | 0.4  | -0.7 |
| Lab 3           | yes  | -                | -               | -       | -    | -       | -    | -    | -    | -       | 0.0  | -         | -          | -     | -          | -3.7 | -2.4 | -    | -1.9 | -    | -   | -0.9 | -       | -0.6 | 1.3  |
| Lab 3           | yes  | -                | -               | -       | -    | -       | -    | -    | -    | -       | -0.4 | -         | -          | -     | -          | -3.8 | -2.4 | -    | -1.7 | -    | -   | -0.7 | -       | -0.4 | 1.5  |
| Lab 4           | yes  | 3.1              | -               | -       | -    | -       | -    | -1.8 | 11.8 | -       | -0.3 | 0.0       | -2.0       | -0.3  | -1.4       | 0.1  | -0.3 | -0.9 | -2.1 | 0.2  | -   | -    | -       | -0.5 | -0.4 |
| Lab 4           | yes  | 3.4              | -               | -       | -    | -       | -    | -1.8 | 11.9 | -       | -0.4 | 0.1       | -2.5       | -0.5  | -1.5       | 0.0  | -0.1 | -0.3 | -2.3 | 0.3  | -   | -    | -       | -0.1 | -0.6 |
| Lab 5           | yes  | 1.6              | -               | -       | -    | -       | -    | 2.2  | -4.9 | -       | -0.5 | -         | -          | 2.9   | 1.2        | 1.8  | 1.0  | 0.0  | -    | -    | -   | 1.0  | -       | -    | -1.1 |
| Lab 5           | yes  | -0.1             | -               | -       | -    | -       | -    | 0.1  | -5.1 | -       | 0.1  | -         | -          | -3.6  | -          | 0.8  | 3.6  | 1.7  | -    | -    | -   | -1.1 | -       | 0.4  | -0.3 |
| Lab 6           | no   | -                | -               | -       | -    | -       | -    | -    | -0.7 | -       | -1.8 | 1.2       | -0.7       | 4.7   | 1.8        | 6.9  | 2.6  | -    | 8.2  | -    | -   | 2.7  | -       | -1.4 | -1.9 |
| Lab 6           | no   | -                | -               | -       | -    | no stat | -    | -    | -1.7 | -       | -0.9 | 1.8       | 1.4        | 2.5   | 0.6        | 21.7 | 9.3  | -    | 6.6  | -    | -   | 3.3  | -       | -0.4 | -3.1 |
| Lab 7           | yes  | -                | -               | -       | -    | -       | -    | -    | -    | -       | 0.1  | -         | -          | -     | -          | -0.4 | -1.1 | -    | 1.1  | -    | -   | -    | -       | 4.5  | 2.1  |
| Lab 7           | yes  | -                | -               | -       | -    | -       | -    | -    | -    | -       | -0.1 | -         | -          | -     | -          | -0.6 | -1.3 | -    | -0.1 | -    | -   | -    | -       | 3.1  | 1.4  |
| Lab 8           | no   | -2.2             | -4.2            | -       | -    | -       | -    | -0.8 | 1.1  | -       | -3.1 | -         | -          | -1.2  | -1.5       | 0.7  | -0.6 | -    | -3.1 | -2.0 | -   | -1.6 | -       | -1.6 | -3.5 |
| Lab 8           | no   | -2.4             | -4.3            | -       | -    | -       | -    | -1.1 | 2.1  | -       | -3.1 | -         | -          | -0.4  | -1.0       | 1.5  | 0.5  | -    | -2.8 | -1.2 | -   | 0.6  | -       | -1.0 | -3.2 |
| Lab 9           | no   | 0.0              | 1.6             | -       | -    | -       | -    | 1.0  | 1.1  | -       | 3.2  | -0.2      | 1.2        | 0.8   | 0.9        | -0.3 | 1.5  | 1.1  | 2.0  | -    | -   | -0.3 | -       | 1.1  | 2.1  |
| Lab 9           | no   | -0.5             | 0.9             | -       | -    | -       | -    | 0.5  | 0.6  | -       | 2.6  | -0.2      | 1.1        | 0.7   | 0.9        | -0.9 | 0.8  | 1.0  | 2.6  | -    | -   | -0.3 | -       | 0.2  | 1.6  |
| Lab 10          | no   | 1.2              | 0.5             | -       | -    | -       | -    | 1.0  | 0.3  | -       | 3.7  | -         | -0.4       | -0.3  | -0.1       | -1.6 | -1.3 | -1.0 | -0.4 | -    | -   | -2.3 | -       | 2.0  | 1.1  |
| Lab 10          | no   | 0.7              | 0.1             | -       | -    | -       | -    | 1.0  | 0.1  | -       | 2.8  | -         | -0.6       | -0.1  | -0.2       | -1.5 | -1.1 | -1.0 | 0.0  | -    | -   | -1.8 | -       | 2.8  | 1.2  |

| Lab<br>Cod<br>e | ISTD | 15-<br>AcDO<br>N | 3-<br>AcDO<br>N | AFB1 | AFB2 | AFG1 | AFG2 | AOH  | BEA  | D3G | DON  | ENN-<br>A | ENN<br>-A1 | ENN-B | ENN<br>-B1 | FB1  | FB2  | FB3  | HT-2 | MON  | NIV | OTA  | OTB     | T-2  | ZEN  |
|-----------------|------|------------------|-----------------|------|------|------|------|------|------|-----|------|-----------|------------|-------|------------|------|------|------|------|------|-----|------|---------|------|------|
|                 |      | Lot<br>2         |                 |      |      |      |      |      |      |     |      |           |            |       |            |      |      |      |      |      |     |      |         |      |      |
| Lab 1           | yes  | -                | -               | -    | -    | -    | -    | 2.6  | -    | -   | 3.1  | -         | 2.3        | -     | -0.2       | -2.6 | -2.1 | -1.8 | -    | 2.7  | -   | 1.5  | -       | -0.8 | 1.1  |
| Lab 1           | yes  | -                | -               | -    | -    | -    | -    | 2.1  | -    | -   | 2.6  | -         | 1.2        | -     | -0.5       | -2.4 | -2.0 | -2.2 | -    | 2.3  | -   | 1.7  | -       | -0.7 | 0.6  |
| Lab 2           | no   | -2.4             | -               | -    | -    | -    | -    | -3.0 | -2.1 | -   | -1.4 | -0.7      | -0.2       | -0.2  | 1.0        | 2.6  | 1.5  | 1.7  | 0.2  | -0.6 | -   | 0.4  | no stat | 0.3  | -1.0 |
| Lab 2           | no   | -2.5             | -               | -    | -    | -    | -    | -2.9 | -2.1 | -   | -1.6 | -1.1      | -0.2       | -0.4  | 1.0        | 3.5  | 2.4  | 2.4  | 0.7  | -0.3 | -   | 0.3  | no stat | 0.2  | -1.1 |
| Lab 3           | yes  | -                | -               | -    | -    | -    | -    | -    | -    | -   | 0.4  | -         | -          | -     | -          | -3.6 | -2.5 | -    | -1.8 | -    | -   | -1.1 | -       | -1.2 | 0.3  |
| Lab 3           | yes  | -                | -               | -    | -    | -    | -    | -    | -    | -   | 0.3  | -         | -          | -     | -          | -3.6 | -2.6 | -    | -1.6 | -    | -   | -1.0 | -       | -0.4 | 2.0  |
| Lab 4           | yes  | 4.2              | -               | -    | -    | -    | -    | -1.6 | 12.4 | -   | -0.8 | 0.4       | -2.6       | -0.5  | -1.4       | 1.0  | 0.0  | 0.1  | -    | 0.2  | -   | 7.0  | -       | 0.2  | -0.5 |
| Lab 4           | yes  | 3.0              | -               | -    | -    | -    | -    | -1.4 | 8.9  | -   | -0.9 | -0.5      | -2.3       | -1.1  | -1.9       | 0.3  | 0.2  | 0.1  | -    | 0.4  | -   | 7.1  | -       | -0.2 | -0.8 |
| Lab 5           | yes  | 1.6              | -               | -    | -    | -    | -    | 1.8  | -4.9 | -   | -0.1 | -         | -          | 1.0   | 0.1        | 0.4  | 0.2  | -0.5 | -    | -    | -   | -0.2 | -       | -    | 0.1  |
| Lab 5           | yes  | 0.2              | -               | -    | -    | -    | -    | -0.2 | -5.2 | -   | -0.1 | -         | -          | -3.6  | -          | 0.4  | 3.5  | 1.8  | -    | -    | -   | -1.8 | -       | 0.4  | -0.8 |
| Lab 6           | no   | -                | -               | -    | -    | -    | -    | -    | -1.1 | -   | -2.5 | 1.0       | -0.7       | 4.7   | 1.6        | 8.9  | 1.7  | -    | 7.1  | -    | -   | 0.3  | -       | -1.4 | -1.8 |
| Lab 6           | no   | -                | -               | -    | -    | -    | -    | -    | -2.0 | -   | -2.1 | 1.0       | 1.4        | 2.1   | 0.1        | 23.8 | 10.5 | -    | 7.3  | -    | -   | 1.6  | -       | -0.9 | -3.2 |
| Lab 7           | yes  | -                | -               | -    | -    | -    | -    | -    | -    | -   | -1.1 | -         | -          | -     | -          | -0.2 | -1.3 | -    | 0.1  | -    | -   | -    | -       | 2.5  | 1.2  |
| Lab 7           | yes  | -                | -               | -    | -    | -    | -    | -    | -    | -   | -0.6 | -         | -          | -     | -          | -0.1 | -0.8 | -    | 0.8  | -    | -   | -    | -       | 2.7  | 1.6  |
| Lab 8           | no   | -2.4             | -4.2            | -    | -    | -    | -    | -1.0 | 1.5  | -   | -2.8 | -         | -          | -1.1  | -1.5       | 0.8  | -0.2 | -    | -2.9 | -2.2 | -   | -1.9 | -       | -1.7 | -3.4 |
| Lab 8           | no   | -2.5             | -4.1            | -    | -    | -    | -    | -1.2 | 2.8  | -   | -2.7 | -         | -          | -0.1  | -0.6       | 1.5  | 0.7  | -    | -2.9 | -1.3 | -   | 0.2  | -       | -0.9 | -3.1 |
| Lab 9           | no   | 0.1              | 0.8             | -    | -    | -    | -    | 1.2  | 1.4  | -   | 2.4  | -         | 1.2        | 0.9   | 0.5        | -0.9 | 0.4  | 0.6  | 1.7  | -    | -   | -1.6 | -       | 0.2  | 1.8  |
| Lab 9           | no   | 0.2              | -0.1            | -    | -    | -    | -    | 1.0  | 1.2  | -   | 2.6  | -         | 1.2        | 0.4   | 0.5        | -1.2 | 0.4  | -0.1 | 0.4  | -    | -   | -1.3 | -       | 0.1  | 1.5  |
| Lab 10          | no   | 0.0              | 1.5             | -    | -    | -    | -    | 0.8  | 0.1  | -   | 3.2  | -         | -0.6       | 0.2   | 0.2        | -1.5 | -0.8 | -0.9 | -0.8 | -    | -   | -2.1 | -       | 1.1  | 1.3  |
| Lab 10          | no   | 0.5              | 1.1             | -    | -    | -    | -    | 1.4  | 0.1  | -   | 3.0  | -         | -0.7       | -0.2  | 0.0        | -1.7 | -0.6 | -0.9 | -0.4 | -    | -   | -1.6 | -       | 1.2  | 1.3  |

| Lab Cod e | ISTD | 15-AcDO N | 3-AcDO N | AFB1 | AFB2 | AFG1 | AFG2 | AOH  | BEA  | D3G     | DON  | ENN-A | ENN-A1  | ENN-B   | ENN-B1  | FB1  | FB2  | FB3  | HT-2 | MON  | NIV | OTA     | OTB | T-2  | ZEN  |
|-----------|------|-----------|----------|------|------|------|------|------|------|---------|------|-------|---------|---------|---------|------|------|------|------|------|-----|---------|-----|------|------|
| Lot 3     |      |           |          |      |      |      |      |      |      |         |      |       |         |         |         |      |      |      |      |      |     |         |     |      |      |
| Lab 1     | yes  | -         | -        | -    | -    | -    | -    | -    | -    | -       | 4.7  | -     | -       | -       | -       | -    | -1.6 | -1.4 | -    | -0.4 | -   | -       | -   | -0.1 | 0.0  |
| Lab 1     | yes  | -         | -        | -    | -    | -    | -    | -    | -    | no stat | 4.3  | -     | -       | -       | -       | -    | -1.4 | -1.1 | -    | -0.3 | -   | -       | -   | -0.1 | 0.2  |
| Lab 2     | no   | -2.7      | -        | -    | -    | -    | -    | -2.4 | -1.3 | no stat | -1.9 | -     | -       | no stat | no stat | 1.1  | 0.8  | 2.1  | 2.7  | 3.1  | -   | -       | -   | 0.0  | -0.7 |
| Lab 2     | no   | -2.5      | -        | -    | -    | -    | -    | -2.6 | -1.4 | no stat | -2.0 | -     | -       | no stat | no stat | 1.3  | 0.6  | 1.0  | 2.1  | 2.9  | -   | -       | -   | 0.1  | -0.7 |
| Lab 3     | yes  | -         | -        | -    | -    | -    | -    | -    | -    | -       | -0.9 | -     | -       | -       | -       | -3.9 | -    | -    | -0.5 | -    | -   | -       | -   | -    | 0.4  |
| Lab 3     | yes  | -         | -        | -    | -    | -    | -    | -    | -    | -       | -0.7 | -     | -       | -       | -       | -3.6 | -    | -    | -0.1 | -    | -   | -       | -   | -    | 1.0  |
| Lab 4     | yes  | 3.5       | -        | -    | -    | -    | -    | 1.5  | -2.2 | -       | -0.2 | -     | -       | -       | -       | -0.8 | -1.1 | 0.1  | -    | 0.2  | -   | -       | -   | -    | 0.4  |
| Lab 4     | yes  | 3.1       | -        | -    | -    | -    | -    | 1.2  | 0.0  | -       | -0.8 | -     | -       | -       | -       | -1.1 | -0.8 | -0.1 | -    | 0.3  | -   | -       | -   | -    | 1.2  |
| Lab 5     | yes  | 4.1       | -        | -    | -    | -    | -    | 3.9  | -4.1 | no stat | -2.6 | -     | -       | -       | -       | 0.4  | -1.0 | -0.5 | -    | -    | -   | -       | -   | -    | 1.0  |
| Lab 5     | yes  | 2.6       | -        | -    | -    | -    | -    | 3.3  | -4.3 | no stat | 1.4  | -     | -       | -       | -       | 0.6  | 1.8  | 2.0  | -    | -    | -   | -       | -   | -    | 1.3  |
| Lab 6     | no   | -         | -        | -    | -    | -    | -    | -    | -0.8 | -       | -2.1 | -     | -       | no stat | no stat | 4.9  | 0.7  | -    | -    | -    | -   | -       | -   | -0.6 | -1.0 |
| Lab 6     | no   | -         | -        | -    | -    | -    | -    | -    | -0.9 | -       | -1.4 | -     | no stat | no stat | no stat | 8.5  | 4.9  | -    | -    | -    | -   | -       | -   | 4.3  | -1.4 |
| Lab 7     | yes  | -         | -        | -    | -    | -    | -    | -    | -    | -       | 1.5  | -     | -       | -       | -       | 1.2  | -0.4 | -    | -    | -    | -   | -       | -   | -    | 0.6  |
| Lab 7     | yes  | -         | -        | -    | -    | -    | -    | -    | -    | -       | 1.9  | -     | -       | -       | -       | 0.4  | -0.9 | -    | -    | -    | -   | -       | -   | -    | 0.9  |
| Lab 8     | no   | -3.1      | -3.2     | -    | -    | -    | -    | -0.9 | 2.3  | -       | -4.6 | -     | -       | -       | -       | -0.7 | -1.3 | -    | -2.2 | -1.0 | -   | no stat | -   | -0.1 | -2.7 |
| Lab 8     | no   | -3.0      | -3.0     | -    | -    | -    | -    | -0.7 | 3.1  | -       | -4.6 | -     | -       | -       | -       | -0.2 | -0.3 | -    | -2.1 | -0.3 | -   | no stat | -   | 0.4  | -2.2 |
| Lab 9     | no   | -1.1      | 0.0      | -    | -    | -    | -    | -0.1 | 4.2  | -       | 2.3  | -     | -       | -       | -       | 1.1  | 1.8  | -0.4 | -    | -    | -   | -       | -   | -    | 0.0  |
| Lab 9     | no   | -0.6      | 0.8      | -    | -    | -    | -    | 0.4  | 4.3  | -       | 2.5  | -     | -       | -       | -       | 2.2  | 1.7  | 1.0  | -    | -    | -   | -       | -   | -    | 0.2  |
| Lab 10    | no   | -0.1      | 2.6      | -    | -    | -    | -    | -0.6 | 1.1  | -       | 1.9  | -     | -       | -       | -       | -1.2 | -0.2 | -0.3 | -    | -    | -   | -       | -   | -    | -0.2 |
| Lab 10    | no   | -0.2      | 2.8      | -    | -    | -    | -    | -0.2 | 1.5  | -       | 2.6  | -     | -       | -       | -       | -1.1 | -0.4 | -0.5 | -    | -    | -   | -       | -   | -    | -0.1 |

| Lab Cod e | ISTD | 15-AcDO N | 3-AcDO N | AFB1 | AFB2 | AFG1    | AFG2 | AOH  | BEA  | D3G | DON  | ENN-A   | ENN-A1 | ENN-B | ENN-B1 | FB1  | FB2  | FB3  | HT-2 | MON  | NIV     | OTA  | OTB | T-2  | ZEN  |
|-----------|------|-----------|----------|------|------|---------|------|------|------|-----|------|---------|--------|-------|--------|------|------|------|------|------|---------|------|-----|------|------|
| Lot 4     |      |           |          |      |      |         |      |      |      |     |      |         |        |       |        |      |      |      |      |      |         |      |     |      |      |
| Lab 1     | yes  | -         | -        | -    | -    | -       | -    | 9.3  | -    | -   | -    | -       | -      | -     | -      | -1.4 | -1.3 | -0.8 | 0.1  | -0.3 | -       | 2.2  | -   | -0.4 | -0.5 |
| Lab 1     | yes  | -         | -        | -    | -    | -       | -    | 9.2  | -    | -   | -    | -       | -      | -     | -      | -1.1 | -1.0 | -1.2 | 0.2  | -0.2 | -       | 2.6  | -   | -0.2 | -0.5 |
| Lab 2     | no   | -         | -        | 0.8  | -    | no stat | -    | -1.0 | -0.8 | -   | -1.7 | no stat | 1.0    | 0.7   | 1.5    | 3.6  | 1.6  | 2.6  | 1.9  | 0.5  | no stat | -0.9 | -   | -0.2 | -2.5 |
| Lab 2     | no   | -         | -        | 2.1  | -    | no stat | -    | -1.8 | -0.9 | -   | -2.6 | no stat | -1.2   | -0.2  | -0.1   | 2.6  | 0.6  | 3.2  | 2.5  | 0.2  | no stat | -0.9 | -   | -0.2 | -2.5 |
| Lab 3     | yes  | -         | -        | -    | -    | -       | -    | -    | -    | -   | 2.4  | -       | -      | -     | -      | -3.5 | -    | -    | -1.8 | -    | -       | -1.3 | -   | -0.6 | 8.9  |
| Lab 3     | yes  | -         | -        | -    | -    | -       | -    | -    | -    | -   | 3.1  | -       | -      | -     | -      | -3.6 | -    | -    | -1.6 | -    | -       | -1.2 | -   | 0.0  | 11.8 |
| Lab 4     | yes  | -         | -        | -    | -    | -       | -    | -0.1 | -3.2 | -   | -    | -       | -      | -0.9  | -2.9   | -0.2 | -1.3 | -0.8 | -1.3 | 0.8  | -       | 10.1 | -   | 1.4  | -0.3 |
| Lab 4     | yes  | -         | -        | -    | -    | -       | -    | 0.3  | -2.5 | -   | -    | -       | -      | -0.4  | -2.8   | -0.3 | -1.2 | 0.1  | -1.0 | 0.8  | -       | 9.0  | -   | 2.0  | -0.4 |
| Lab 5     | yes  | -         | -        | 1.2  | -    | -       | -    | 5.2  | -4.1 | -   | -    | -       | -      | 0.1   | -      | -0.4 | -1.0 | -0.3 | -    | -    | -       | 1.3  | -   | -    | -    |
| Lab 5     | yes  | -         | -        | -    | -    | -       | -    | 3.3  | -4.2 | -   | -    | -       | -      | -1.0  | -      | 0.1  | 0.8  | 1.3  | 1.0  | -    | -       | 0.9  | -   | 3.3  | -    |
| Lab 6     | no   | -         | -        | -    | -    | -       | -    | -    | 0.8  | -   | -    | -       | -0.3   | 6.6   | 2.7    | 10.3 | 2.2  | -    | 5.4  | -    | -       | -    | -   | -1.6 | -    |
| Lab 6     | no   | -         | -        | -    | -    | no stat | -    | -    | 1.0  | -   | -    | -       | 3.7    | 3.7   | 1.8    | 14.8 | 7.3  | -    | 5.4  | -    | -       | 3.9  | -   | -0.4 | 4.9  |
| Lab 7     | yes  | -         | -        | -1.5 | -    | -       | -    | -    | -    | -   | -    | -       | -      | -     | -      | 1.3  | 0.9  | -    | 0.4  | -    | -       | -    | -   | 1.0  | -    |
| Lab 7     | yes  | -         | -        | -1.4 | -    | -       | -    | -    | -    | -   | -    | -       | -      | -     | -      | -1.2 | -2.0 | -    | -0.7 | -    | -       | -    | -   | 1.1  | -    |
| Lab 8     | no   | no stat   | no stat  | -    | -    | -       | -    | -0.8 | 4.0  | -   | 2.4  | -       | -      | -     | -      | 1.5  | -0.3 | -    | -2.6 | -1.1 | -       | -0.6 | -   | -0.9 | -    |
| Lab 8     | no   | no stat   | no stat  | -    | -    | -       | -    | -    | -0.7 | -   | 0.3  | -       | -      | -4.0  | -      | -1.6 | -0.4 | -    | -4.2 | -0.8 | -       | -3.8 | -   | -1.1 | 5.8  |
| Lab 9     | no   | -         | -        | -0.8 | -    | -       | -    | -0.6 | 3.5  | -   | -    | -       | -0.1   | 0.5   | 0.5    | 0.3  | 0.3  | 0.2  | 0.8  | -    | -       | -2.4 | -   | 0.1  | -0.4 |
| Lab 9     | no   | -         | -        | -1.1 | -    | -       | -    | -1.1 | 3.7  | -   | -    | -       | -0.3   | 0.2   | 1.5    | -0.8 | 0.7  | -1.0 | 0.6  | -    | -       | -2.2 | -   | 0.0  | -0.1 |
| Lab 10    | no   | -         | -        | 0.4  | -    | no stat | -    | -1.5 | 1.7  | -   | -    | -       | -      | -0.2  | -1.3   | -0.1 | -0.3 | 0.0  | -0.8 | -    | -       | -3.0 | -   | 0.1  | -1.9 |
| Lab 10    | no   | -         | -        | 0.2  | -    | no stat | -    | -0.7 | 1.8  | -   | -    | -       | -      | -0.1  | -1.0   | 0.0  | -0.1 | -0.2 | -0.3 | -    | -       | -3.2 | -   | 0.0  | -1.7 |

| Lab<br>Cod<br>e | ISTD | 15-<br>AcDO<br>N | 3-<br>AcDO<br>N | AFB1    | AFB2 | AFG1 | AFG2 | AOH  | BEA | D3G  | DON  | ENN-<br>A | ENN<br>-A1 | ENN-B   | ENN<br>-B1 | FB1     | FB2  | FB3  | HT-2    | MON  | NIV  | OTA     | OTB | T-2     | ZEN  |      |
|-----------------|------|------------------|-----------------|---------|------|------|------|------|-----|------|------|-----------|------------|---------|------------|---------|------|------|---------|------|------|---------|-----|---------|------|------|
|                 |      | Lot 5            |                 |         |      |      |      |      |     |      |      |           |            |         |            |         |      |      |         |      |      |         |     |         |      |      |
| Lab 1           | yes  | -                | -               | -       | -    | -    | -    | -    | -   | -    | 6.3  | -         | -          | -       | -          | -1.7    | -1.6 | -1.3 | -       | -    | -    | -       | -   | -       | 3.4  |      |
| Lab 1           | yes  | -                | -               | -       | -    | -    | -    | -    | -   | -    | 5.0  | -         | -          | -       | -          | -1.7    | -1.4 | -0.5 | -       | -    | -    | -       | -   | -       | 2.6  |      |
| Lab 2           | no   | -2.6             | -               | no stat | -    | -    | -    | -    | -   | -1.2 | -2.4 | -2.0      | -          | -       | -4.4       | no stat | 1.3  | 1.0  | 2.7     | -    | 3.3  | no stat | -   | -       | -    | -0.5 |
| Lab 2           | no   | -2.6             | -               | no stat | -    | -    | -    | -    | -   | -1.3 | -2.4 | -1.8      | -          | -       | -4.3       | no stat | 0.5  | 0.2  | 1.3     | -    | 3.8  | no stat | -   | -       | -    | 0.5  |
| Lab 3           | yes  | -                | -               | -       | -    | -    | -    | -    | -   | -    | -1.1 | -         | -          | -       | -          | -3.5    | -    | -    | -       | -    | -    | -       | -   | -       | 0.3  |      |
| Lab 3           | yes  | -                | -               | -       | -    | -    | -    | -    | -   | -    | -1.2 | -         | -          | -       | -          | -3.6    | -    | -    | no stat | -    | -    | -       | -   | -       | 0.1  |      |
| Lab 4           | yes  | 3.9              | -               | -       | -    | -    | -    | -    | -   | -1.5 | -    | -0.5      | -          | -       | 8.4        | -       | -1.5 | -1.1 | -0.2    | -    | -0.9 | -       | -   | -       | -0.7 |      |
| Lab 4           | yes  | 3.5              | -               | -       | -    | -    | -    | -    | -   | 0.6  | -    | -0.5      | -          | -       | 8.9        | -       | -1.3 | -1.3 | -0.2    | -    | -0.3 | -       | -   | -       | -0.3 |      |
| Lab 5           | yes  | 4.6              | -               | -       | -    | -    | -    | -    | -   | -4.3 | -1.9 | -2.1      | -          | -       | -          | 0.7     | 0.1  | -    | -       | -    | -    | -       | -   | -       | 0.3  |      |
| Lab 5           | yes  | 1.2              | -               | -       | -    | -    | -    | -    | -   | -4.4 | 0.2  | 0.7       | -          | -       | -          | 0.3     | 1.4  | -    | -       | -    | -    | -       | -   | -       | 0.5  |      |
| Lab 6           | no   | -                | -               | -       | -    | -    | -    | -    | -   | -0.1 | -    | -1.7      | -          | -       | -3.9       | no stat | 6.1  | 3.7  | -       | -    | -    | -       | -   | -       | -1.1 |      |
| Lab 6           | no   | -                | -               | -       | -    | -    | -    | -    | -   | -0.1 | -    | -1.0      | -          | no stat | -3.4       | no stat | 7.7  | 6.7  | -       | -    | -    | -       | -   | no stat | -1.6 |      |
| Lab 7           | yes  | -                | -               | -       | -    | -    | -    | -    | -   | -    | 1.3  | -         | -          | -       | -          | 0.2     | -1.0 | -    | -       | -    | -    | -       | -   | -       | 1.8  |      |
| Lab 7           | yes  | -                | -               | -       | -    | -    | -    | -    | -   | -    | 0.6  | -         | -          | -       | -          | 0.9     | -0.6 | -    | -       | -    | -    | -       | -   | -       | 0.3  |      |
| Lab 8           | no   | -3.6             | -4.2            | -       | -    | -    | -    | 0.0  | 1.2 | -    | -4.7 | -         | -          | 1.3     | -          | -0.6    | -1.1 | -    | no stat | -3.2 | -    | no stat | -   | no stat | -2.7 |      |
| Lab 8           | no   | -3.5             | -4.2            | -       | -    | -    | -    | 0.2  | 2.1 | -    | -4.6 | -         | -          | 3.2     | -          | 0.0     | -0.4 | -    | -       | -2.7 | -    | -       | -   | no stat | -2.4 |      |
| Lab 9           | no   | -0.9             | 0.7             | -       | -    | -    | -    | 1.7  | 2.8 | 1.2  | 3.5  | -         | -          | -       | -          | 1.3     | 2.3  | -    | -       | -    | -    | -       | -   | -       | 0.0  |      |
| Lab 9           | no   | -0.3             | 0.2             | -       | -    | -    | -    | 0.6  | 3.5 | 1.0  | 3.2  | -         | -          | -       | -          | 1.5     | 1.2  | -    | -       | -    | -    | -       | -   | -       | 0.2  |      |
| Lab 10          | no   | -0.2             | 1.7             | -       | -    | -    | -    | -0.5 | 0.1 | 1.6  | 3.1  | -         | -          | -       | -          | -0.4    | -0.1 | -    | -       | -    | -    | -       | -   | -       | -0.1 |      |
| Lab 10          | no   | 0.5              | 1.9             | -       | -    | -    | -    | -0.2 | 0.1 | 2.1  | 2.8  | -         | -          | -       | -          | 0.0     | -0.8 | -    | -       | -    | -    | -       | -   | -       | -0.2 |      |

| Lab Cod e | ISTD | 15-AcDO N | 3-AcDO N | AFB1 | AFB2 | AFG1    | AFG2 | AOH  | BEA  | D3G | DON  | ENN-A   | ENN-A1 | ENN-B | ENN-B1 | FB1  | FB2  | FB3  | HT-2 | MON  | NIV | OTA  | OTB     | T-2  | ZEN  |
|-----------|------|-----------|----------|------|------|---------|------|------|------|-----|------|---------|--------|-------|--------|------|------|------|------|------|-----|------|---------|------|------|
| Lot 6     |      |           |          |      |      |         |      |      |      |     |      |         |        |       |        |      |      |      |      |      |     |      |         |      |      |
| Lab 1     | yes  | -         | -        | -    | -    | -       | -    | 2.1  | -    | -   | -    | -       | -      | -     | -      | -2.8 | -2.1 | -2.2 | -    | -    | -   | 1.4  | -       | -0.7 | 0.4  |
| Lab 1     | yes  | -         | -        | -    | -    | -       | -    | 1.9  | -    | -   | -    | -       | -      | -     | -      | -2.7 | -2.0 | -2.0 | -    | -    | -   | 1.4  | -       | -0.6 | 0.5  |
| Lab 2     | no   | -2.2      | -        | -0.1 | -    | -       | -    | -2.8 | -1.4 | -   | -0.7 | no stat | 0.0    | -2.3  | 0.1    | 1.8  | 1.1  | 1.7  | -0.4 | 0.2  | -   | 0.0  | no stat | 0.2  | -0.8 |
| Lab 2     | no   | -2.0      | -        | 0.5  | -    | -       | -    | -2.9 | -1.3 | -   | -0.5 | no stat | 0.1    | -2.3  | 0.2    | 1.3  | 1.6  | 1.6  | -0.7 | 0.1  | -   | 0.4  | no stat | 0.2  | -0.7 |
| Lab 3     | yes  | -         | -        | -    | -    | -       | -    | -    | -    | -   | -1.5 | -       | -      | -     | -      | -4.0 | -2.3 | -    | -1.6 | -    | -   | -1.3 | -       | -0.8 | 0.6  |
| Lab 3     | yes  | -         | -        | -    | -    | -       | -    | -    | -    | -   | -0.6 | -       | -      | -     | -      | -4.0 | -2.2 | -    | -1.6 | -    | -   | -0.5 | -       | -0.6 | -0.1 |
| Lab 4     | yes  | 1.2       | -        | -    | -    | -       | -    | -1.2 | 10.2 | -   | 1.2  | -       | -2.7   | 30.7  | -2.1   | 0.1  | -0.5 | -0.2 | -1.8 | 0.1  | -   | -    | -       | -0.4 | -0.7 |
| Lab 4     | yes  | 0.7       | -        | -    | -    | -       | -    | -0.7 | 11.1 | -   | 1.4  | -       | -2.7   | 28.9  | -1.9   | 0.2  | -0.8 | -0.2 | -1.7 | 0.5  | -   | -    | -       | -0.1 | -0.4 |
| Lab 5     | yes  | -         | -        | -    | -    | -       | -    | 3.5  | -4.8 | -   | -0.2 | -       | -      | 0.4   | 1.8    | 0.7  | 0.2  | -0.2 | -    | -    | -   | -0.5 | -       | -    | 0.0  |
| Lab 5     | yes  | -         | -        | -    | -    | -       | -    | 0.9  | -3.9 | -   | 0.2  | -       | -      | -     | -      | 0.0  | 2.8  | 1.3  | 3.1  | -    | -   | -2.0 | -       | -0.3 | -0.8 |
| Lab 6     | no   | -         | -        | 9.4  | -    | no stat | -    | -    | -0.2 | -   | -    | no stat | -0.9   | 0.0   | 0.9    | 11.0 | 2.5  | -    | 5.0  | -    | -   | 0.4  | -       | -1.8 | -1.3 |
| Lab 6     | no   | -         | -        | -    | -    | -       | -    | -    | -0.9 | -   | -    | no stat | 4.2    | -0.3  | 1.5    | 18.8 | 8.7  | -    | -    | -    | -   | 0.7  | -       | -0.1 | -2.0 |
| Lab 7     | yes  | -         | -        | -    | -    | -       | -    | -    | -    | -   | -    | -       | -      | -     | -      | 0.2  | -0.2 | -    | 0.0  | -    | -   | -    | -       | 3.7  | 1.2  |
| Lab 7     | yes  | -         | -        | -    | -    | -       | -    | -    | -    | -   | -    | -       | -      | -     | -      | 0.7  | 0.2  | -    | -0.9 | -    | -   | -    | -       | 3.0  | 0.8  |
| Lab 8     | no   | 0.7       | no stat  | -    | -    | -       | -    | -1.0 | 0.8  | -   | 11.2 | -       | -      | 14.4  | -      | -0.3 | -0.6 | -    | -3.1 | -3.4 | -   | -1.9 | no stat | -1.4 | -2.8 |
| Lab 8     | no   | -0.2      | no stat  | -    | -    | -       | -    | -0.9 | 1.6  | -   | 11.8 | -       | -      | 18.4  | -      | -5.6 | 1.2  | -    | -3.2 | -2.5 | -   | 0.3  | -       | -0.7 | -2.4 |
| Lab 9     | no   | -         | no stat  | -1.9 | -    | -       | -    | 0.2  | 1.1  | -   | -    | -       | 1.4    | -0.7  | 0.0    | -0.5 | 0.8  | 1.5  | 1.4  | -    | -   | -    | -       | 1.3  | 7.9  |
| Lab 9     | no   | -         | no stat  | -1.9 | -    | -       | -    | 0.0  | 1.6  | -   | -    | -       | 1.7    | -0.5  | 1.5    | 0.3  | 0.2  | 0.1  | 4.8  | -    | -   | -    | -       | 1.9  | 8.2  |
| Lab 10    | no   | -         | -        | -0.8 | -    | -       | -    | 0.4  | -0.2 | -   | -2.2 | -       | -      | -1.5  | -0.9   | -0.1 | -1.3 | -0.7 | 2.6  | -    | -   | -    | -       | 2.2  | 6.7  |
| Lab 10    | no   | -         | -        | 0.3  | -    | -       | -    | 0.3  | -0.3 | -   | -0.3 | -       | -      | -1.5  | -1.0   | -0.5 | -1.0 | -0.7 | 2.7  | -    | -   | -    | -       | 2.4  | 6.6  |



| Lab<br>Code | ISTD | 15-<br>AcDO<br>N | 3-<br>AcDO<br>N | AFB1    | AFB2 | AFG1    | AFG2 | AOH  | BEA  | D3G | DON  | ENN-<br>A | ENN<br>-A1 | ENN-B | ENN<br>-B1 | FB1  | FB2  | FB3  | HT-2 | MON | NIV | OTA     | OTB | T-2  | ZEN  |
|-------------|------|------------------|-----------------|---------|------|---------|------|------|------|-----|------|-----------|------------|-------|------------|------|------|------|------|-----|-----|---------|-----|------|------|
| Lot 7       |      |                  |                 |         |      |         |      |      |      |     |      |           |            |       |            |      |      |      |      |     |     |         |     |      |      |
| Lab 1       | yes  | -                | -               | -       | -    | -       | -    | 2.0  | -    | -   | -    | -         | -          | -     | -          | -2.4 | -2.1 | -2.3 | -    | -   | -   | -       | -   | -0.5 | 0.3  |
| Lab 1       | yes  | -                | -               | -       | -    | -       | -    | 2.2  | -    | -   | -    | -         | -          | -     | -0.6       | -2.4 | -2.1 | -1.9 | -    | -   | -   | -       | -   | -0.4 | 0.8  |
| Lab 2       | no   | -2.0             | -               | no stat | -    | no stat | -    | -2.9 | -1.3 | -   | -0.9 | no stat   | 0.0        | -2.0  | 0.6        | 1.5  | 1.6  | 1.4  | 0.1  | -   | -   | no stat | -   | 0.4  | -0.5 |
| Lab 2       | no   | -2.1             | -               | no stat | -    | no stat | -    | -2.9 | -1.7 | -   | -1.2 | no stat   | -0.8       | -2.2  | 0.2        | 1.6  | 1.2  | 1.8  | 0.6  | -   | -   | no stat | -   | 0.3  | -0.8 |
| Lab 3       | yes  | -                | -               | -       | -    | -       | -    | -    | -    | -   | 0.1  | -         | -          | -     | -          | -3.8 | -2.5 | -    | -1.5 | -   | -   | -       | -   | -1.3 | 0.9  |
| Lab 3       | yes  | -                | -               | -       | -    | -       | -    | -    | -    | -   | 0.8  | -         | -          | -     | -          | -4.0 | -2.4 | -    | -0.6 | -   | -   | -       | -   | -0.1 | 0.7  |
| Lab 4       | yes  | 1.5              | -               | -       | -    | -       | -    | -0.9 | 8.2  | -   | 0.8  | -         | -2.9       | 7.0   | -2.0       | -0.1 | -0.2 | -0.8 | -2.2 | -   | -   | -       | -   | 0.6  | -0.6 |
| Lab 4       | yes  | 0.5              | -               | -       | -    | -       | -    | -1.0 | 11.4 | -   | 0.0  | -         | -2.8       | 6.9   | -1.4       | 0.3  | 0.0  | -0.5 | -1.5 | -   | -   | -       | -   | 0.2  | -0.4 |
| Lab 5       | yes  | 3.4              | -               | -       | -    | -       | -    | 4.3  | -4.9 | -   | -0.1 | -         | -          | -0.3  | 1.6        | -0.1 | -0.3 | -0.8 | -    | -   | -   | -       | -   | -    | 0.6  |
| Lab 5       | yes  | -                | -               | -       | -    | -       | -    | 0.2  | -3.5 | -   | 0.1  | -         | -          | -     | -          | 0.2  | 2.4  | 0.9  | -    | -   | -   | -       | -   | -0.9 | -0.9 |
| Lab 6       | no   | -                | -               | no stat | -    | no stat | -    | -    | -0.6 | -   | -    | no stat   | -1.4       | 0.5   | 1.3        | 11.0 | 4.7  | -    | 5.8  | -   | -   | -       | -   | -1.1 | -0.8 |
| Lab 6       | no   | -                | -               | -       | -    | -       | -    | -    | -0.9 | -   | -    | no stat   | 5.0        | 0.1   | 1.6        | 20.2 | 9.3  | -    | 5.8  | -   | -   | -       | -   | -0.1 | -2.3 |
| Lab 7       | yes  | -                | -               | -       | -    | -       | -    | -    | -    | -   | -    | -         | -          | -     | -          | -0.8 | -1.3 | -    | 0.3  | -   | -   | -       | -   | 3.6  | 1.6  |
| Lab 7       | yes  | -                | -               | -       | -    | -       | -    | -    | -    | -   | -    | -         | -          | -     | -          | -0.5 | -1.3 | -    | 0.1  | -   | -   | -       | -   | 3.3  | 0.9  |
| Lab 8       | no   | -0.3             | no stat         | -       | -    | -       | -    | -1.0 | 0.9  | -   | 8.2  | -         | -          | 1.6   | -          | -0.1 | -0.4 | -    | -3.1 | -   | -   | no stat | -   | -1.6 | -3.0 |
| Lab 8       | no   | -0.7             | no stat         | -       | -    | -       | -    | -0.9 | 1.7  | -   | 9.1  | -         | -          | 3.0   | -          | 2.0  | 1.2  | -    | -3.2 | -   | -   | no stat | -   | -0.7 | -2.6 |
| Lab 9       | no   | -                | no stat         | -       | -    | -       | -    | 0.4  | 1.6  | -   | -    | -         | 2.3        | -1.6  | 1.2        | 0.5  | 1.8  | 1.6  | 1.8  | -   | -   | -       | -   | -0.2 | 0.9  |
| Lab 9       | no   | -                | no stat         | -       | -    | -       | -    | 0.0  | 1.0  | -   | -    | -         | 1.5        | -1.8  | -0.2       | 0.3  | 0.6  | 1.5  | 0.8  | -   | -   | -       | -   | 0.3  | 0.9  |
| Lab 10      | no   | -                | -               | -       | -    | -       | -    | 0.6  | -0.1 | -   | -1.7 | -         | -          | -2.2  | -0.7       | -0.1 | -1.0 | -0.4 | 1.0  | -   | -   | -       | -   | 1.3  | 0.3  |
| Lab 10      | no   | -                | -               | -       | -    | -       | -    | 0.5  | -0.1 | -   | -1.8 | -         | -          | -2.3  | -1.6       | -0.3 | -1.0 | -0.7 | 1.7  | -   | -   | -       | -   | 1.2  | 0.5  |

| Lab<br>Code | ISTD | 15-<br>AcDO<br>N | 3-<br>AcDO<br>N | AFB1    | AFB2 | AFG1 | AFG2 | AOH  | BEA  | D3G | DON  | ENN-<br>A | ENN<br>-A1 | ENN-B | ENN<br>-B1 | FB1  | FB2  | FB3  | HT-2 | MON  | NIV | OTA     | OTB | T-2  | ZEN  |
|-------------|------|------------------|-----------------|---------|------|------|------|------|------|-----|------|-----------|------------|-------|------------|------|------|------|------|------|-----|---------|-----|------|------|
| Lot 8       |      |                  |                 |         |      |      |      |      |      |     |      |           |            |       |            |      |      |      |      |      |     |         |     |      |      |
| Lab 1       | yes  | -                | -               | -       | -    | -    | -    | 2.6  | -    | -   | -    | -         | -          | -     | -          | -2.4 | -2.3 | -2.2 | -    | -    | -   | -       | -   | -0.3 | 0.7  |
| Lab 1       | yes  | -                | -               | -       | -    | -    | -    | 2.9  | -    | -   | -    | -         | -          | -     | -          | -2.5 | -2.0 | -2.0 | -    | -    | -   | -       | -   | -0.2 | 0.2  |
| Lab 2       | no   | -2.2             | -               | no stat | -    | -    | -    | -3.0 | -1.0 | -   | -1.5 | no stat   | 0.4        | -2.2  | 0.4        | 1.6  | 1.5  | 1.5  | -0.9 | -0.3 | -   | no stat | -   | 0.3  | -0.4 |
| Lab 2       | no   | -2.3             | -               | no stat | -    | -    | -    | -2.9 | -1.5 | -   | -2.0 | no stat   | -1.1       | -2.2  | 0.1        | 1.8  | 1.6  | 2.2  | 0.0  | -0.1 | -   | no stat | -   | -0.1 | -0.6 |
| Lab 3       | yes  | -                | -               | -       | -    | -    | -    | -    | -    | -   | 3.1  | -         | -          | -     | -          | -3.9 | -2.4 | -    | -2.0 | -    | -   | -       | -   | -0.4 | 0.4  |
| Lab 3       | yes  | -                | -               | -       | -    | -    | -    | -    | -    | -   | 3.3  | -         | -          | -     | -          | -3.7 | -2.4 | -    | -1.2 | -    | -   | -       | -   | -0.1 | 2.0  |
| Lab 4       | yes  | 1.4              | -               | -       | -    | -    | -    | -0.5 | 7.4  | -   | -1.3 | -         | -3.1       | 19.6  | -2.2       | 0.3  | -0.3 | -0.5 | -1.5 | 1.8  | -   | -       | -   | 0.1  | -1.0 |
| Lab 4       | yes  | 0.8              | -               | -       | -    | -    | -    | -0.6 | 6.0  | -   | -1.3 | -         | -3.3       | 17.4  | -2.4       | 0.0  | -0.7 | -0.8 | -1.1 | 2.0  | -   | -       | -   | -0.3 | -0.8 |
| Lab 5       | yes  | -                | -               | -       | -    | -    | -    | 5.4  | -5.0 | -   | -0.7 | -         | -          | 0.1   | 2.2        | 0.9  | 0.2  | -0.6 | -    | -    | -   | -       | -   | -    | 1.0  |
| Lab 5       | yes  | -                | -               | -       | -    | -    | -    | 1.5  | -4.1 | -   | -0.5 | -         | -          | -     | -          | 0.4  | 3.0  | 1.3  | 3.0  | -    | -   | -       | -   | 0.0  | -0.2 |
| Lab 6       | no   | -                | -               | -       | -    | -    | -    | -    | -0.2 | -   | -    | no stat   | -1.3       | 0.3   | 1.1        | 13.2 | 2.5  | -    | 6.1  | -    | -   | -       | -   | -1.1 | -1.3 |
| Lab 6       | no   | -                | -               | -       | -    | -    | -    | -    | -1.0 | -   | -    | no stat   | 4.4        | -0.5  | 1.2        | 20.5 | 8.3  | -    | 6.1  | -    | -   | -       | -   | -0.1 | -2.2 |
| Lab 7       | yes  | -                | -               | -       | -    | -    | -    | -    | -    | -   | -    | -         | -          | -     | -          | -0.4 | -0.8 | -    | 0.0  | -    | -   | -       | -   | 3.4  | 1.0  |
| Lab 7       | yes  | -                | -               | -       | -    | -    | -    | -    | -    | -   | -    | -         | -          | -     | -          | 0.4  | -0.2 | -    | 0.3  | -    | -   | -       | -   | 3.6  | 1.3  |
| Lab 8       | no   | 0.5              | no stat         | -       | -    | -    | -    | -0.7 | 0.9  | -   | 7.8  | -         | -          | 11.3  | -          | -0.1 | -0.3 | -    | -2.8 | -2.0 | -   | no stat | -   | -1.3 | -2.7 |
| Lab 8       | no   | 0.1              | -               | -       | -    | -    | -    | -1.0 | 1.6  | -   | 8.2  | -         | -          | 14.1  | -          | 0.5  | 1.1  | -    | -2.9 | -1.4 | -   | no stat | -   | -0.3 | -2.3 |
| Lab 9       | no   | -                | -               | -       | -    | -    | -    | -0.6 | 1.0  | -   | -    | -         | 2.0        | -1.9  | 0.0        | -0.2 | 1.1  | 1.3  | 0.3  | -    | -   | -       | -   | 1.0  | 0.9  |
| Lab 9       | no   | -                | -               | -       | -    | -    | -    | -0.1 | 1.6  | -   | -    | -         | 2.0        | -1.7  | 0.2        | -0.2 | 0.7  | 1.6  | 0.7  | -    | -   | -       | -   | 0.0  | 0.7  |
| Lab 10      | no   | -                | -               | -       | -    | -    | -    | 0.7  | -0.2 | -   | -    | -         | -          | -2.2  | -1.0       | -0.7 | -1.4 | -0.8 | 1.1  | -    | -   | -       | -   | 0.9  | 0.5  |
| Lab 10      | no   | -                | -               | -       | -    | -    | -    | 0.8  | -0.3 | -   | -    | -         | -          | -2.3  | -0.4       | -0.5 | -1.1 | -1.0 | 1.3  | -    | -   | -       | -   | 1.1  | 0.7  |

| Lab Cod e | ISTD | 15-AcDO N | 3-AcDO N | AFB1    | AFB2 | AFG1 | AFG2 | AOH  | BEA  | D3G | DON  | ENN-A   | ENN-A1 | ENN-B | ENN-B1 | FB1  | FB2  | FB3  | HT-2 | MON  | NIV | OTA     | OTB | T-2  | ZEN  |
|-----------|------|-----------|----------|---------|------|------|------|------|------|-----|------|---------|--------|-------|--------|------|------|------|------|------|-----|---------|-----|------|------|
| Lot 9     |      |           |          |         |      |      |      |      |      |     |      |         |        |       |        |      |      |      |      |      |     |         |     |      |      |
| Lab 1     | yes  | -         | -        | -       | -    | -    | -    | 2.1  | -    | -   | -    | -       | -      | -     | -      | -2.6 | -2.2 | -2.3 | -    | -    | -   | -       | -   | -0.6 | 0.5  |
| Lab 1     | yes  | -         | -        | -       | -    | -    | -    | 2.1  | -    | -   | -    | -       | -      | -     | -      | -2.2 | -2.1 | -2.3 | -    | -    | -   | -       | -   | -0.4 | 0.4  |
| Lab 2     | no   | -2.5      | -        | no stat | -    | -    | -    | -2.9 | -1.9 | -   | -2.2 | no stat | -0.6   | -2.4  | 0.3    | 1.9  | 1.7  | 2.0  | -0.7 | -0.2 | -   | no stat | -   | -0.6 | -0.7 |
| Lab 2     | no   | -2.1      | -        | no stat | -    | -    | -    | -3.0 | -1.6 | -   | -1.8 | no stat | -0.4   | -2.5  | 0.1    | 1.1  | 1.3  | 1.7  | -0.1 | -0.2 | -   | no stat | -   | -0.2 | -0.8 |
| Lab 3     | yes  | -         | -        | -       | -    | -    | -    | -    | -    | -   | 3.6  | -       | -      | -     | -      | -3.8 | -2.1 | -    | -1.7 | -    | -   | -       | -   | -0.9 | 1.8  |
| Lab 3     | yes  | -         | -        | -       | -    | -    | -    | -    | -    | -   | 4.2  | -       | -      | -     | -      | -3.7 | -2.5 | -    | -0.9 | -    | -   | -       | -   | 0.5  | 1.3  |
| Lab 4     | yes  | 0.8       | -        | -       | -    | -    | -    | -0.5 | 7.4  | -   | -1.4 | -       | -3.0   | 17.2  | -2.2   | 0.2  | -0.6 | -0.7 | -2.1 | 1.7  | -   | -       | -   | 0.6  | -0.5 |
| Lab 4     | yes  | 1.8       | -        | -       | -    | -    | -    | -0.5 | 8.0  | -   | -1.4 | -       | -3.1   | 16.8  | -2.1   | 0.1  | -0.4 | -0.4 | -1.4 | 2.5  | -   | -       | -   | 0.5  | -0.7 |
| Lab 5     | yes  | -         | -        | -       | -    | -    | -    | 4.2  | -5.0 | -   | -0.9 | -       | -      | -0.2  | 2.1    | 0.9  | 0.3  | -0.3 | -    | -    | -   | -       | -   | -    | 0.8  |
| Lab 5     | yes  | -         | -        | -       | -    | -    | -    | 1.3  | -4.4 | -   | -0.5 | -       | -      | -     | -      | 0.3  | 2.8  | 1.1  | 2.9  | -    | -   | -       | -   | -0.4 | -0.4 |
| Lab 6     | no   | -         | -        | -       | -    | -    | -    | -    | -0.4 | -   | -    | no stat | -1.0   | 0.0   | 1.6    | 14.3 | 4.6  | -    | 5.1  | -    | -   | -       | -   | -1.0 | -0.7 |
| Lab 6     | no   | -         | -        | -       | -    | -    | -    | -    | -1.0 | -   | -    | no stat | 4.7    | -0.5  | 1.8    | 23.1 | 8.9  | -    | -    | -    | -   | -       | -   | -0.1 | -2.1 |
| Lab 7     | yes  | -         | -        | -       | -    | -    | -    | -    | -    | -   | -    | -       | -      | -     | -      | 1.3  | 0.4  | -    | 0.1  | -    | -   | -       | -   | 3.9  | 0.7  |
| Lab 7     | yes  | -         | -        | -       | -    | -    | -    | -    | -    | -   | -    | -       | -      | -     | -      | 0.2  | -0.5 | -    | 0.3  | -    | -   | -       | -   | 3.2  | 0.5  |
| Lab 8     | no   | 0.7       | no stat  | -       | -    | -    | -    | -0.9 | 1.4  | -   | 8.7  | -       | -      | 12.9  | -      | 0.1  | -0.4 | -    | -2.7 | -2.3 | -   | no stat | -   | -1.2 | -2.7 |
| Lab 8     | no   | 0.0       | no stat  | -       | -    | -    | -    | -1.3 | 1.4  | -   | 9.2  | -       | -      | 13.5  | -      | 1.6  | 1.4  | -    | -2.9 | -1.5 | -   | no stat | -   | -0.7 | -2.5 |
| Lab 9     | no   | -         | -        | -       | -    | -    | -    | -0.2 | 1.7  | -   | -    | -       | 2.3    | -2.0  | 0.3    | -0.4 | 0.1  | 1.7  | 1.3  | -    | -   | -       | -   | 0.5  | 0.7  |
| Lab 9     | no   | -         | -        | -       | -    | -    | -    | 0.0  | 1.8  | -   | -    | -       | 1.6    | -1.9  | 0.3    | -0.5 | 0.0  | 1.6  | 1.5  | -    | -   | -       | -   | -0.1 | 0.7  |
| Lab 10    | no   | -         | -        | -       | -    | -    | -    | 0.3  | -0.2 | -   | -    | -       | -      | -2.6  | -1.4   | -1.3 | -1.7 | -1.0 | 1.5  | -    | -   | -       | -   | 1.1  | 0.5  |
| Lab 10    | no   | -         | -        | -       | -    | -    | -    | 0.3  | -0.3 | -   | -    | -       | -      | -2.5  | -0.8   | -1.2 | -1.7 | -1.1 | 1.7  | -    | -   | -       | -   | 0.8  | 0.7  |

| Lab Cod e | ISTD | 15-AcDO N | 3-AcDO N | AFB1 | AFB2    | AFG1 | AFG2 | AOH  | BEA  | D3G | DON  | ENN-A   | ENN-A1 | ENN-B | ENN-B1 | FB1  | FB2  | FB3  | HT-2 | MON  | NIV | OTA  | OTB     | T-2  | ZEN  |
|-----------|------|-----------|----------|------|---------|------|------|------|------|-----|------|---------|--------|-------|--------|------|------|------|------|------|-----|------|---------|------|------|
| Lot 10    |      |           |          |      |         |      |      |      |      |     |      |         |        |       |        |      |      |      |      |      |     |      |         |      |      |
| Lab 1     | yes  | -         | -        | -    | -       | -    | -    | -    | -    | -   | -    | -       | -      | -     | -      | -0.9 | -1.4 | -1.2 | -0.3 | -0.1 | -   | 1.4  | -       | -0.6 | -    |
| Lab 1     | yes  | -         | -        | -    | -       | -    | -    | -    | -    | -   | -    | -       | -      | -     | -      | -1.0 | -1.1 | -1.1 | 0.2  | 0.0  | -   | 1.9  | -       | -0.4 | -    |
| Lab 2     | no   | -         | -        | 0.4  | no stat | -0.1 | -    | -3.3 | -0.4 | -   | -3.8 | no stat | -0.5   | -0.2  | 0.5    | 4.2  | 1.2  | 4.1  | 1.2  | 0.4  | -   | -0.4 | -       | 0.1  | -2.4 |
| Lab 2     | no   | -         | -        | 0.2  | no stat | 0.9  | -    | -3.4 | -1.0 | -   | -3.4 | no stat | 0.3    | 0.4   | 1.7    | 2.8  | 0.6  | 2.7  | 1.0  | 0.0  | -   | -0.2 | -       | -0.4 | -1.5 |
| Lab 3     | yes  | -         | -        | -    | -       | -    | -    | -    | -    | -   | 3.7  | -       | -      | -     | -      | -3.3 | -    | -    | -0.6 | -    | -   | -1.5 | -       | 0.0  | 9.2  |
| Lab 3     | yes  | -         | -        | -    | -       | -    | -    | -    | -    | -   | 3.8  | -       | -      | -     | -      | -3.3 | -    | -    | -0.7 | -    | -   | 0.2  | -       | 1.3  | 17.8 |
| Lab 4     | yes  | -         | -        | -    | -       | -    | -    | 2.6  | -3.4 | -   | -    | -       | -      | -1.4  | -2.9   | -0.1 | -0.5 | -0.5 | -1.2 | 2.0  | -   | 15.5 | -       | 0.8  | 0.0  |
| Lab 4     | yes  | -         | -        | -    | -       | -    | -    | 3.6  | -1.6 | -   | -    | -       | -      | -1.4  | -2.7   | -0.1 | -0.5 | -0.6 | -1.1 | 2.0  | -   | 17.3 | -       | 0.2  | -0.7 |
| Lab 5     | yes  | -         | -        | 0.5  | -       | -    | -    | 5.7  | -4.3 | -   | -3.2 | -       | -      | 0.9   | -      | -0.2 | -0.9 | -    | -    | -1.4 | -   | 0.9  | -       | -    | -    |
| Lab 5     | yes  | -         | -        | -    | -       | -    | -    | 5.8  | -4.0 | -   | -3.0 | -       | -      | -1.3  | -      | -0.1 | 0.8  | 0.5  | 1.4  | -    | -   | -0.2 | -       | 0.3  | -    |
| Lab 6     | no   | -         | -        | -    | -       | 0.9  | -    | -    | 1.4  | -   | -    | no stat | -1.0   | 5.3   | 1.5    | 15.5 | 4.5  | -    | 5.1  | -    | -   | -    | -       | -1.2 | -    |
| Lab 6     | no   | -         | -        | 2.9  | -       | 7.8  | -    | -    | -0.5 | -   | -    | no stat | 0.7    | 1.5   | 1.3    | 17.3 | 5.0  | -    | 8.0  | -    | -   | 0.4  | no stat | -0.2 | -    |
| Lab 7     | yes  | -         | -        | -1.3 | -       | -    | -    | -    | -    | -   | -    | -       | -      | -     | -      | -0.3 | -1.5 | -    | 0.2  | -    | -   | -    | -       | 2.2  | -    |
| Lab 7     | yes  | -         | -        | -0.9 | -       | -    | -    | -    | -    | -   | -    | -       | -      | -     | -      | 0.0  | -1.6 | -    | 0.9  | -    | -   | -    | -       | 3.2  | -    |
| Lab 8     | no   | no stat   | no stat  | -    | -       | -    | -    | -1.7 | 1.6  | -   | 3.3  | -       | -      | -     | -      | 0.4  | -1.4 | -    | -3.0 | -1.9 | -   | -1.8 | -       | -1.9 | -    |
| Lab 8     | no   | no stat   | no stat  | -    | -       | -    | -    | -1.8 | 5.2  | -   | 2.6  | -       | -      | -     | -      | 1.2  | 0.2  | -    | -2.7 | -1.1 | -   | 2.1  | -       | -0.5 | -    |
| Lab 9     | no   | -         | -        | -0.9 | -       | -    | -    | -0.9 | 3.0  | -   | -    | -       | 0.6    | 0.7   | 1.1    | -0.1 | 0.9  | -0.2 | 0.0  | -    | -   | -1.5 | -       | 0.3  | 1.6  |
| Lab 9     | no   | -         | -        | -0.2 | -       | -    | -    | -0.2 | 3.8  | -   | -    | -       | 0.9    | 0.4   | 0.6    | 0.5  | 1.3  | 0.9  | 0.2  | -    | -   | -2.1 | -       | 0.4  | 0.9  |
| Lab 10    | no   | -         | -        | 0.0  | -       | -3.2 | -    | -0.4 | 0.4  | -   | -    | -       | -      | -1.1  | -2.1   | -0.4 | 0.0  | -0.2 | -0.8 | -    | -   | -2.9 | -       | -0.5 | -1.0 |
| Lab 10    | no   | -         | -        | 0.8  | -       | -3.0 | -    | -2.0 | 0.5  | -   | -    | -       | -      | -1.2  | -1.3   | -0.3 | -0.4 | -0.5 | -0.5 | -    | -   | -2.8 | -       | -0.7 | -1.1 |

### 3.3. Overview of individual z-score data for chicken feed matrix

**Table S8:** Summary of z-score performance of 10 chicken feed matrices. Acceptable, questionable and unacceptable z-scores are colored in green, yellow and red respectively. No-stat information refers to positive findings where a z-score calculation was not feasible due to a reduced number of reported results.

| Information refers to positive findings where a score calculation was not feasible due to a reduced number of reported results. |      |          |         |      |      |      |      |      |      |      |      |       |        |       |        |      |      |         |      |      |         |      |     |      |      |  |
|---------------------------------------------------------------------------------------------------------------------------------|------|----------|---------|------|------|------|------|------|------|------|------|-------|--------|-------|--------|------|------|---------|------|------|---------|------|-----|------|------|--|
| Lab Code                                                                                                                        | ISTD | 15-AcDON | 3-AcDON | AFB1 | AFB2 | AFG1 | AFG2 | AOH  | BEA  | D3G  | DON  | ENN-A | ENN-A1 | ENN-B | ENN-B1 | FB1  | FB2  | FB3     | HT-2 | MON  | NIV     | OTA  | OTB | T-2  | ZEN  |  |
|                                                                                                                                 |      | Lot 1    |         |      |      |      |      |      |      |      |      |       |        |       |        |      |      |         |      |      |         |      |     |      |      |  |
| Lab 1                                                                                                                           | yes  | -        | -       | -    | -    | -    | -    | -    | -1.0 | -    | 0.8  | -     | -      | -     | -1.3   | -1.3 | -1.8 | -       | 1.5  | 0.0  | -       | -    | -   | -0.1 | 0.5  |  |
| Lab 1                                                                                                                           | yes  | -        | -       | -    | -    | -    | -    | -    | 0.7  | -    | -    | -     | -      | -     | -1.3   | -1.5 | -1.6 | -       | 2.2  | -0.1 | -       | -    | -   | 0.1  | 0.5  |  |
| Lab 2                                                                                                                           | no   | 0.7      | no stat | -    | -    | -    | -    | -2.3 | -1.7 | -1.3 | -2.8 | -1.2  | -1.0   | -2.7  | -1.8   | 0.2  | 2.5  | no stat | 5.1  | 2.3  | no stat | -4.2 | -   | 4.5  | -1.6 |  |
| Lab 2                                                                                                                           | no   | 0.0      | no stat | -    | -    | -    | -    | -3.1 | -1.6 | -0.6 | -2.2 | -1.1  | -1.0   | -2.4  | -1.7   | 2.1  | 2.6  | no stat | 1.0  | 2.7  | no stat | -4.2 | -   | 1.6  | -1.4 |  |
| Lab 3                                                                                                                           | yes  | -        | -       | -    | -    | -    | -    | -    | -    | -    | -1.5 | -     | -      | -     | -      | -3.0 | -3.0 | -       | 0.4  | -    | -       | -4.1 | -   | -0.6 | -0.9 |  |
| Lab 3                                                                                                                           | yes  | -        | -       | -    | -    | -    | -    | -    | -    | -    | -1.6 | -     | -      | -     | -      | -2.7 | -2.8 | -       | -1.6 | -    | -       | -4.1 | -   | -0.8 | -1.2 |  |
| Lab 4                                                                                                                           | yes  | -        | -       | -    | -    | -    | -    | -2.5 | 12.8 | 0.1  | 2.9  | 0.3   | -1.8   | -1.9  | -2.4   | -0.3 | -0.9 | no stat | -1.5 | -0.5 | -       | 5.4  | -   | 2.2  | 1.5  |  |
| Lab 4                                                                                                                           | yes  | -        | -       | -    | -    | -    | -    | -2.7 | 11.8 | -0.4 | 2.4  | -0.3  | -2.2   | -2.0  | -2.3   | -0.2 | -1.4 | no stat | -1.9 | -0.3 | -       | 7.0  | -   | 2.0  | 1.7  |  |
| Lab 5                                                                                                                           | yes  | -        | -       | -    | -    | -    | -    | 3.8  | -2.6 | 1.2  | 0.0  | -     | -      | -0.7  | 1.2    | 0.9  | -0.3 | -       | -    | -    | -       | -    | -   | -    | 0.9  |  |
| Lab 5                                                                                                                           | yes  | -        | -       | -    | -    | -    | -    | 2.1  | -2.6 | 1.0  | -0.2 | -     | -      | -3.6  | -      | 0.8  | 0.5  | -       | -    | -    | -       | -    | -   | -    | 2.7  |  |
| Lab 6                                                                                                                           | no   | -        | -       | -    | -    | -    | -    | -    | -0.6 | -    | -0.8 | 1.2   | 1.0    | 1.7   | -0.2   | 11.4 | 8.1  | -       | -    | -    | -       | -    | -   | -0.1 | 7.7  |  |
| Lab 6                                                                                                                           | no   | -        | -       | -    | -    | -    | -    | -0.9 | -0.2 | -    | -0.6 | 1.2   | 1.0    | 0.5   | -0.7   | 11.4 | 11.3 | -       | 7.5  | -    | -       | -    | -   | 0.6  | 0.1  |  |
| Lab 7                                                                                                                           | yes  | -        | -       | -    | -    | -    | -    | -    | -    | -    | 5.1  | -     | -      | -     | -      | 2.5  | 2.4  | -       | -    | -    | -       | -    | -   | -    | 0.8  |  |
| Lab 7                                                                                                                           | yes  | -        | -       | -    | -    | -    | -    | -    | -    | -    | 1.0  | -     | -      | -     | -      | -2.3 | -2.0 | -       | -    | -    | -       | -    | -   | -    | -0.3 |  |
| Lab 8                                                                                                                           | no   | -1.0     | no stat | -    | -    | -    | -    | -0.3 | 9.6  | -    | -3.3 | -     | 9.7    | -1.4  | 0.2    | -0.8 | 0.2  | -       | -1.0 | -0.7 | -       | 2.5  | -   | -0.3 | -1.0 |  |
| Lab 8                                                                                                                           | no   | -0.3     | no stat | -    | -    | -    | -    | 0.1  | 9.3  | -    | -2.9 | -     | 9.5    | -1.4  | 0.0    | -0.9 | -0.4 | -       | -1.0 | -    | -       | 2.5  | -   | 0.1  | -1.2 |  |
| Lab 9                                                                                                                           | no   | 0.8      | -       | -    | -    | -    | -    | 0.4  | 0.8  | -    | 1.6  | -     | 0.4    | 14.3  | 2.4    | 0.1  | -    | -       | 0.4  | -    | -       | -    | -   | -0.1 | -0.1 |  |
| Lab 9                                                                                                                           | no   | -0.8     | -       | -    | -    | -    | -    | 0.2  | 0.8  | -    | 1.3  | -     | -0.5   | 13.0  | 2.2    | 0.6  | -    | -       | -0.5 | -    | -       | -    | -   | -1.0 | -0.3 |  |
| Lab 10                                                                                                                          | no   | 0.5      | -       | -    | -    | -    | -    | 0.7  | -0.7 | -    | 1.5  | -     | -      | 10.5  | 3.2    | -0.1 | -    | -       | -0.8 | -    | -       | -    | -   | -0.2 | -0.8 |  |
| Lab 10                                                                                                                          | no   | 0.2      | -       | -    | -    | -    | -    | 0.7  | -0.7 | -    | 1.1  | -     | -      | 9.5   | 2.9    | 0.5  | -    | -       | -1.3 | -    | -       | -    | -   | -0.3 | -0.8 |  |

| Lab Code | ISTD | 15-AcDON | 3-AcDON | AFB1    | AFB2 | AFG1    | AFG2 | AOH  | BEA  | D3G     | DON  | ENN-A | ENN-A1 | ENN-B | ENN-B1 | FB1  | FB2  | FB3 | HT-2    | MON     | NIV     | OTA     | OTB     | T-2  | ZEN  |
|----------|------|----------|---------|---------|------|---------|------|------|------|---------|------|-------|--------|-------|--------|------|------|-----|---------|---------|---------|---------|---------|------|------|
|          |      | Lot 2    |         |         |      |         |      |      |      |         |      |       |        |       |        |      |      |     |         |         |         |         |         |      |      |
| Lab 1    | yes  | -        | -       | -       | -    | -       | -    | -    | -0.1 | -       | -    | -     | 0.4    | -     | -0.4   | -2.1 | -    | -   | -       | 0.7     | -       | -       | -       | -    | -0.4 |
| Lab 1    | yes  | -        | -       | -       | -    | -       | -    | -    | 2.0  | -       | -    | -     | 0.4    | -     | -0.2   | -2.2 | -    | -   | -       | 0.8     | -       | -       | -       | -    | -0.3 |
| Lab 2    | no   | -        | -       | no stat | -    | no stat | -    | -2.3 | -1.2 | no stat | -0.2 | -1.0  | -0.5   | -1.6  | -0.1   | 1.2  | 0.2  | -   | -0.8    | no stat | no stat | no stat | no stat | -2.6 | -2.1 |
| Lab 2    | no   | -        | -       | no stat | -    | no stat | -    | -1.1 | -1.9 | no stat | -0.4 | -1.0  | -0.1   | -1.3  | 0.6    | 1.0  | -1.0 | -   | 2.5     | no stat | no stat | no stat | no stat | 0.2  | -2.0 |
| Lab 3    | yes  | -        | -       | no stat | -    | -       | -    | -    | -    | -       | -0.6 | -     | -      | -     | -      | -3.5 | -3.9 | -   | no stat | -       | -       | no stat | -       | -1.9 | 3.0  |
| Lab 3    | yes  | -        | -       | no stat | -    | -       | -    | -    | -    | -       | -0.8 | -     | -      | -     | -      | -3.4 | -3.9 | -   | no stat | -       | -       | no stat | -       | -2.2 | 3.6  |
| Lab 4    | yes  | -        | -       | -       | -    | -       | -    | -    | -3.0 | -       | 3.5  | -     | -3.6   | -1.9  | -2.9   | 0.5  | -    | -   | -       | -1.6    | -       | -       | -       | 0.5  | -0.6 |
| Lab 4    | yes  | -        | -       | -       | -    | -       | -    | -    | -2.6 | -       | 1.9  | -     | -3.5   | -1.8  | -2.9   | 0.6  | -    | -   | -       | -1.6    | -       | -       | -       | 0.1  | 0.0  |
| Lab 5    | yes  | -        | -       | -       | -    | -       | -    | -    | -3.5 | -       | 2.3  | -     | 1.6    | 1.9   | 4.6    | 0.5  | -    | -   | -       | -       | -       | -       | -       | -    | -    |
| Lab 5    | yes  | -        | -       | -       | -    | -       | -    | -    | -3.4 | -       | 0.5  | -     | -      | -2.8  | -2.5   | -    | -    | -   | -       | -       | -       | -       | -       | -    | -    |
| Lab 6    | no   | -        | -       | -       | -    | no stat | -    | -    | -1.3 | -       | -    | 1.0   | 1.2    | 3.4   | 1.5    | 15.7 | 12.1 | -   | -       | -       | -       | -       | -       | -    | -    |
| Lab 6    | no   | -        | -       | -       | -    | -       | -    | -    | -1.1 | -       | -    | 1.5   | 2.2    | 4.0   | 2.2    | -    | 16.1 | -   | -       | -       | -       | -       | -       | 5.2  | 4.3  |
| Lab 7    | yes  | -        | -       | -       | -    | -       | -    | -    | -    | -       | -    | -     | -      | -     | -      | -    | -    | -   | -       | -       | -       | -       | -       | -    | -    |
| Lab 7    | yes  | -        | -       | -       | -    | -       | -    | -    | -    | -       | -    | -     | -      | -     | -      | -    | -    | -   | -       | -       | -       | -       | -       | -    | -    |
| Lab 8    | no   | no stat  | no stat | no stat | -    | no stat | -    | 14.5 | 3.0  | -       | -2.0 | -     | 3.6    | -0.7  | 0.1    | -0.2 | -0.2 | -   | no stat | -       | -       | no stat | no stat | -0.2 | 0.3  |
| Lab 8    | no   | no stat  | no stat | no stat | -    | no stat | -    | 17.4 | 3.5  | -       | -1.2 | -     | 4.2    | 1.5   | 2.0    | 0.1  | -0.2 | -   | no stat | -       | -       | no stat | no stat | -0.1 | 0.4  |
| Lab 9    | no   | -        | -       | -       | -    | -       | -    | 1.5  | 2.5  | -       | -    | -0.1  | -0.3   | 1.1   | 0.0    | -    | -    | -   | -       | -       | -       | -       | -       | 1.6  | -0.3 |
| Lab 9    | no   | -        | -       | -       | -    | -       | -    | -0.2 | 3.8  | -       | -    | 0.2   | -0.5   | 0.9   | 0.0    | -    | -    | -   | -       | -       | -       | -       | -       | 0.0  | -0.1 |
| Lab 10   | no   | -        | -       | -       | -    | -       | -    | -1.3 | 1.8  | -       | -    | 0.2   | -2.2   | -0.5  | -0.6   | -    | -    | -   | no stat | -       | -       | -       | -       | -0.2 | 0.5  |
| Lab 10   | no   | -        | -       | -       | -    | -       | -    | -2.2 | 1.5  | -       | -    | -0.9  | -2.0   | -0.2  | -0.5   | -    | -    | -   | no stat | -       | -       | -       | -       | 0.7  | -0.1 |

| Lab<br>Cod<br>e | ISTD | 15-<br>AcDO<br>N | 3-<br>AcDO<br>N | AFB1    | AFB2 | AFG1    | AFG2 | AOH  | BEA  | D3G     | DON  | ENN-A | ENN<br>-A1 | ENN-B | ENN<br>-B1 | FB1     | FB2  | FB3 | HT-2    | MON  | NIV     | OTA  | OTB  | T-2  | ZEN  |
|-----------------|------|------------------|-----------------|---------|------|---------|------|------|------|---------|------|-------|------------|-------|------------|---------|------|-----|---------|------|---------|------|------|------|------|
|                 |      | Lot 3            |                 |         |      |         |      |      |      |         |      |       |            |       |            |         |      |     |         |      |         |      |      |      |      |
| Lab 1           | yes  | -                | -               | -       | -    | -       | -    | -    | 0.3  | -       | -    | -     | 0.9        | -     | -0.6       | -       | -    | -   | -       | -0.2 | -       | -0.6 | -0.4 | -    | 0.1  |
| Lab 1           | yes  | -                | -               | -       | -    | -       | -    | -    | 0.7  | -       | -    | -     | 0.9        | -     | -0.5       | -       | -    | -   | -       | -0.2 | -       | -0.2 | -0.5 | -    | -0.2 |
| Lab 2           | no   | -                | -               | no stat | -    | no stat | -    | -1.2 | -1.7 | no stat | -0.8 | 0.2   | -0.5       | -1.4  | 0.0        | no stat | 0.4  | -   | -       | 1.2  | no stat | -1.6 | 0.5  | -1.5 | -1.9 |
| Lab 2           | no   | -                | -               | no stat | -    | no stat | -    | -1.3 | -1.6 | no stat | -0.1 | 0.2   | 0.1        | -1.6  | -0.1       | no stat | -0.4 | -   | -       | 1.0  | no stat | -0.9 | -0.1 | -1.2 | -1.9 |
| Lab 3           | yes  | -                | -               | no stat | -    | -       | -    | -    | -    | -       | -1.4 | -     | -          | -     | -          | no stat | -3.5 | -   | no stat | -    | -       | -1.8 | -    | 1.0  | -0.6 |
| Lab 3           | yes  | -                | -               | no stat | -    | -       | -    | -    | -    | -       | -1.4 | -     | -          | -     | -          | no stat | -3.6 | -   | no stat | -    | -       | -1.8 | -    | 1.8  | -0.3 |
| Lab 4           | yes  | -                | -               | -       | -    | -       | -    | -    | 4.8  | -       | 1.7  | -1.0  | -3.0       | -2.1  | -2.7       | -       | -1.1 | -   | -       | -0.9 | -       | 10.1 | -    | -    | 0.2  |
| Lab 4           | yes  | -                | -               | -       | -    | -       | -    | -    | 4.8  | -       | 2.0  | -1.1  | -3.1       | -2.0  | -2.7       | -       | -1.9 | -   | -       | -1.0 | -       | 8.9  | -    | -    | 0.0  |
| Lab 5           | yes  | -                | -               | -       | -    | -       | -    | -    | -3.2 | -       | 1.3  | -     | 0.6        | 0.0   | 2.3        | -       | -    | -   | -       | -    | -       | 1.2  | 0.8  | -    | 0.7  |
| Lab 5           | yes  | -                | -               | -       | -    | -       | -    | -    | -2.6 | -       | 2.1  | -     | -          | -2.1  | -2.0       | -       | -    | -   | -       | -    | -       | 0.3  | 9.1  | -    | 1.2  |
| Lab 6           | no   | -                | -               | -       | -    | -       | -    | -    | -1.2 | -       | -    | 0.0   | -0.6       | 1.4   | 0.6        | -       | 15.5 | -   | -       | -    | -       | 1.7  | 0.0  | -    | 1.3  |
| Lab 6           | no   | -                | -               | -       | -    | -       | -    | -    | -1.5 | -       | -    | 2.3   | 0.2        | 0.9   | -0.1       | -       | 16.4 | -   | -       | -    | -       | 0.5  | 0.9  | -    | 0.2  |
| Lab 7           | yes  | -                | -               | -       | -    | -       | -    | -    | -    | -       | -    | -     | -          | -     | -          | -       | -    | -   | -       | -    | -       | -    | -    | -    | 1.9  |
| Lab 7           | yes  | -                | -               | -       | -    | -       | -    | -    | -    | -       | -    | -     | -          | -     | -          | -       | -    | -   | -       | -    | -       | -    | -    | -    | 1.7  |
| Lab 8           | no   | no stat          | no stat         | no stat | -    | no stat | -    | 30.5 | 2.1  | -       | -2.1 | -     | 5.7        | -0.3  | 0.5        | no stat | 1.4  | -   | no stat | -    | -       | 8.2  | 9.2  | 2.9  | -1.5 |
| Lab 8           | no   | no stat          | no stat         | no stat | -    | no stat | -    | 31.4 | 2.1  | -       | -1.8 | -     | 5.3        | -1.0  | -0.1       | no stat | 1.5  | -   | no stat | -    | -       | 10.8 | 14.2 | 2.7  | -1.4 |
| Lab 9           | no   | -                | -               | -       | -    | -       | -    | -1.7 | 0.0  | -       | -    | -0.4  | -1.2       | 2.5   | 0.2        | -       | -    | -   | -       | -    | -       | -1.1 | -3.2 | -    | 0.6  |
| Lab 9           | no   | -                | -               | -       | -    | -       | -    | 0.0  | 0.5  | -       | -    | 0.6   | -0.9       | 2.3   | 0.5        | -       | -    | -   | -       | -    | -       | -2.3 | -3.0 | -    | 0.3  |
| Lab 10          | no   | -                | -               | no stat | -    | -       | -    | -0.7 | 0.0  | -       | 0.6  | 0.6   | -          | 1.9   | 1.1        | -       | -    | -   | -       | -    | -       | -2.0 | -3.6 | -2.6 | -0.4 |
| Lab 10          | no   | -                | -               | no stat | -    | -       | -    | 1.0  | -0.3 | -       | -0.1 | -0.5  | -          | 1.5   | 1.1        | -       | -    | -   | -       | -    | -       | -2.1 | -3.7 | -3.2 | -0.5 |

[illegible]

| Lab<br>Cod<br>e | ISTD | 15-<br>AcDO<br>N | 3-<br>AcDO<br>N | AFB1    | AFB2 | AFG1 | AFG2 | AOH  | BEA  | D3G     | DON  | ENN-A | ENN<br>-A1 | ENN-B | ENN<br>-B1 | FB1  | FB2  | FB3 | HT-2 | MON     | NIV     | OTA     | OTB | T-2  | ZEN  |     |
|-----------------|------|------------------|-----------------|---------|------|------|------|------|------|---------|------|-------|------------|-------|------------|------|------|-----|------|---------|---------|---------|-----|------|------|-----|
|                 |      | Lot 5            |                 |         |      |      |      |      |      |         |      |       |            |       |            |      |      |     |      |         |         |         |     |      |      |     |
| Lab 1           | yes  | -                | -               | -       | -    | -    | -    | -    | -1.6 | -       | -    | -     | -          | -     | -2.1       | -3.0 | -    | -   | -    | -       | -       | -       | -   | -    | -0.6 |     |
| Lab 1           | yes  | -                | -               | -       | -    | -    | -    | -    | -2.3 | -       | -    | -     | -          | -     | -1.6       | -3.0 | -    | -   | -    | -       | -       | -       | -   | -    | -0.8 |     |
| Lab 2           | no   | -1.1             | -               | -       | -    | -    | -    | -1.1 | -2.7 | no stat | -3.0 | -1.6  | -1.4       | -2.7  | -1.5       | -1.4 | -0.9 | -   | -    | no stat | no stat | -       | -   | -1.8 | -2.9 |     |
| Lab 2           | no   | -0.7             | -               | -       | -    | -    | -    | -1.6 | -3.0 | no stat | -2.7 | -1.4  | -1.4       | -2.8  | -1.5       | -1.4 | 0.2  | -   | -    | no stat | no stat | -       | -   | -2.0 | -2.6 |     |
| Lab 3           | yes  | -                | -               | -       | -    | -    | -    | -    | -    | -       | -2.4 | -     | -          | -     | -          | -3.3 | -3.7 | -   | 0.0  | -       | -       | no stat | -   | -2.3 | -1.2 |     |
| Lab 3           | yes  | -                | -               | -       | -    | -    | -    | -    | -    | -       | -2.6 | -     | -          | -     | -          | -3.8 | -3.8 | -   | -0.7 | -       | -       | no stat | -   | -2.2 | -1.4 |     |
| Lab 4           | yes  | -                | -               | -       | -    | -    | -    | -0.3 | 3.2  | -       | -0.1 | -     | -2.3       | -1.6  | -2.0       | -    | -    | -   | -    | no stat | -       | -       | -   | -    | 1.1  |     |
| Lab 4           | yes  | -                | -               | -       | -    | -    | -    | -0.1 | 1.8  | -       | -0.4 | -     | -2.7       | -1.9  | -2.3       | -    | -    | -   | -    | no stat | -       | -       | -   | -    | 0.6  |     |
| Lab 5           | yes  | -                | -               | -       | -    | -    | -    | 7.5  | -3.4 | -       | -1.4 | -     | 1.8        | -0.1  | 3.4        | -1.6 | -    | -   | -    | -       | -       | -       | -   | -    | 0.0  |     |
| Lab 5           | yes  | -                | -               | -       | -    | -    | -    | 6.9  | -3.8 | -       | -1.4 | -     | -          | -2.8  | -2.7       | -1.8 | -    | -   | -    | -       | -       | -       | -   | -    | 3.0  |     |
| Lab 6           | no   | -                | -               | -       | -    | -    | -    | -    | -2.5 | -       | -    | -     | -0.9       | -0.1  | -0.5       | 7.0  | 9.9  | -   | -    | -       | -       | -       | -   | -    | 0.0  |     |
| Lab 6           | no   | -                | -               | -       | -    | -    | -    | -    | -2.0 | -       | 0.1  | 2.3   | 0.5        | 0.9   | 0.7        | 7.9  | 11.2 | -   | -    | -       | -       | -       | -   | 5.4  | -0.4 |     |
| Lab 7           | yes  | -                | -               | -       | -    | -    | -    | -    | -    | -       | 1.5  | -     | -          | -     | -          | -    | -    | -   | -    | -       | -       | -       | -   | -    | -    |     |
| Lab 7           | yes  | -                | -               | -       | -    | -    | -    | -    | -    | -       | 1.1  | -     | -          | -     | -          | -    | -    | -   | -    | -       | -       | -       | -   | -    | -    |     |
| Lab 8           | no   | -1.6             | -3.6            | -       | -    | -    | -    | 4.0  | -0.8 | -       | -3.0 | -     | 9.4        | -1.2  | 0.7        | -1.2 | -0.1 | -   | 2.9  | -       | -       | -       | -   | 1.6  | -2.1 |     |
| Lab 8           | no   | -1.8             | -3.7            | -       | -    | -    | -    | 3.8  | -0.6 | -       | -3.7 | -     | 9.5        | -1.0  | 0.9        | -1.5 | -0.3 | -   | 2.5  | -       | -       | -       | -   | 0.4  | -2.5 |     |
| Lab 9           | no   | 0.7              | 3.3             | -       | -    | -    | -    | -0.5 | 7.0  | -       | 15.0 | 1.3   | 0.0        | 4.5   | 1.7        | 5.7  | -    | -   | -    | -       | -       | -       | -   | 1.4  | 3.4  |     |
| Lab 9           | no   | 1.5              | 3.7             | -       | -    | -    | -    | -0.9 | 8.9  | -       | 15.4 | 0.7   | 0.3        | 4.8   | 2.1        | 6.2  | -    | -   | -    | -       | -       | -       | -   | 0.5  | 3.5  |     |
| Lab 10          | no   | 1.2              | 0.1             | no stat | -    | -    | -    | -1.2 | 6.1  | no stat | 16.1 | -     | -          | 4.7   | 2.6        | 4.2  | -    | -   | -    | -2.4    | -       | -       | -   | -    | 0.4  | 1.6 |
| Lab 10          | no   | 1.7              | 0.2             | no stat | -    | -    | -    | -1.8 | 5.5  | no stat | 14.7 | -     | -          | 4.2   | 2.1        | 4.5  | -    | -   | -    | -2.2    | -       | -       | -   | -    | 1.0  | 1.7 |

[illegible]

| Lab<br>Cod<br>e | ISTD | 15-<br>AcDO<br>N | 3-<br>AcDO<br>N | AFB1    | AFB2    | AFG1    | AFG2    | AOH  | BEA  | D3G  | DON  | ENN-<br>A | ENN<br>-A1 | ENN-B | ENN<br>-B1 | FB1  | FB2  | FB3  | HT-2    | MON  | NIV     | OTA     | OTB  | T-2  | ZEN  |
|-----------------|------|------------------|-----------------|---------|---------|---------|---------|------|------|------|------|-----------|------------|-------|------------|------|------|------|---------|------|---------|---------|------|------|------|
|                 |      | Lot 7            |                 |         |         |         |         |      |      |      |      |           |            |       |            |      |      |      |         |      |         |         |      |      |      |
| Lab 1           | yes  | -                | -               | -       | -       | -       | -       | -    | 0.6  | 23.9 | -    | -         | -          | -     | -0.2       | -0.9 | -0.4 | -1.6 | -       | -0.8 | -       | -       | -    | -    | 0.2  |
| Lab 1           | yes  | -                | -               | -       | -       | -       | -       | -    | 0.5  | 24.7 | -    | -         | -          | -     | -0.2       | -0.8 | -0.2 | -1.4 | -       | -0.9 | -       | -       | -    | -    | 0.0  |
| Lab 2           | no   | -0.8             | -               | no stat | -       | -       | -       | -3.2 | -0.3 | -2.5 | -1.5 | no stat   | -0.9       | -1.4  | -0.2       | 1.2  | 1.3  | 0.7  | no stat | 0.9  | no stat | -2.2    | -    | -0.2 | -1.4 |
| Lab 2           | no   | -1.2             | -               | no stat | -       | -       | -       | -3.4 | -0.9 | -2.5 | -1.8 | no stat   | -1.2       | -1.7  | -0.6       | 1.3  | 1.3  | 1.0  | no stat | 0.7  | no stat | -2.3    | -    | -0.4 | -0.9 |
| Lab 3           | yes  | -                | -               | -       | -       | -       | -       | -    | -    | -    | -0.8 | -         | -          | -     | -          | -2.3 | -2.0 | -    | no stat | -    | -       | -2.3    | -    | -0.9 | 1.1  |
| Lab 3           | yes  | -                | -               | -       | -       | -       | -       | -    | -    | -    | -0.5 | -         | -          | -     | -          | -2.5 | -2.3 | -    | no stat | -    | -       | -2.3    | -    | -0.6 | 0.1  |
| Lab 4           | yes  | -                | -               | -       | -       | -       | -       | -    | -2.3 | -1.5 | 0.2  | -         | -          | -3.2  | -3.9       | -0.1 | -0.4 | -0.4 | -       | -0.1 | -       | 25.3    | -    | -    | -1.2 |
| Lab 4           | yes  | -                | -               | -       | -       | -       | -       | -    | -2.7 | -1.3 | 0.9  | -         | -          | -3.2  | -3.9       | 0.3  | -0.9 | 0.2  | -       | -0.1 | -       | 25.7    | -    | -    | -1.2 |
| Lab 5           | yes  | -                | -               | -       | -       | -       | -       | -    | -2.3 | 0.5  | -0.8 | -         | -          | 2.9   | 3.6        | 2.5  | 1.7  | -    | -       | -    | -       | -       | -    | 0.5  |      |
| Lab 5           | yes  | -                | -               | -       | -       | -       | -       | -    | -1.6 | 1.0  | 0.8  | -         | -          | -2.2  | -          | 0.1  | 1.9  | 1.1  | -       | -    | -       | -       | -    | 1.1  |      |
| Lab 6           | no   | -                | -               | -       | -       | -       | -       | -    | -0.9 | -    | -1.5 | no stat   | -0.1       | 2.7   | 0.6        | 8.9  | 13.2 | -    | -       | -    | -       | -       | -    | 0.9  |      |
| Lab 6           | no   | -                | -               | no stat | no stat | no stat | no stat | -    | -1.4 | -    | -    | no stat   | 1.3        | 2.4   | 1.1        | 9.7  | 4.3  | -    | -       | -    | -       | no stat | 14.6 | 1.1  |      |
| Lab 7           | yes  | -                | -               | no stat | -       | -       | -       | -    | -    | -    | 2.3  | -         | -          | -     | -          | 2.8  | 2.2  | -    | -       | -    | -       | -       | -    | 0.9  |      |
| Lab 7           | yes  | -                | -               | -       | -       | -       | -       | -    | -    | -    | 1.8  | -         | -          | -     | -          | 2.4  | 2.1  | -    | -       | -    | -       | -       | -    | 1.0  |      |
| Lab 8           | no   | 1.5              | -               | -       | -       | -       | -       | 7.6  | 2.9  | -    | -3.3 | -         | 14.5       | 3.4   | 5.7        | 0.9  | -0.8 | -    | -       | 0.3  | -       | 15.6    | -    | 3.9  | -1.2 |
| Lab 8           | no   | 1.7              | -               | -       | -       | -       | -       | 8.1  | 2.7  | -    | -3.3 | -         | 14.4       | 3.1   | 5.3        | 1.1  | -0.6 | -    | -       | -    | -       | 15.3    | -    | 3.8  | -1.3 |
| Lab 9           | no   | -0.9             | -               | -       | -       | -       | -       | 0.3  | 2.0  | -    | 2.2  | -         | -2.1       | -0.9  | -0.1       | -4.1 | -2.5 | -    | -       | -    | -0.9    | -       | -    | 1.3  |      |
| Lab 9           | no   | 0.9              | -               | -       | -       | -       | -       | 0.5  | 3.0  | -    | 1.1  | -         | -1.5       | -0.6  | 0.4        | -3.9 | -3.0 | -    | -       | -    | -0.6    | -       | -    | 0.9  |      |
| Lab 10          | no   | -1.3             | -               | -       | -       | -       | -       | -1.6 | 0.2  | -    | 2.8  | -         | -          | -0.7  | -0.8       | -3.9 | -2.0 | -    | -       | -    | -       | -       | -2.6 | -1.0 |      |
| Lab 10          | no   | 0.1              | -               | -       | -       | -       | -       | -0.9 | 0.6  | -    | 1.1  | -         | -          | -0.6  | -0.5       | -3.9 | -2.3 | -    | -       | -    | -       | -       | -1.6 | -0.9 |      |

| Lab Cod e | ISTD | 15-AcDO N | 3-AcDO N | AFB1    | AFB2 | AFG1 | AFG2 | AOH  | BEA  | D3G  | DON  | ENN-A   | ENN -A1 | ENN-B | ENN -B1 | FB1  | FB2  | FB3     | HT-2 | MON  | NIV | OTA  | OTB | T-2  | ZEN  |
|-----------|------|-----------|----------|---------|------|------|------|------|------|------|------|---------|---------|-------|---------|------|------|---------|------|------|-----|------|-----|------|------|
|           |      | Lot 8     |          |         |      |      |      |      |      |      |      |         |         |       |         |      |      |         |      |      |     |      |     |      |      |
| Lab 1     | yes  | -         | -        | -       | -    | -    | -    | -    | 0.1  | -    | 2.4  | -       | -2.0    | -     | -1.1    | -1.0 | -2.2 | -       | -    | -0.6 | -   | -1.6 | -   | -1.5 | -0.2 |
| Lab 1     | yes  | -         | -        | -       | -    | -    | -    | -    | 1.1  | -    | 2.5  | -       | -       | -     | -0.7    | -0.9 | -2.3 | -       | -    | -0.6 | -   | -1.5 | -   | -1.4 | -0.2 |
| Lab 2     | no   | 1.1       | -        | no stat | -    | -    | -    | -2.1 | -1.2 | -1.2 | -1.5 | no stat | -2.0    | 0.3   | 0.1     | 0.2  | 0.9  | no stat | 0.1  | 0.4  | -   | -2.2 | -   | -1.5 | -2.3 |
| Lab 2     | no   | 2.7       | -        | no stat | -    | -    | -    | -2.2 | -1.1 | -1.4 | -0.6 | no stat | -2.1    | -0.4  | -0.5    | 1.0  | 2.0  | no stat | 0.4  | 1.0  | -   | -2.3 | -   | -0.9 | -2.3 |
| Lab 3     | yes  | -         | -        | no stat | -    | -    | -    | -    | -    | -    | -0.9 | -       | -       | -     | -       | -2.5 | -3.4 | -       | -0.1 | -    | -   | -1.2 | -   | -0.4 | -0.1 |
| Lab 3     | yes  | -         | -        | no stat | -    | -    | -    | -    | -    | -    | -1.1 | -       | -       | -     | -       | -2.3 | -3.3 | -       | 0.1  | -    | -   | -3.2 | -   | -1.4 | -0.1 |
| Lab 4     | yes  | -         | -        | -       | -    | -    | -    | -    | 1.5  | -0.3 | 1.4  | -       | -       | -1.4  | -3.1    | -1.0 | -2.4 | -       | -    | 0.2  | -   | 16.1 | -   | 0.8  | 0.5  |
| Lab 4     | yes  | -         | -        | -       | -    | -    | -    | -    | -1.2 | -0.2 | 0.8  | -       | -       | -1.5  | -3.3    | -0.5 | -2.7 | -       | -    | 0.3  | -   | 14.9 | -   | 0.7  | 0.7  |
| Lab 5     | yes  | 11.5      | -        | -       | -    | -    | -    | -    | -3.6 | 1.3  | 2.9  | -       | -       | 0.8   | 0.1     | 2.9  | -1.1 | -       | -    | -    | -   | -1.8 | -   | -    | 0.7  |
| Lab 5     | yes  | -         | -        | -       | -    | -    | -    | -    | -2.8 | 1.8  | 0.6  | -       | -       | -0.3  | 0.2     | 0.6  | -0.5 | -       | -    | -    | -   | -    | -   | -    | 2.1  |
| Lab 6     | no   | -         | -        | -       | -    | -    | -    | -    | -0.6 | -    | -1.4 | no stat | -0.6    | 5.2   | 0.4     | 29.6 | 24.8 | -       | -    | -    | 1.8 | -    | 1.0 | 0.4  |      |
| Lab 6     | no   | -         | -        | -       | -    | -    | -    | -    | -1.4 | -    | 1.4  | no stat | 2.0     | 7.5   | 2.3     | 26.1 | 11.1 | -       | 22.7 | -    | -   | -    | -   | 6.2  | 1.1  |
| Lab 7     | yes  | -         | -        | -       | -    | -    | -    | -    | -    | -    | 3.1  | -       | -       | -     | -       | 0.3  | 4.0  | -       | -    | -    | -   | -    | -   | -    | 0.5  |
| Lab 7     | yes  | -         | -        | -       | -    | -    | -    | -    | -    | -    | 2.8  | -       | -       | -     | -       | 1.2  | 5.9  | -       | -    | -    | -   | -    | -   | -    | 0.5  |
| Lab 8     | no   | 0.0       | no stat  | no stat | -    | -    | -    | 25.1 | 2.2  | -    | -3.8 | -       | 17.4    | 3.3   | 4.1     | 2.3  | 0.4  | -       | -1.1 | -0.8 | -   | 5.2  | -   | 4.5  | -1.9 |
| Lab 8     | no   | 0.7       | no stat  | no stat | -    | -    | -    | 25.3 | 2.3  | -    | -3.7 | -       | 17.5    | 4.0   | 4.5     | 0.3  | -0.1 | -       | -1.6 | -    | -   | 4.9  | -   | 0.0  | -2.0 |
| Lab 9     | no   | -1.2      | -        | -       | -    | -    | -    | -1.0 | 2.1  | -    | -0.2 | -       | -1.3    | -1.5  | 1.1     | -0.4 | -0.7 | -       | -    | -    | -   | -    | -   | -    | 1.1  |
| Lab 9     | no   | -1.8      | -        | -       | -    | -    | -    | 1.4  | 1.5  | -    | -1.5 | -       | -0.6    | -1.7  | -0.1    | -0.7 | 0.8  | -       | -    | -    | -   | -    | -   | -    | 1.0  |
| Lab 10    | no   | -2.5      | -        | -       | -    | -    | -    | -1.9 | -0.2 | -    | -0.6 | -       | -       | -1.7  | -0.5    | -1.0 | -0.1 | -       | -    | -    | -   | -    | -   | -    | -1.1 |
| Lab 10    | no   | -2.5      | -        | -       | -    | -    | -    | 0.0  | 0.4  | -    | -1.9 | -       | -       | -1.8  | -0.9    | -1.5 | -0.7 | -       | -    | -    | -   | -    | -   | -    | -1.0 |

[illegible][illegible]

### 3.4. Overview of individual z-score data for swine feed matrix

**Table S9:** Summary of z-score performance of 10 swine feed matrices. Acceptable, questionable and unacceptable z-scores are colored in green, yellow and red respectively. No-stat information refers to positive findings where a z-score calculation was not feasible due to a reduced number of reported results.

| Lab Code | ISTD | Concentrations (µg/kg) - Where a 2 score calculation was not feasible due to a reduced number of reported results |         |         |      |      |      |      |      |     |      |       |        |       |        |      |      |         |         |      |     |      |         |      |      |  |
|----------|------|-------------------------------------------------------------------------------------------------------------------|---------|---------|------|------|------|------|------|-----|------|-------|--------|-------|--------|------|------|---------|---------|------|-----|------|---------|------|------|--|
|          |      | 15-AcDON                                                                                                          | 3-AcDON | AFB1    | AFB2 | AFG1 | AFG2 | AOH  | BEA  | D3G | DON  | ENN-A | ENN-A1 | ENN-B | ENN-B1 | FB1  | FB2  | FB3     | HT-2    | MON  | NIV | OTA  | OTB     | T-2  | ZEN  |  |
|          |      | Lot 1                                                                                                             |         |         |      |      |      |      |      |     |      |       |        |       |        |      |      |         |         |      |     |      |         |      |      |  |
| Lab 1    | yes  | -                                                                                                                 | -       | -       | -    | -    | -    | -    | -    | -   | -    | -     | -      | -     | -      | 1.0  | -0.7 | -       | -       | 0.8  | -   | 2.6  | -       | -    | -    |  |
| Lab 1    | yes  | -                                                                                                                 | -       | -       | -    | -    | -    | -    | -0.8 | -   | -    | -     | -      | -     | -      | 0.7  | -0.9 | -       | -       | 1.2  | -   | 2.8  | -       | -    | -    |  |
| Lab 2    | no   | -                                                                                                                 | -       | no stat | -    | -    | -    | -2.1 | 0.0  | -   | -0.4 | -0.2  | 0.2    | -0.3  | 0.3    | 0.4  | 1.6  | no stat | -       | -0.4 | -   | -0.3 | no stat | -1.8 | -3.0 |  |
| Lab 2    | no   | -                                                                                                                 | -       | no stat | -    | -    | -    | 1.5  | 2.2  | -   | -0.5 | -0.1  | 0.9    | 0.6   | 1.2    | -0.6 | 1.0  | no stat | -       | -0.5 | -   | -0.4 | no stat | 0.4  | -2.9 |  |
| Lab 3    | yes  | -                                                                                                                 | -       | no stat | -    | -    | -    | -    | -    | -   | 1.6  | -     | -      | -     | -      | -2.7 | -3.2 | -       | no stat | -    | -   | -1.4 | -       | 2.1  | 2.2  |  |
| Lab 3    | yes  | -                                                                                                                 | -       | no stat | -    | -    | -    | -    | -    | -   | -1.5 | -     | -      | -     | -      | -2.7 | -3.0 | -       | no stat | -    | -   | -1.2 | -       | -0.4 | 0.9  |  |
| Lab 4    | yes  | -                                                                                                                 | -       | -       | -    | -    | -    | -    | 4.2  | -   | -    | -     | -      | -1.8  | -3.2   | 0.9  | -1.3 | no stat | -       | -0.1 | -   | 6.5  | -       | 12.0 | 0.1  |  |
| Lab 4    | yes  | -                                                                                                                 | -       | -       | -    | -    | -    | -    | 1.8  | -   | -    | -     | -      | -2.3  | -3.3   | 0.4  | -0.9 | no stat | -       | -0.3 | -   | 5.9  | -       | 9.3  | 0.5  |  |
| Lab 5    | yes  | -                                                                                                                 | -       | -       | -    | -    | -    | -    | -3.9 | -   | -    | -     | -      | -2.0  | -      | -0.5 | -1.2 | -       | -       | -    | -   | 0.9  | -       | -    | -    |  |
| Lab 5    | yes  | -                                                                                                                 | -       | -       | -    | -    | -    | -    | -3.6 | -   | -    | -     | -      | -1.1  | -      | -0.2 | -0.5 | -       | -       | -    | -   | -0.1 | -       | -    | -    |  |
| Lab 6    | no   | -                                                                                                                 | -       | -       | -    | -    | -    | -    | 0.6  | -   | -    | 0.2   | 0.8    | 6.6   | 1.4    | 9.3  | 19.8 | -       | -       | -    | -   | 0.1  | -       | -    | -    |  |
| Lab 6    | no   | -                                                                                                                 | -       | -       | -    | -    | -    | -    | 0.6  | -   | -    | 1.5   | 2.2    | 4.7   | 1.2    | 9.3  | 29.3 | -       | -       | -    | -   | 0.1  | -       | -    | 10.0 |  |
| Lab 7    | yes  | -                                                                                                                 | -       | -       | -    | -    | -    | -    | -    | -   | 7.1  | -     | -      | -     | -      | 0.8  | 3.0  | -       | -       | -    | -   | 1.6  | -       | -    | -    |  |
| Lab 7    | yes  | -                                                                                                                 | -       | -       | -    | -    | -    | -    | -    | -   | 10.3 | -     | -      | -     | -      | 3.2  | 3.5  | -       | -       | -    | -   | 0.5  | -       | -    | -    |  |
| Lab 8    | no   | no stat                                                                                                           | no stat | -       | -    | -    | -    | -    | -0.9 | -   | -3.9 | -     | -      | -     | -      | -1.3 | -2.1 | -       | no stat | -1.8 | -   | -1.3 | no stat | -    | -    |  |
| Lab 8    | no   | no stat                                                                                                           | no stat | -       | -    | -    | -    | -    | -0.8 | -   | -4.3 | -     | -4.5   | -     | -      | -0.3 | -1.7 | -       | no stat | 0.9  | -   | -1.3 | no stat | -2.6 | -    |  |
| Lab 9    | no   | -                                                                                                                 | -       | -       | -    | -    | -    | 1.7  | -2.4 | -   | -    | -1.2  | -1.8   | -1.2  | -0.9   | -0.7 | -    | -       | -       | -    | -   | -2.0 | -       | -    | 0.3  |  |
| Lab 9    | no   | -                                                                                                                 | -       | -       | -    | -    | -    | 1.1  | 0.8  | -   | -    | 0.1   | -0.7   | -0.1  | -0.8   | -1.0 | -    | -       | -       | -    | -   | -1.4 | -       | -    | 0.0  |  |
| Lab 10   | no   | -                                                                                                                 | -       | -       | -    | -    | -    | -0.4 | 0.1  | -   | -    | -     | -      | 1.3   | 0.8    | -0.5 | -    | -       | -       | -    | -   | -1.4 | -       | -0.7 | -1.3 |  |
| Lab 10   | no   | -                                                                                                                 | -       | -       | -    | -    | -    | -1.8 | 0.1  | -   | -    | -     | -      | 1.2   | 0.3    | -0.2 | -    | -       | -       | -    | -   | -1.4 | -       | -1.7 | -0.9 |  |

| Lab<br>Cod<br>e | ISTD | 15-<br>AcDO<br>N | 3-<br>AcDO<br>N | AFB1 | AFB2 | AFG1 | AFG2 | AOH  | BEA  | D3G     | DON  | ENN-<br>A | ENN<br>-A1 | ENN-B | ENN<br>-B1 | FB1  | FB2  | FB3 | HT-2 | MON  | NIV  | OTA     | OTB | T-2  | ZEN  |
|-----------------|------|------------------|-----------------|------|------|------|------|------|------|---------|------|-----------|------------|-------|------------|------|------|-----|------|------|------|---------|-----|------|------|
|                 |      | Lot<br>2         |                 |      |      |      |      |      |      |         |      |           |            |       |            |      |      |     |      |      |      |         |     |      |      |
|                 |      |                  |                 |      |      |      |      |      |      |         |      |           |            |       |            |      |      |     |      |      |      |         |     |      |      |
| Lab 1           | yes  | -                | -               | -    | -    | -    | -    | -    | -1.5 | no stat | -    | -         | -1.1       | -2.9  | -1.5       | 0.0  | -    | -   | -    | 3.1  | -    | -       | -   | -    | -0.5 |
| Lab 1           | yes  | -                | -               | -    | -    | -    | -    | -    | -1.9 | -       | -    | -         | -1.2       | -2.8  | -1.5       | -0.3 | -    | -   | -    | 3.3  | -    | -       | -   | -    | -0.6 |
| Lab 2           | no   | no stat          | -               | -    | -    | -    | -    | -2.4 | -0.3 | no stat | -2.0 | -0.4      | 1.0        | -0.7  | 0.6        | 2.0  | -0.1 | -   | 1.1  | -0.3 | 2.4  | -       | -   | 0.5  | -1.8 |
| Lab 2           | no   | no stat          | -               | -    | -    | -    | -    | -2.2 | 1.0  | no stat | -2.1 | 0.6       | 1.8        | -0.8  | 0.9        | 1.8  | 0.5  | -   | 1.1  | -1.0 | 2.1  | -       | -   | 1.0  | -1.2 |
| Lab 3           | yes  | -                | -               | -    | -    | -    | -    | -    | -    | -       | -1.6 | -         | -          | -     | -          | -2.4 | -3.4 | -   | -0.2 | -    | -    | no stat | -   | -1.4 | -1.0 |
| Lab 3           | yes  | -                | -               | -    | -    | -    | -    | -    | -    | -       | -1.2 | -         | -          | -     | -          | -2.6 | -3.6 | -   | 0.0  | -    | -    | no stat | -   | -2.2 | -1.3 |
| Lab 4           | yes  | -                | -               | -    | -    | -    | -    | -2.0 | -0.1 | no stat | 0.2  | -2.1      | -3.0       | -0.7  | -2.3       | -    | -    | -   | -    | 0.0  | -0.1 | -       | -   | 0.7  | 1.2  |
| Lab 4           | yes  | -                | -               | -    | -    | -    | -    | -1.7 | 0.2  | no stat | 0.6  | -2.1      | -2.9       | -0.7  | -2.2       | -    | -    | -   | -    | 0.0  | 0.4  | -       | -   | 2.6  | 2.0  |
| Lab 5           | yes  | -                | -               | -    | -    | -    | -    | 3.8  | -3.2 | -       | -0.2 | -         | 1.5        | 1.3   | 2.9        | -    | -    | -   | -    | -    | 1.2  | -       | -   | -    | -    |
| Lab 5           | yes  | -                | -               | -    | -    | -    | -    | 4.6  | -2.1 | -       | 0.1  | -         | -1.0       | -0.1  | -0.1       | -    | -    | -   | -    | -    | 1.0  | -       | -   | -    | -    |
| Lab 6           | no   | -                | -               | -    | -    | -    | -    | -    | -0.3 | -       | 0.1  | 0.1       | 2.0        | 3.9   | 1.3        | -    | 51.4 | -   | -    | -    | -    | -       | -   | -0.3 | 1.2  |
| Lab 6           | no   | -                | -               | -    | -    | -    | -    | -    | -0.2 | -       | -0.2 | 0.6       | 2.3        | 1.8   | 0.5        | -    | 44.6 | -   | -    | -    | -    | -       | -   | -    | 2.3  |
| Lab 7           | yes  | -                | -               | -    | -    | -    | -    | -    | -    | -       | 0.8  | -         | -          | -     | -          | -    | -    | -   | -    | -    | -    | -       | -   | -    | -    |
| Lab 7           | yes  | -                | -               | -    | -    | -    | -    | -    | -    | -       | 1.3  | -         | -          | -     | -          | -    | -    | -   | -    | -    | -    | -       | -   | -    | -    |
| Lab 8           | no   | no stat          | no stat         | -    | -    | -    | -    | -1.9 | 0.3  | -       | -3.9 | -         | -1.3       | -0.3  | -0.4       | 0.2  | -0.7 | -   | -1.8 | -2.4 | -1.8 | -       | -   | -2.5 | -3.5 |
| Lab 8           | no   | no stat          | no stat         | -    | -    | -    | -    | -0.4 | 1.1  | -       | -3.9 | -         | -0.9       | 0.3   | 0.2        | 1.4  | -0.3 | -   | 3.4  | -2.3 | -2.4 | -       | -   | 9.2  | -3.1 |
| Lab 9           | no   | -                | -               | -    | -    | -    | -    | 0.7  | 0.3  | -       | 3.2  | 0.1       | 0.9        | -0.1  | -0.2       | -    | -    | -   | -    | -    | -    | -       | -   | 1.8  | 0.8  |
| Lab 9           | no   | -                | -               | -    | -    | -    | -    | 0.4  | 0.4  | -       | 3.0  | 0.2       | 0.9        | -0.1  | -0.1       | -    | -    | -   | -    | -    | -    | -       | -   | 0.9  | 1.4  |
| Lab 10          | no   | -                | -               | -    | -    | -    | -    | 1.1  | 0.4  | -       | 2.0  | 0.1       | -0.1       | 1.2   | 1.0        | -    | -    | -   | -1.0 | -    | -1.2 | -       | -   | -0.5 | 1.1  |
| Lab 10          | no   | -                | -               | -    | -    | -    | -    | 0.9  | 1.6  | -       | 2.2  | 0.6       | 0.4        | 1.2   | 0.8        | -    | -    | -   | -1.7 | -    | -1.6 | -       | -   | -0.3 | 1.3  |



| Lab<br>Cod<br>e | ISTD | 15-<br>AcDO<br>N | 3-<br>AcDO<br>N | AFB1 | AFB2 | AFG1 | AFG2 | AOH  | BEA  | D3G     | DON  | ENN-A | ENN<br>-A1 | ENN-B | ENN<br>-B1 | FB1  | FB2  | FB3 | HT-2 | MON  | NIV  | OTA | OTB | T-2  | ZEN  |
|-----------------|------|------------------|-----------------|------|------|------|------|------|------|---------|------|-------|------------|-------|------------|------|------|-----|------|------|------|-----|-----|------|------|
|                 |      | Lot 3            |                 |      |      |      |      |      |      |         |      |       |            |       |            |      |      |     |      |      |      |     |     |      |      |
| Lab 1           | yes  | -                | -               | -    | -    | -    | -    | 0.4  | -0.8 | -       | -    | -     | -1.7       | -2.8  | -1.6       | 0.4  | -    | -   | -    | 3.5  | -    | -   | -   | -0.9 | -0.3 |
| Lab 1           | yes  | -                | -               | -    | -    | -    | -    | 0.3  | 1.0  | -       | -    | -     | 0.1        | -2.6  | -1.2       | 1.2  | -    | -   | -    | 3.3  | -    | -   | -   | -0.5 | -0.4 |
| Lab 2           | no   | -0.7             | -               | -    | -    | -    | -    | -2.2 | 0.0  | no stat | -1.7 | 1.6   | 2.9        | 0.1   | 2.1        | -0.1 | -0.1 | -   | 1.7  | -0.4 | 1.1  | -   | -   | 0.8  | -1.7 |
| Lab 2           | no   | -0.8             | -               | -    | -    | -    | -    | -2.1 | 2.6  | no stat | -1.5 | 0.4   | 1.4        | 0.2   | 1.2        | -0.8 | -1.1 | -   | 1.6  | -0.3 | 2.8  | -   | -   | 1.7  | -1.6 |
| Lab 3           | yes  | -                | -               | -    | -    | -    | -    | -    | -    | -       | -1.0 | -     | -          | -     | -          | -3.0 | -3.2 | -   | 1.2  | -    | -    | -   | -   | -1.4 | -1.1 |
| Lab 3           | yes  | -                | -               | -    | -    | -    | -    | -    | -    | -       | -1.3 | -     | -          | -     | -          | -3.0 | -3.1 | -   | -0.6 | -    | -    | -   | -   | -1.6 | 0.7  |
| Lab 4           | yes  | -                | -               | -    | -    | -    | -    | -1.3 | -0.6 | no stat | 0.5  | -2.8  | -3.5       | -1.4  | -2.9       | -    | -    | -   | -    | 0.3  | 0.7  | -   | -   | 1.4  | 1.7  |
| Lab 4           | yes  | -                | -               | -    | -    | -    | -    | -1.3 | -1.8 | no stat | 0.6  | -3.2  | -3.7       | -1.6  | -3.0       | -    | -    | -   | -    | 0.1  | 0.5  | -   | -   | 3.2  | 1.8  |
| Lab 5           | yes  | -                | -               | -    | -    | -    | -    | 3.0  | -3.3 | -       | 0.2  | 0.0   | 1.2        | 0.5   | 2.0        | 0.0  | -    | -   | -    | -    | 0.6  | -   | -   | -    | -    |
| Lab 5           | yes  | -                | -               | -    | -    | -    | -    | 2.7  | -2.4 | -       | -0.2 | -     | -1.7       | -0.4  | -0.6       | -    | -    | -   | -    | 1.2  | -    | -   | -   | -    | -    |
| Lab 6           | no   | -                | -               | -    | -    | -    | -    | -    | 2.1  | -       | -    | 0.8   | 2.8        | 4.8   | 2.4        | 12.2 | 34.9 | -   | -    | -    | -    | -   | 1.4 | 1.5  |      |
| Lab 6           | no   | -                | -               | -    | -    | -    | -    | -    | 0.4  | -       | 0.5  | 1.2   | 2.6        | 4.2   | 1.3        | -    | 40.0 | -   | -    | -    | -    | -   | -   | 1.0  |      |
| Lab 7           | yes  | -                | -               | -    | -    | -    | -    | -    | -    | -       | 0.6  | -     | -          | -     | -          | -    | -    | -   | -    | -    | -    | -   | -   | -    |      |
| Lab 7           | yes  | -                | -               | -    | -    | -    | -    | -    | -    | -       | 0.9  | -     | -          | -     | -          | -    | -    | -   | -    | -    | -    | -   | -   | -    |      |
| Lab 8           | no   | -3.0             | no stat         | -    | -    | -    | -    | -1.7 | 0.1  | -       | -3.5 | -     | -1.3       | 0.4   | -0.1       | 1.6  | 0.8  | -   | -2.0 | -1.9 | -1.7 | -   | -   | -2.5 | -3.1 |
| Lab 8           | no   | -2.8             | no stat         | -    | -    | -    | -    | -2.8 | 0.9  | -       | -3.6 | -     | -1.1       | 0.4   | 0.1        | -0.1 | -0.7 | -   | -1.9 | -1.7 | -2.6 | -   | -   | -2.1 | -3.2 |
| Lab 9           | no   | -                | -               | -    | -    | -    | -    | 1.9  | -0.4 | -       | 1.0  | -0.7  | 0.0        | -0.3  | -0.8       | -    | -    | -   | -    | -    | -    | -   | 1.5 | 0.9  |      |
| Lab 9           | no   | -                | -               | -    | -    | -    | -    | 0.9  | -0.8 | -       | 0.5  | -0.6  | -0.1       | -0.5  | -0.8       | -    | -    | -   | -    | -    | -    | -   | 1.2 | 1.1  |      |
| Lab 10          | no   | 5.0              | -               | -    | -    | -    | -    | 0.8  | 1.0  | -       | 0.6  | 0.3   | 0.1        | 1.0   | 0.5        | -    | -    | -   | -    | -    | -1.4 | -   | -   | -1.2 | 0.2  |
| Lab 10          | no   | 4.9              | -               | -    | -    | -    | -    | 1.2  | 0.8  | -       | 0.9  | 0.3   | 0.5        | 1.0   | 0.8        | -    | -    | -   | -    | -    | -1.5 | -   | -   | -0.6 | 0.2  |

[illegible]

| Lab<br>Cod<br>e | ISTD | 15-<br>AcDO<br>N | 3-<br>AcDO<br>N | AFB1    | AFB2 | AFG1 | AFG2    | AOH  | BEA  | D3G  | DON  | ENN-A | ENN<br>-A1 | ENN-B | ENN<br>-B1 | FB1  | FB2  | FB3 | HT-2 | MON  | NIV     | OTA     | OTB | T-2     | ZEN  |
|-----------------|------|------------------|-----------------|---------|------|------|---------|------|------|------|------|-------|------------|-------|------------|------|------|-----|------|------|---------|---------|-----|---------|------|
|                 |      | Lot 5            |                 |         |      |      |         |      |      |      |      |       |            |       |            |      |      |     |      |      |         |         |     |         |      |
| Lab 1           | yes  | -                | -               | -       | -    | -    | -       | -    | -    | -    | 2.1  | -     | -1.9       | -2.8  | -1.8       | 1.5  | -    | -   | -    | 2.0  | -       | -       | -   | -       | -0.5 |
| Lab 1           | yes  | -                | -               | -       | -    | -    | -       | -    | -0.9 | -    | 2.7  | -     | -1.3       | -2.8  | -1.8       | 2.2  | 0.9  | -   | -    | 2.7  | -       | -       | -   | -       | -0.1 |
| Lab 2           | no   | -1.1             | 0.1             | no stat | -    | -    | -       | -2.8 | 0.3  | -0.5 | -2.7 | 0.1   | 1.2        | 0.3   | 1.0        | -0.8 | 0.6  | -   | 6.5  | -0.4 | no stat | -       | -   | no stat | -1.0 |
| Lab 2           | no   | -1.0             | -0.8            | no stat | -    | -    | -       | -1.8 | 0.0  | -0.5 | -3.0 | 0.4   | 1.7        | -0.2  | 1.0        | 1.7  | 0.9  | -   | 4.5  | -0.6 | no stat | -       | -   | no stat | -1.5 |
| Lab 3           | yes  | -                | -               | -       | -    | -    | -       | -    | -    | -    | -2.1 | -     | -          | -     | -          | -2.2 | -2.0 | -   | 0.1  | -    | -       | no stat | -   | no stat | -0.2 |
| Lab 3           | yes  | -                | -               | -       | -    | -    | -       | -    | -    | -    | -2.1 | -     | -          | -     | -          | -2.1 | -2.0 | -   | -0.3 | -    | -       | no stat | -   | no stat | -1.0 |
| Lab 4           | yes  | 4.6              | -               | -       | -    | -    | -       | -0.3 | -2.5 | 1.0  | 0.0  | -3.7  | -4.0       | -2.6  | -3.7       | 0.5  | -1.1 | -   | -    | 0.3  | -       | -       | -   | -       | -0.5 |
| Lab 4           | yes  | 5.0              | -               | -       | -    | -    | -       | 0.5  | -2.3 | 0.5  | 0.9  | -3.5  | -3.9       | -2.4  | -3.6       | -0.6 | -1.1 | -   | -    | 0.4  | -       | -       | -   | -       | -0.8 |
| Lab 5           | yes  | 5.0              | -               | -       | -    | -    | -       | -    | -1.7 | 1.0  | 0.0  | 0.8   | 2.4        | 1.3   | 3.0        | 1.5  | -    | -   | -    | -    | -       | -       | -   | -       | 4.4  |
| Lab 5           | yes  | 4.5              | -               | -       | -    | -    | -       | 4.4  | -1.7 | 0.8  | 0.1  | 0.8   | 1.7        | 1.4   | 1.8        | 1.1  | -    | -   | -    | -    | -       | -       | -   | -       | 1.7  |
| Lab 6           | no   | -                | -               | -       | -    | -    | -       | -    | 3.3  | -    | -1.5 | 0.2   | 2.0        | 6.1   | 2.5        | 13.3 | 26.9 | -   | -    | -    | -       | -       | -   | -       | 2.8  |
| Lab 6           | no   | -                | -               | -       | -    | -    | -       | -    | 3.9  | -    | -1.0 | 0.7   | 2.1        | 3.5   | 0.9        | 11.5 | 29.3 | -   | -    | -    | -       | -       | -   | -       | 1.7  |
| Lab 7           | yes  | -                | -               | -       | -    | -    | -       | -    | -    | -    | 0.6  | -     | -          | -     | -          | -0.8 | -    | -   | -    | -    | -       | -       | -   | -       | 1.0  |
| Lab 7           | yes  | -                | -               | -       | -    | -    | -       | -    | -    | -    | 1.0  | -     | -          | -     | -          | -0.5 | -    | -   | -    | -    | -       | -       | -   | -       | 0.8  |
| Lab 8           | no   | -2.6             | -2.9            | -       | -    | -    | no stat | -3.9 | 1.3  | -    | -4.2 | -     | -1.4       | 0.1   | -0.5       | -0.8 | -0.4 | -   | -0.3 | -2.1 | -       | no stat | -   | no stat | -3.0 |
| Lab 8           | no   | -2.5             | -3.0            | -       | -    | -    | no stat | -4.2 | 1.0  | -    | -4.2 | -     | -1.3       | 0.1   | -0.5       | -0.8 | -0.5 | -   | -0.5 | -2.1 | -       | no stat | -   | -       | -3.0 |
| Lab 9           | no   | 0.2              | 1.2             | -       | -    | -    | -       | 1.6  | 0.0  | -0.1 | 3.5  | -0.5  | 0.3        | -0.2  | -0.7       | -1.3 | -    | -   | -    | -    | -       | -       | -   | -       | 0.6  |
| Lab 9           | no   | -1.0             | 2.3             | -       | -    | -    | -       | 2.6  | -0.5 | -0.6 | 2.9  | -0.6  | 0.2        | -0.5  | -1.0       | -1.6 | -    | -   | -    | -    | -       | -       | -   | -       | 0.7  |
| Lab 10          | no   | -0.6             | 0.8             | -       | -    | -    | -       | 1.6  | 1.2  | -0.7 | 3.1  | 0.2   | 0.3        | 1.0   | 0.7        | -0.7 | -    | -   | -    | -    | -       | -       | -   | -       | -0.1 |
| Lab 10          | no   | -0.6             | 0.2             | -       | -    | -    | -       | 2.1  | 0.7  | -0.3 | 4.0  | 0.1   | 0.1        | 0.9   | 0.7        | -0.9 | -    | -   | -    | -    | -       | -       | -   | -       | -0.2 |

| Lab Cod e | ISTD | 15-AcDO N | 3-AcDO N | AFB1 | AFB2 | AFG1 | AFG2    | AOH   | BEA  | D3G  | DON  | ENN-A | ENN -A1 | ENN-B | ENN -B1 | FB1  | FB2  | FB3     | HT-2 | MON  | NIV  | OTA     | OTB     | T-2  | ZEN  |
|-----------|------|-----------|----------|------|------|------|---------|-------|------|------|------|-------|---------|-------|---------|------|------|---------|------|------|------|---------|---------|------|------|
|           |      | Lot 6     |          |      |      |      |         |       |      |      |      |       |         |       |         |      |      |         |      |      |      |         |         |      |      |
| Lab 1     | yes  | -         | -        | -    | -    | -    | -       | -     | -1.4 | -    | 2.7  | -     | -1.8    | -2.3  | -0.9    | 0.8  | -0.6 | -       | -    | 3.5  | -    | 3.4     | -       | -    | -0.2 |
| Lab 1     | yes  | -         | -        | -    | -    | -    | -       | -     | -1.2 | -    | 3.4  | -     | -1.9    | -2.3  | -0.7    | 1.0  | -0.4 | -       | -    | 3.7  | -    | 3.7     | -       | -    | 0.1  |
| Lab 2     | no   | 0.0       | -0.5     | -    | -    | -    | -       | -1.4  | 0.8  | 1.0  | -1.8 | 0.7   | 0.8     | -0.5  | 0.9     | -0.4 | 1.2  | no stat | -    | -1.1 | -0.1 | -1.5    | -       | -1.1 | -0.8 |
| Lab 2     | no   | -0.9      | -1.4     | -    | -    | -    | -       | -2.6  | 0.6  | 1.3  | -2.3 | 0.2   | 1.0     | 0.1   | 1.5     | -0.8 | 0.6  | no stat | -    | -1.0 | 1.9  | -1.7    | -       | 4.5  | -2.0 |
| Lab 3     | yes  | -         | -        | -    | -    | -    | -       | -     | -    | -    | -1.3 | -     | -       | -     | -       | -2.7 | -2.8 | -       | 0.6  | -    | -    | -1.0    | -       | -2.3 | 1.0  |
| Lab 3     | yes  | -         | -        | -    | -    | -    | -       | -     | -    | -    | -1.2 | -     | -       | -     | -       | -3.3 | -3.1 | -       | 0.7  | -    | -    | -1.5    | -       | -0.8 | 2.5  |
| Lab 4     | yes  | 5.5       | 23.3     | -    | -    | -    | -       | -     | -1.7 | -0.1 | 0.7  | -3.3  | -4.1    | -2.9  | -3.8    | 1.0  | -1.6 | no stat | -    | 0.7  | 0.5  | 17.3    | -       | 1.4  | 0.1  |
| Lab 4     | yes  | 5.6       | 19.3     | -    | -    | -    | -       | -     | -1.0 | -0.2 | 0.4  | -3.0  | -4.0    | -2.7  | -3.6    | 0.8  | -1.1 | no stat | -    | 0.7  | 0.3  | 19.4    | -       | 1.6  | 0.5  |
| Lab 5     | yes  | 8.1       | -        | -    | -    | -    | -       | 321.6 | -4.2 | 17.7 | -3.0 | -     | -       | -1.6  | -2.6    | 0.8  | 0.2  | -       | -    | -    | -    | 0.4     | -       | -    | 0.4  |
| Lab 5     | yes  | 4.2       | -        | -    | -    | -    | -       | -     | -3.6 | 0.0  | 0.3  | -     | -       | -2.5  | -3.4    | -0.4 | 0.2  | -       | -    | -    | -    | -1.3    | -       | -    | 1.3  |
| Lab 6     | no   | -         | -        | -    | -    | -    | -       | -     | 1.7  | -    | -1.2 | 0.9   | 1.1     | 5.8   | 3.3     | 10.4 | 8.6  | -       | -    | -    | 0.5  | -       | -       | -    | 1.5  |
| Lab 6     | no   | -         | -        | -    | -    | -    | -       | -     | 1.0  | -    | -0.9 | 2.1   | 3.3     | 6.7   | 3.6     | 8.9  | 12.1 | -       | -    | -    | -0.5 | no stat | -       | -    | -0.5 |
| Lab 7     | yes  | -         | -        | -    | -    | -    | -       | -     | -    | -    | 1.4  | -     | -       | -     | -       | 4.3  | 6.7  | -       | -    | -    | 4.4  | -       | -       | -    | 1.2  |
| Lab 7     | yes  | -         | -        | -    | -    | -    | -       | -     | -    | -    | 2.9  | -     | -       | -     | -       | 2.8  | 1.8  | -       | -    | -    | -1.4 | -       | -       | 0.1  |      |
| Lab 8     | no   | -3.2      | -3.4     | -    | -    | -    | no stat | -4.3  | 2.0  | -    | -4.6 | -     | -0.6    | 4.1   | 2.1     | -0.5 | -1.2 | -       | 0.3  | -1.9 | -2.2 | -0.8    | no stat | -2.9 | -3.3 |
| Lab 8     | no   | -2.5      | -3.3     | -    | -    | -    | no stat | -1.4  | 2.4  | -    | -4.3 | -     | -1.0    | 0.9   | 0.3     | -0.9 | -1.3 | -       | 0.1  | -2.5 | -1.0 | 7.6     | no stat | -3.4 | -3.5 |
| Lab 9     | no   | -0.7      | 2.2      | -    | -    | -    | -       | 0.3   | -0.1 | -0.2 | 1.6  | -0.1  | 0.4     | -0.1  | -0.2    | -1.1 | -    | -       | -    | -    | -2.7 | -       | 1.3     | -0.2 |      |
| Lab 9     | no   | -0.3      | 0.8      | -    | -    | -    | -       | 0.7   | -0.3 | 0.1  | 1.8  | -0.2  | 0.3     | 0.1   | -0.4    | -1.7 | -    | -       | -    | -    | -3.1 | -       | 1.8     | -0.1 |      |
| Lab 10    | no   | -0.9      | -0.9     | -    | -    | -    | -       | 1.8   | 1.4  | -0.8 | 1.6  | 0.1   | 0.7     | 0.9   | 1.5     | -1.0 | -    | -       | -2.9 | -    | -    | -2.6    | -       | 0.6  | -0.7 |
| Lab 10    | no   | -0.6      | -0.9     | -    | -    | -    | -       | 1.9   | 1.8  | -0.2 | 1.0  | -0.4  | 1.2     | 0.9   | 1.7     | -0.8 | -    | -       | -1.5 | -    | -    | -2.9    | -       | -0.2 | -0.7 |

| Lab<br>Cod<br>e | ISTD | 15-<br>AcDO<br>N | 3-<br>AcDO<br>N | AFB1 | AFB2    | AFG1 | AFG2 | AOH  | BEA  | D3G     | DON  | ENN-A | ENN<br>-A1 | ENN-B | ENN<br>-B1 | FB1  | FB2  | FB3  | HT-2    | MON  | NIV  | OTA  | OTB | T-2     | ZEN  |
|-----------------|------|------------------|-----------------|------|---------|------|------|------|------|---------|------|-------|------------|-------|------------|------|------|------|---------|------|------|------|-----|---------|------|
|                 |      | Lot 7            |                 |      |         |      |      |      |      |         |      |       |            |       |            |      |      |      |         |      |      |      |     |         |      |
| Lab 1           | yes  | -                | -               | -    | -       | -    | -    | -    | -1.9 | -       | -    | -     | -1.8       | -2.6  | -1.1       | 0.9  | -0.1 | -0.3 | -       | 1.7  | -    | 1.7  | -   | -       | -0.3 |
| Lab 1           | yes  | -                | -               | -    | -       | -    | -    | -    | -1.7 | -       | -    | -     | -1.7       | -2.5  | -1.0       | 1.0  | 0.5  | -0.5 | -       | 1.7  | -    | 1.4  | -   | -       | -0.4 |
| Lab 2           | no   | 0.3              | -               | 1.1  | no stat | 0.7  | -    | -2.0 | 1.2  | no stat | -1.7 | 0.0   | 1.0        | 0.2   | 1.7        | -0.5 | 0.5  | 0.3  | -       | -1.4 | 2.1  | -0.2 | -   | no stat | -1.4 |
| Lab 2           | no   | 0.5              | -               | 2.7  | no stat | 0.4  | -    | -2.1 | 1.3  | no stat | -1.5 | -0.2  | 0.9        | 0.2   | 1.5        | -0.5 | 0.2  | 1.0  | -       | -1.4 | 0.4  | 2.9  | -   | no stat | 0.1  |
| Lab 3           | yes  | -                | -               | -1.6 | -       | -    | -    | -    | -    | -       | -1.3 | -     | -          | -     | -          | -2.9 | -2.2 | -    | no stat | -    | -    | -1.9 | -   | no stat | 0.3  |
| Lab 3           | yes  | -                | -               | -0.5 | -       | -    | -    | -    | -    | -       | -1.3 | -     | -          | -     | -          | -3.2 | -2.5 | -    | no stat | -    | -    | -2.0 | -   | no stat | -0.7 |
| Lab 4           | yes  | -                | -               | -0.9 | -       | -    | -    | 1.4  | -2.3 | no stat | 0.5  | -     | -          | -3.1  | -3.9       | -1.5 | -1.3 | -0.8 | -       | 0.8  | 0.2  | -    | -   | -       | 0.1  |
| Lab 4           | yes  | -                | -               | 0.8  | -       | -    | -    | 0.4  | -2.7 | no stat | 0.9  | -     | -          | -3.2  | -4.0       | -1.4 | -1.3 | -0.9 | -       | 0.8  | 1.1  | -    | -   | -       | 0.1  |
| Lab 5           | yes  | -                | -               | 1.7  | -       | -    | -    | 6.0  | -3.7 | no stat | -0.2 | -     | -          | -1.6  | -1.6       | 2.2  | 0.9  | 1.0  | -       | -    | -    | 0.0  | -   | -       | -    |
| Lab 5           | yes  | -                | -               | -0.7 | -       | -    | -    | 10.7 | -3.2 | -       | 0.1  | -     | -          | -1.9  | -2.3       | -0.3 | 0.6  | 0.0  | -       | -    | -    | -    | -   | -       | -    |
| Lab 6           | no   | -                | -               | 0.4  | -       | 0.9  | -    | -    | 1.9  | -       | 1.3  | 0.3   | 1.0        | 7.3   | 3.4        | 6.7  | 2.4  | -    | -       | -    | -    | 4.6  | -   | -       | 2.7  |
| Lab 6           | no   | -                | -               | -    | -       | 16.2 | -    | -    | 1.5  | 0.6     | 1.5  | 0.6   | 1.5        | 5.8   | 2.4        | 9.0  | 9.0  | -    | -       | -    | -    | 6.3  | -   | -       | 9.0  |
| Lab 7           | yes  | -                | -               | 0.6  | -       | 0.3  | -    | -    | -    | -       | 0.8  | -     | -          | -     | -          | 5.6  | 6.3  | -    | -       | -    | -    | -    | -   | -       | -    |
| Lab 7           | yes  | -                | -               | 1.1  | -       | 1.1  | -    | -    | -    | -       | 1.3  | -     | -          | -     | -          | 4.1  | 3.8  | -    | -       | -    | -    | -    | -   | -       | -    |
| Lab 8           | no   | -2.5             | -2.9            | -    | -       | -    | -    | -1.9 | 0.6  | -       | -3.5 | -     | -2.6       | 0.0   | -1.4       | -0.4 | -1.8 | -    | no stat | -2.4 | -1.7 | -1.4 | -   | no stat | -1.6 |
| Lab 8           | no   | -2.1             | -3.1            | -    | -       | -    | -    | -2.5 | 3.7  | -       | -3.5 | -     | -2.5       | 0.2   | -1.2       | -0.4 | -1.9 | -    | no stat | 0.0  | -2.1 | -1.3 | -   | -       | -3.2 |
| Lab 9           | no   | -                | 1.3             | -0.7 | -       | -1.1 | -    | -1.0 | 0.8  | -       | 0.4  | 0.1   | 0.9        | 1.3   | 1.3        | -0.6 | 0.3  | 0.6  | -       | -    | -    | -3.5 | -   | -       | 1.1  |
| Lab 9           | no   | -                | 1.3             | -0.8 | -       | -1.3 | -    | -0.9 | 0.6  | -       | 1.3  | 0.4   | 0.8        | 1.2   | 1.2        | -0.8 | -1.0 | 0.9  | -       | -    | -    | -3.2 | -   | -       | 0.8  |
| Lab 10          | no   | 1.5              | 0.5             | -1.2 | -       | -1.8 | -    | 1.1  | 1.0  | -       | 0.6  | -2.0  | -0.8       | 2.0   | 2.0        | -0.3 | -0.5 | -0.9 | -       | -    | -    | -    | -   | -       | -0.1 |
| Lab 10          | no   | 1.7              | 0.2             | -1.2 | -       | -1.8 | -    | 1.1  | 1.9  | -       | 1.2  | -0.7  | 0.4        | 1.7   | 2.1        | -0.1 | -0.6 | -0.6 | -       | -    | -    | -    | -   | -       | 0.1  |

[illegible]

| Lab Cod e | ISTD | 15-AcDO N | 3-AcDO N | AFB1 | AFB2 | AFG1 | AFG2 | AOH | BEA  | D3G  | DON  | ENN-A   | ENN -A1 | ENN-B | ENN -B1 | FB1     | FB2     | FB3 | HT-2    | MON  | NIV | OTA     | OTB     | T-2 | ZEN  |
|-----------|------|-----------|----------|------|------|------|------|-----|------|------|------|---------|---------|-------|---------|---------|---------|-----|---------|------|-----|---------|---------|-----|------|
| Lot 9     |      |           |          |      |      |      |      |     |      |      |      |         |         |       |         |         |         |     |         |      |     |         |         |     |      |
| Lab 1     | yes  | -         | -        | -    | -    | -    | -    | -   | -    | -    | -    | -       | -       | -     | -       | -       | -       | -   | -       | 2.3  | -   | -       | -       | -   | -    |
| Lab 1     | yes  | -         | -        | -    | -    | -    | -    | -   | -    | -    | -    | -       | -       | -     | -       | -       | -       | -   | -       | 2.5  | -   | -       | -       | -   | -    |
| Lab 2     | no   | 4.4       | -        | -    | -    | -    | -    | -   | 3.5  | 0.5  | -1.4 | no stat | -0.3    | 0.3   | 0.6     | -       | -       | -   | -       | -0.6 | -   | -       | -       | -   | -2.7 |
| Lab 2     | no   | 1.5       | -        | -    | -    | -    | -    | -   | -0.3 | 0.9  | -1.6 | no stat | 0.3     | 0.3   | 1.3     | -       | -       | -   | -       | -0.9 | -   | -       | -       | -   | -2.8 |
| Lab 3     | yes  | -         | -        | -    | -    | -    | -    | -   | -    | -    | -1.6 | -       | -       | -     | -       | no stat | -       | -   | -       | -    | -   | no stat | -       | -   | -0.8 |
| Lab 3     | yes  | -         | -        | -    | -    | -    | -    | -   | -    | -    | -1.5 | -       | -       | -     | -       | no stat | -       | -   | -       | -    | -   | no stat | -       | -   | -1.6 |
| Lab 4     | yes  | -         | -        | -    | -    | -    | -    | -   | -0.1 | 1.2  | 1.1  | -       | -       | -2.6  | -3.8    | -       | -       | -   | -       | 0.4  | -   | -       | -       | -   | 0.8  |
| Lab 4     | yes  | -         | -        | -    | -    | -    | -    | -   | 0.6  | 1.4  | 1.2  | -       | -       | -2.3  | -3.5    | -       | -       | -   | -       | 0.4  | -   | -       | -       | -   | 1.0  |
| Lab 5     | yes  | -         | -        | -    | -    | -    | -    | -   | -3.2 | 0.7  | 0.4  | -       | -       | -0.9  | -       | -       | -       | -   | -       | -    | -   | -       | -       | -   | -    |
| Lab 5     | yes  | -         | -        | -    | -    | -    | -    | -   | -2.4 | 0.1  | -0.1 | -       | -       | 1.4   | -       | -       | -       | -   | -       | -    | -   | -       | -       | -   | -    |
| Lab 6     | no   | -         | -        | -    | -    | -    | -    | -   | 1.5  | -    | 0.2  | -       | 0.2     | 6.6   | 1.2     | -       | no stat | -   | -       | -    | -   | -       | -       | -   | -    |
| Lab 6     | no   | -         | -        | -    | -    | -    | -    | -   | 1.7  | -    | 0.5  | no stat | 3.3     | 4.6   | 2.0     | -       | no stat | -   | -       | -    | -   | -       | -       | -   | 12.9 |
| Lab 7     | yes  | -         | -        | -    | -    | -    | -    | -   | -    | -    | 1.9  | -       | -       | -     | -       | -       | -       | -   | -       | -    | -   | -       | -       | -   | -    |
| Lab 7     | yes  | -         | -        | -    | -    | -    | -    | -   | -    | -    | 0.1  | -       | -       | -     | -       | -       | -       | -   | -       | -    | -   | -       | -       | -   | -    |
| Lab 8     | no   | -2.8      | no stat  | -    | -    | -    | -    | -   | -4.0 | -    | -3.3 | -       | -       | -3.6  | -       | no stat | -       | -   | no stat | -1.6 | -   | no stat | no stat | -   | -    |
| Lab 8     | no   | -2.5      | no stat  | -    | -    | -    | -    | -   | -    | -    | -3.1 | -       | -       | -3.2  | -       | no stat | -       | -   | no stat | -2.3 | -   | no stat | no stat | -   | -    |
| Lab 9     | no   | -         | -        | -    | -    | -    | -    | -   | 0.5  | -0.5 | 1.4  | -       | -0.4    | 0.9   | -1.1    | -       | -       | -   | -       | -    | -   | -       | -       | -   | 1.6  |
| Lab 9     | no   | -         | -        | -    | -    | -    | -    | -   | 0.4  | -1.1 | 1.1  | -       | -0.3    | 0.5   | -0.8    | -       | -       | -   | -       | -    | -   | -       | -       | -   | 0.9  |
| Lab 10    | no   | 0.3       | -        | -    | -    | -    | -    | -   | -0.2 | -1.9 | 0.9  | -       | -       | 0.3   | 0.7     | -       | -       | -   | -       | -    | -   | -       | -       | -   | 0.2  |
| Lab 10    | no   | -0.5      | -        | -    | -    | -    | -    | -   | -0.3 | -2.8 | 0.5  | -       | -       | 0.3   | -0.1    | -       | -       | -   | -       | -    | -   | -       | -       | -   | -0.7 |

| Lab Cod e | ISTD | 15-AcDO N | 3-AcDO N | AFB1 | AFB2 | AFG1 | AFG2 | AOH     | BEA  | D3G  | DON  | ENN-A | ENN -A1 | ENN-B | ENN -B1 | FB1     | FB2     | FB3 | HT-2 | MON  | NIV  | OTA     | OTB | T-2     | ZEN  |
|-----------|------|-----------|----------|------|------|------|------|---------|------|------|------|-------|---------|-------|---------|---------|---------|-----|------|------|------|---------|-----|---------|------|
| Lot 10    |      |           |          |      |      |      |      |         |      |      |      |       |         |       |         |         |         |     |      |      |      |         |     |         |      |
| Lab 1     | yes  | -         | -        | -    | -    | -    | -    | -       | -1.9 | -    | 1.7  | -     | -       | -2.5  | -1.4    | -       | -       | -   | -    | 2.1  | -    | -       | -   | -       | 0.8  |
| Lab 1     | yes  | -         | -        | -    | -    | -    | -    | -       | -2.2 | -    | 1.7  | -     | -       | -2.7  | -1.6    | -       | -       | -   | -    | 2.1  | -    | -       | -   | -       | 0.5  |
| Lab 2     | no   | -0.5      | -        | -    | -    | -    | -    | -       | 1.0  | 0.5  | -2.0 | -0.2  | 1.7     | 0.0   | 1.3     | no stat | -       | -   | 3.3  | -1.2 | 0.2  | -       | -   | -       | -1.1 |
| Lab 2     | no   | 1.5       | -        | -    | -    | -    | -    | -       | 0.5  | 0.4  | -1.8 | 0.0   | 2.0     | 0.1   | 1.6     | no stat | -       | -   | 1.2  | -0.4 | 1.0  | -       | -   | -       | -0.6 |
| Lab 3     | yes  | -         | -        | -    | -    | -    | -    | -       | -    | -    | -1.3 | -     | -       | -     | -       | no stat | no stat | -   | -0.6 | -    | -    | no stat | -   | no stat | -0.2 |
| Lab 3     | yes  | -         | -        | -    | -    | -    | -    | -       | -    | -    | -1.1 | -     | -       | -     | -       | no stat | no stat | -   | 0.2  | -    | -    | no stat | -   | no stat | 1.5  |
| Lab 4     | yes  | -         | -        | -    | -    | -    | -    | -       | -0.9 | -0.4 | 0.2  | -     | -       | -2.9  | -3.7    | -       | -       | -   | -    | 0.1  | 1.0  | -       | -   | -       | 0.6  |
| Lab 4     | yes  | -         | -        | -    | -    | -    | -    | -       | -0.6 | -0.3 | -0.1 | -     | -       | -2.8  | -3.6    | -       | -       | -   | -    | 0.2  | 1.1  | -       | -   | -       | 0.4  |
| Lab 5     | yes  | -         | -        | -    | -    | -    | -    | -       | -2.4 | 1.6  | 1.5  | -     | 2.5     | 0.9   | 3.0     | -       | -       | -   | -    | -    | -    | -       | -   | -       | -    |
| Lab 5     | yes  | -         | -        | -    | -    | -    | -    | -       | -0.9 | 1.0  | 0.0  | -     | -0.5    | -0.5  | -0.1    | -       | -       | -   | -    | -    | 1.5  | -       | -   | -       | -    |
| Lab 6     | no   | -         | -        | -    | -    | -    | -    | -       | 4.6  | -    | 0.0  | 0.9   | 1.8     | 6.2   | 3.1     | -       | no stat | -   | -    | -    | -    | -       | -   | -       | 5.6  |
| Lab 6     | no   | -         | -        | -    | -    | -    | -    | -       | 2.1  | -    | -0.2 | 0.9   | 2.3     | 5.2   | 1.9     | -       | -       | -   | -    | -    | -    | -       | -   | -       | 3.9  |
| Lab 7     | yes  | -         | -        | -    | -    | -    | -    | -       | -    | -    | 0.2  | -     | -       | -     | -       | -       | -       | -   | -    | -    | -    | -       | -   | -       | -    |
| Lab 7     | yes  | -         | -        | -    | -    | -    | -    | -       | -    | -    | -0.7 | -     | -       | -     | -       | -       | -       | -   | -    | -    | -    | -       | -   | -       | -    |
| Lab 8     | no   | -3.7      | -        | -    | -    | -    | -    | -       | 0.3  | -    | -4.1 | -     | -3.2    | 1.8   | -1.2    | -       | no stat | -   | -1.5 | -1.0 | -2.1 | -       | -   | -       | -4.1 |
| Lab 8     | no   | -3.7      | -        | -    | -    | -    | -    | -       | 0.4  | -    | -4.1 | -     | -3.1    | 2.1   | -1.0    | -       | no stat | -   | -1.7 | -1.0 | -2.1 | -       | -   | -       | -4.1 |
| Lab 9     | no   | -0.1      | no stat  | -    | -    | -    | -    | no stat | 0.2  | -    | 2.1  | -1.0  | -0.8    | -0.3  | -0.4    | -       | -       | -   | -    | -    | -    | -       | -   | -       | -0.1 |
| Lab 9     | no   | 2.3       | no stat  | -    | -    | -    | -    | no stat | -0.5 | -    | 1.2  | -0.5  | -0.2    | 0.0   | -0.3    | -       | -       | -   | -    | -    | -    | -       | -   | -       | -0.2 |
| Lab 10    | no   | 1.5       | no stat  | -    | -    | -    | -    | no stat | 0.5  | -2.0 | 2.3  | -     | -1.0    | 0.3   | 0.9     | -       | -       | -   | -    | -    | 0.0  | -       | -   | -       | -0.8 |
| Lab 10    | no   | 0.4       | no stat  | -    | -    | -    | -    | no stat | 0.5  | -2.8 | 2.5  | -     | -1.5    | 0.5   | 1.1     | -       | -       | -   | -    | -    | -1.3 | -       | -   | -       | -0.2 |

#### 4. Overview of z-score deviations

**Table S10:** Overview of analyte specific z-score deviations from  $\pm 2$  per laboratory and matrix

| Analyte                    | Soy         |      |     |       | Gluten      |      |     |       | Chicken     |      |     |       | Swine       |      |     |       | sp of dev in % |
|----------------------------|-------------|------|-----|-------|-------------|------|-----|-------|-------------|------|-----|-------|-------------|------|-----|-------|----------------|
|                            | $\geq 6$ dp | < -2 | > 2 | % dev | $\geq 6$ dp | < -2 | > 2 | % dev | $\geq 6$ dp | < -2 | > 2 | % dev | $\geq 6$ dp | < -2 | > 2 | % dev |                |
| Aflatoxin B1               | -           | -    | -   | -     | 3           | -    | -   | 0     | 3           | -    | -   | 0     | 1           | -    | -   | 0     | 0              |
| Aflatoxin B2               | -           | -    | -   | -     | -           | -    | -   | -     | -           | -    | -   | -     | -           | -    | -   | -     | -              |
| Aflatoxin G1               | -           | -    | -   | -     | 2           | -    | -   | 0     | -           | -    | -   | -     | -           | -    | -   | -     | 0              |
| Aflatoxin G2               | -           | -    | -   | -     | -           | -    | -   | -     | -           | -    | -   | -     | -           | -    | -   | -     | -              |
| Deoxynivalenol             | -           | -    | -   | -     | 10          | -    | 3   | 30    | 10          | 1    | 4   | 50    | 10          | 1    | 1   | 20    | 33             |
| Fumonisin B1               | -           | -    | -   | -     | 10          | 2    | 2   | 40    | 10          | 1    | 1   | 20    | 10          | 1    | 2   | 30    | 30             |
| Fumonisin B2               | -           | -    | -   | -     | 10          | 1    | 1   | 20    | 8           | 1    | 2   | 38    | 8           | 1    | 2   | 38    | 31             |
| HT-2 toxin                 | -           | -    | -   | -     | 8           | 1    | 1   | 25    | 4           | -    | -   | 0     | 3           | -    | 1   | 33    | 20             |
| Ochratoxin A               | -           | -    | -   | -     | 9           | 1    | 1   | 22    | 6           | 1    | 2   | 50    | 7           | 1    | 1   | 29    | 32             |
| T-2 toxin                  | -           | -    | -   | -     | 10          | -    | 1   | 10    | 8           | -    | 1   | 13    | 6           | -    | 1   | 17    | 13             |
| Zearalenone                | 7           | -    | 2   | 29    | 10          | 1    | 1   | 20    | 10          | -    | -   | 0     | 10          | 1    | 1   | 20    | 16             |
| 15-Acetyl-Deoxynivalenol   | -           | -    | -   | -     | 6           | 1    | 2   | 50    | 4           | -    | -   | 0     | 6           | 1    | 2   | 50    | 38             |
| 3-Acetyl-Deoxynivalenol    | -           | -    | -   | -     | 3           | 1    | -   | 33    | 1           | -    | -   | 0     | 4           | 1    | -   | 25    | 25             |
| Alternariol                | -           | -    | -   | -     | 7           | 1    | 2   | 43    | 6           | 1    | 2   | 50    | 6           | 2    | 1   | 50    | 47             |
| Beauvericin                | 6           | 1    | 1   | 33    | 7           | 1    | 2   | 43    | 8           | 1    | 2   | 38    | 8           | 1    | -   | 13    | 31             |
| Deoxynivalenol-3-Glucoside | -           | -    | -   | -     | 1           | -    | -   | 0     | 3           | -    | -   | 0     | 5           | -    | -   | 0     | 0              |
| Enniatin A                 | -           | -    | -   | -     | 2           | -    | -   | 0     | 2           | -    | -   | 0     | 5           | 1    | -   | 20    | 11             |
| Enniatin A 1               | 4           | -    | -   | 0     | 4           | 1    | -   | 25    | 6           | 1    | 1   | 33    | 8           | 1    | -   | 13    | 18             |
| Enniatin B                 | 6           | 1    | 1   | 33    | 7           | -    | 2   | 29    | 7           | 1    | 2   | 43    | 8           | 1    | 1   | 25    | 32             |
| Enniatin B1                | 5           | -    | 1   | 20    | 6           | 1    | -   | 17    | 8           | 1    | 1   | 25    | 8           | 1    | 1   | 25    | 22             |
| Fumonisin B3               | -           | -    | -   | -     | 6           | -    | -   | 0     | 3           | -    | -   | 0     | 2           | -    | -   | 0     | 0              |
| Moniliformin               | -           | -    | -   | -     | 4           | -    | -   | 0     | 4           | -    | -   | 0     | 4           | -    | 1   | 25    | 8              |
| Nivalenol                  | -           | -    | -   | -     | -           | -    | -   | -     | 1           | -    | -   | 0     | 4           | -    | -   | 0     | 0              |
| Ochratoxin B               | -           | -    | -   | -     | 1           | -    | -   | 0     | -           | -    | -   | -     | 1           | -    | -   | 0     | 0              |

The table includes an overview of possible average z-score data evaluable per matrix. This calculation is based on the number of z-scores calculated in this study. Each laboratory (in total 10) which provided  $\geq 6$  z-score data points ( $\geq 6$  dp) per matrix was taking into account, resulting in a maximum of 10 possible data points per analyte/matrix combination. In addition, information about tendencies in under (< -2) and overestimations (> 2) per analyte are provided. Based on that informational content, the total share of deviations in percent (% dev) were calculated for each substance. Finally, a sum product was derived in percent (sp of dev in %) for each compound in order to reflect a weighted average value for the interpretation of the analyte specific performance. This information acts as the basis for the interpretation of matrix independent tendencies in deviations for the total scope of this study. Average deviations lower 25% are marked as green, data above as yellow indicating general problem with this compound in all matrices.

## 5. Regulatory framework of the European Union

**Table S11:** Overview of EU regulated mycotoxins

| Mycotoxin                                          | Regulated Commodities                                                                                                                                                                                                                                                                                                                                                                                                 | Maximum Levels Food | Maximum Levels Feed |
|----------------------------------------------------|-----------------------------------------------------------------------------------------------------------------------------------------------------------------------------------------------------------------------------------------------------------------------------------------------------------------------------------------------------------------------------------------------------------------------|---------------------|---------------------|
| Aflatoxins<br>- AFB1<br>- AFB2<br>- AFG1<br>- AFG2 | Groundnuts, almonds, pistachios, brazil nuts, tree nuts, dried fruit, corn, rice, cereals, milk, apricot kernels, infant formula, dried figs, all feed materials                                                                                                                                                                                                                                                      | 0.05 - 15 µg/kg     | 5 - 20 µg/kg        |
| Citrinin                                           | Food supplements (based on rice fermented with red yeast)                                                                                                                                                                                                                                                                                                                                                             | 2000 µg/kg          |                     |
| Deoxynivalenol                                     | Unprocessed cereals, durum wheat, oats and corn, cereal flour, corn flour, corn, grits, corn meal, bread biscuits, pastries, cereal snacks, breakfast cereals, dry pasta, processed cereal based baby and infant food, cereals and cereal products, corn by-products, complementary and complete feeding stuffs                                                                                                       | 200 - 1250 µg/kg    | 0.9 - 12 mg/kg      |
| Ergot alkaloids                                    | Milling products of barley, wheat, spelt and oats, barley, wheat, spelt, oat grains and rye, rye milling products, wheat gluten, processed cereal based food for infants and young chicken, feed materials containing unground cereal                                                                                                                                                                                 | 20 - 500 µg/kg      | 1000 mg/kg          |
| Fumonisin<br>- FB1<br>- FB2                        | Unprocessed corn, corn, corn based foods, breakfast cereals and snacks, processed corn based foods and baby foods for infants and young children, complementary and complete feeding stuffs                                                                                                                                                                                                                           | 200 - 4000 µg/kg    | 5 - 60 mg/kg        |
| Ochratoxin A                                       | Unprocessed cereals and all products derived from them, dried wine fruit, wine, fruit wine, flavored wine, grape juice, roasted coffee beans, ground roasted coffee, soluble coffee, species of spices, mixtures of sices, liquorice root and extract, baby foods and processed cereal based foods for infants and young children, dietary foods for infants, wheat gluten, complementary and complete feeding stuffs | 0.5 - 80 µg/kg      | 0.05 - 0.25 mg/kg   |
| Patulin                                            | Fruit juices and fruit nectar containing apple juice or derived from apples, spirit drinks, cider, fermented drinks from apples, solid apple products, apple puree, apple juice and products for infants and young children                                                                                                                                                                                           | 10 - 50 µg/kg       | -                   |
| T2 Toxin & HT2-Toxin                               | Unprocessed cereals, cereal grains for direct human consumption, cereal products for human consumption, cereal products for feed and compound feed                                                                                                                                                                                                                                                                    | 15 - 1000 µg/kg     | 50 - 2000 µg/kg     |
| Zearalenone                                        | Unprocessed cereals and corn, cereals, corn and bran intended for direct human consumption, cereal flour, corn based snacks and cereals, refined corn oil, bread, pastries, biscuits, cereal snacks, breakfast cereals, processed cereal and corn based foods and baby foods for infants and young children                                                                                                           | 20 - 400 µg/kg      | 0.1 - 2 mg/kg       |

## 6. Control Standard Solutions

**Table S12:** Preparation scheme of the control solutions provided by the study organizer. The participants were informed to dilute the standard mixtures (conc. mix) of each vial in a ratio of 1:10 by using the same solvent as for their calibration standards.

| VIAL<br>1      |                         |          |                 |                    |                        |                           |
|----------------|-------------------------|----------|-----------------|--------------------|------------------------|---------------------------|
| analyte        | conc.<br>stock<br>µg/mL | Lot no.  | dilution factor | µL<br>standar<br>d | conc.<br>mix<br>[µg/L] | target<br>conc.<br>[µg/L] |
| aflatoxin B1   | 1.04                    | 10002879 | 50              | 160                | 20.8                   | 2.08                      |
| aflatoxin B2   | 1.03                    |          |                 |                    | 20.6                   | 2.06                      |
| aflatoxin G1   | 1.01                    |          |                 |                    | 20.2                   | 2.02                      |
| aflatoxin G2   | 1.03                    |          |                 |                    | 20.6                   | 2.06                      |
| HT-2 toxin     | 100                     | 10000352 | 200             | 40                 | 2000                   | 200                       |
| T-2 toxin      | 100                     | 10003663 |                 | 40                 | 2000                   | 200                       |
| ochratoxin A   | 10.03                   | 10003658 | 500             | 16                 | 201                    | 20.1                      |
| zearalenone    | 100                     | 10003660 |                 | 16                 | 2000                   | 200                       |
| deoxynivalenol | 100                     | 10000334 | 100             | 80                 | 2000                   | 200                       |
| sum [µL]:      |                         |          |                 | 352                |                        |                           |
| ACN [µL]:      |                         |          |                 | 7648               |                        |                           |
| total [µL]:    |                         |          |                 | 8000               |                        |                           |

| VIAL<br>2    |                         |          |                                    |                    |                        |                           |
|--------------|-------------------------|----------|------------------------------------|--------------------|------------------------|---------------------------|
| analyte      | conc.<br>stock<br>µg/mL | Lot no.  | dilution factor                    | µL<br>standar<br>d | conc.<br>mix<br>[µg/L] | target<br>conc.<br>[µg/L] |
| fumonisin B1 | 50.1                    | 10003642 | 50                                 | 160                | 1002                   | 100                       |
| fumonisin B2 | 50.0                    | 10003643 |                                    | 160                | 1000                   | 100                       |
| fumonisin B3 | 50.9                    | 10003645 |                                    | 160                | 1018                   | 102                       |
|              |                         |          | sum [µL]:                          | 480                |                        |                           |
|              |                         |          | ACN/H <sub>2</sub> O (50/50) [µL]: | 7520               |                        |                           |
|              |                         |          | total [µL]:                        | 8000               |                        |                           |

## 7. Lab specific methodology

**Table S13:** Lab 001 method information

| Scope                         | LOQ<br>(µg/kg) | Quantifier<br>transition(m/z<br>> m/z) | Qualifier<br>transition<br>(m/z > m/z) | Pig<br>Feed<br>Recovery<br>value (%) | Soy<br>Bean<br>Recovery<br>value (%) | Chicken<br>Feed<br>Recovery<br>value (%) | Corn<br>Gluten<br>Recovery<br>value (%) |
|-------------------------------|----------------|----------------------------------------|----------------------------------------|--------------------------------------|--------------------------------------|------------------------------------------|-----------------------------------------|
| <b>Mycotoxins (mandatory)</b> |                |                                        |                                        |                                      |                                      |                                          |                                         |
| aflatoxin B1                  | 3              | 312.9 : 285.0                          | 312.9 : 240.9                          | 99.8                                 | 100                                  | 100                                      | 100                                     |
| aflatoxin B2                  | 3              | 315.0 : 287.0                          | 315.0 : 258.9                          | 98.2                                 | 100                                  | 100                                      | 100                                     |
| aflatoxin G1                  | 3              | 329.0 : 242.9                          | 329.0 : 200.0                          | 103                                  | 100                                  | 100                                      | 100                                     |
| aflatoxin G2                  | 3              | 331.0 : 245.0                          | 331.0 : 115.2                          | 102                                  | 100                                  | 100                                      | 100                                     |
| deoxynivalenol                | 500            | 355.0 : 58.9                           | 355.0 : 294.9                          | 106                                  | 100                                  | 100                                      | 100                                     |
| fumonisin B1                  | 15             | 722.5 : 334.2                          | 722.5 : 352.2                          | 60.0                                 | 100                                  | 100                                      | 100                                     |
| fumonisin B2                  | 15             | 706.4 : 336.2                          | 706.4 : 318.2                          | 72.6                                 | 100                                  | 100                                      | 100                                     |
| HT-2 toxin                    | 50             | 442.2 : 263.1                          | 442.2 : 215.0                          | 112                                  | 100                                  | 100                                      | 100                                     |
| ochratoxin A                  | 2              | 404.1 : 238.9                          | 404.1 : 358.1                          | 98.4                                 | 100                                  | 100                                      | 100                                     |
| T-2 toxins                    | 3              | 484.3 : 305.0                          | 484.3 : 245.1                          | 109                                  | 100                                  | 100                                      | 100                                     |
| zearalenone                   | 5              | 316.6 : 130.9                          | 316.6 : 174.8                          | 111                                  | 100                                  | 100                                      | 100                                     |
| <b>Mycotoxins (voluntary)</b> |                |                                        |                                        |                                      |                                      |                                          |                                         |
| 15-acetyl-deoxynivalenol      | 1000           | 356.2 : 145.0                          | 356.2 : 338.2                          | 112                                  | 100                                  | 100                                      | 100                                     |
| 3-acetyl-deoxynivalenol       | 150            | 397.0 : 58.9                           | 397.0 : 336.9                          | 107                                  | 100                                  | 100                                      | 100                                     |
| alternariol                   | 15             | 257.0 : 212.8                          | 257.0 : 214.8                          | 51.3                                 | 83.1                                 | 70.6                                     | 63.4                                    |
| beauvericin                   | 4              | 801.4 : 784.3                          | 801.4 : 244.3                          | 115                                  | 88.8                                 | 65.7                                     |                                         |
| deoxynivalenol-3-glucoside    | 350            | 517.2 : 456.9                          | 517.2 : 59.0                           | 79.4                                 | 100                                  | 100                                      | 100                                     |
| enniatin A                    | 3              | 699.1 : 682.7                          | 699.1 : 210.4                          | 111                                  | 96.1                                 | 78.7                                     | 81.5                                    |
| enniatin A1                   | 3              | 685.5 : 668.4                          | 685.5 : 210.1                          | 127                                  | 88.0                                 | 63.1                                     | 57.6                                    |
| enniatin B                    | 3              | 657.1 : 640.5                          | 657.1 : 196.0                          | 104                                  |                                      |                                          |                                         |
| enniatin B1                   | 3              | 671.0 : 654.3                          | 671.0 : 196.4                          | 123                                  | 96.7                                 | 90.4                                     | 86.4                                    |
| fumonisin B3                  | 15             | 706.5 : 336.2                          | 706.5 : 81.1                           | 70.9                                 | 100                                  | 100                                      | 100                                     |
| moniliformin                  | 10             | 96.9 : 40.9                            |                                        | 70.2                                 | 149                                  | 137                                      | 115                                     |
| nivalenol                     | 1000           | 371.1 : 280.8                          | 371.1 : 59.0                           | 90.9                                 | 100                                  | 100                                      | 100                                     |
| ochratoxin B                  | 2              | 370.1 : 205.0                          | 370.1 : 187.1                          | 82.6                                 | 39.3                                 | 40.3                                     | 35.9                                    |



**Table S14:** Lab 002 method information

| Scope                         | LOQ<br>(µg/kg) | Quantifier<br>transition(m/z<br>> m/z) | Qualifier<br>transition<br>(m/z > m/z) | Pig<br>Feed<br>Recovery<br>value (%) | Soy<br>Bean<br>Recovery<br>value (%) | Chicken<br>Feed<br>Recovery<br>value (%) | Corn<br>Gluten<br>Recovery<br>value (%) |
|-------------------------------|----------------|----------------------------------------|----------------------------------------|--------------------------------------|--------------------------------------|------------------------------------------|-----------------------------------------|
| <b>Mycotoxins (mandatory)</b> |                |                                        |                                        |                                      |                                      |                                          |                                         |
| aflatoxin B1                  | 0.72           | 313 > 285                              | 313 > 128                              | 41                                   | 49                                   | 36                                       | 27                                      |
| aflatoxin B2                  | 0.21           | 315 > 287                              | 315 > 259                              | 44                                   | 49                                   | 43                                       | 36                                      |
| aflatoxin G1                  | 0.54           | 329 > 243                              | 329 > 200                              | 43                                   | 45                                   | 43                                       | 30                                      |
| aflatoxin G2                  | 1.69           | 331 > 313                              | 331 < 245                              | 43                                   | 45                                   | 43                                       | 30                                      |
| deoxynivalenol                | 3.00           | 355 > 265                              | 355 > 59                               | 80                                   | 73                                   | 80                                       | 60                                      |
| fumonisin B1                  | 7.98           | 72 > 334                               | 722 > 352                              | 66                                   | 18                                   | 59                                       | 70                                      |
| fumonisin B2                  | 7.08           | 706 > 336                              | 706 > 318                              | 75                                   | 58                                   | 68                                       | 70                                      |
| HT-2 toxin                    | 5.00           | 442 > 263                              | 442 > 215                              | 77                                   | 85                                   | 74                                       | 43                                      |
| ochratoxin A                  | 1.50           | 404 < 239                              | 404 > 102                              | 92                                   | 93                                   | 85                                       | 66                                      |
| T-2 toxins                    | 2.40           | 484 > 215                              | 484 > 185                              | 76                                   | 87                                   | 77                                       | 56                                      |
| zearalenone                   | 0.63           | 317 > 175                              | 317 > 131                              | 84                                   | 39                                   | 84                                       | 56                                      |
| <b>Mycotoxins (voluntary)</b> |                |                                        |                                        |                                      |                                      |                                          |                                         |
| 15-acetyl-deoxynivalenol      | 15.0           | 339 > 321                              | 339 > 137                              | 86                                   | 66                                   | 80                                       | 66                                      |
| 3-acetyl-deoxynivalenol       | 15.0           | 397 > 59                               | 397 > 307                              | 58                                   | 58                                   | 59                                       | 58                                      |
| alternariol                   | 0.32           | 257 > 213                              | 257 > 215                              | 57                                   | 46                                   | 52                                       | 51                                      |
| beauvericin                   | 0.10           | 801 > 244                              | 801 > 134                              | 100                                  | 100                                  | 100                                      | 100                                     |
| deoxynivalenol-3-glucoside    | 3.00           | 517 > 427                              | 517 > 59                               | 80                                   | 80                                   | 80                                       | 66                                      |
| enniatin A                    | 0.03           | 699 > 210                              | 699 < 228                              | 79                                   | 79                                   | 79                                       | 79                                      |
| enniatin A1                   | 0.20           | 685 > 210                              | 685 < 228                              | 91                                   | 91                                   | 91                                       | 91                                      |
| enniatin B                    | 0.04           | 657 > 196                              | 657 > 214                              | 91                                   | 91                                   | 91                                       | 91                                      |
| enniatin B1                   | 0.11           | 671 > 196                              | 671 > 210                              | 82                                   | 82                                   | 82                                       | 82                                      |
| fumonisin B3                  | 7.00           | 706 > 336                              | 706 > 318                              | 75                                   | 58                                   | 68                                       | 70                                      |
| moniliformin                  | 5.00           | 96.9 > 41.2                            |                                        | 98                                   | 99                                   | 101                                      | 100                                     |
| nivalenol                     | 2.60           | 371 > 281                              | 371 > 59                               | 80                                   | 80                                   | 80                                       | 66                                      |
| ochratoxin B                  | 0.36           | 380 > 205                              | 370 > 203                              | 82                                   | 82                                   | 82                                       | 65                                      |

**Table S15:** Lab 003 method information

| Scope                         | LOQ<br>(µg/kg) | Quantifier<br>transition(m/z<br>> m/z) | Qualifier<br>transition<br>(m/z > m/z) | Pig<br>Feed<br>Recover<br>y<br>value (%) | Soy<br>Bean<br>Recover<br>y<br>value (%) | Chicken<br>Feed<br>Recovery<br>value (%) | Corn<br>Gluten<br>Recovery<br>value (%) |
|-------------------------------|----------------|----------------------------------------|----------------------------------------|------------------------------------------|------------------------------------------|------------------------------------------|-----------------------------------------|
| <b>Mycotoxins (mandatory)</b> |                |                                        |                                        |                                          |                                          |                                          |                                         |
| aflatoxin B1                  | 0.2            | 313,1>285                              | 313,1>241                              |                                          |                                          |                                          |                                         |
| aflatoxin B2                  | 0.2            | 315,1>258,9                            | 315,1>287                              |                                          |                                          |                                          |                                         |
| aflatoxin G1                  | 0.2            | 329,1>243                              | 329,1>200,1                            |                                          |                                          |                                          |                                         |
| aflatoxin G2                  | 0.2            | 331,1>245,1                            | 331,1>313                              |                                          |                                          |                                          |                                         |
| deoxynivalenol                | 40             | 297,1>249                              | 297,1>203                              |                                          |                                          |                                          |                                         |
| fumonisin B1                  | 100            | 722,4>334,4                            | 722,4>352,4                            |                                          |                                          |                                          |                                         |
| fumonisin B2                  | 100            | 706,4>336,4                            | 706,4>318,3                            |                                          |                                          |                                          |                                         |
| HT-2 toxin                    | 5              | 442,2>263                              | 442,2>215                              |                                          |                                          |                                          |                                         |
| ochratoxin A                  | 2              | 404,1>238,9                            | 404,1>102,1                            |                                          |                                          |                                          |                                         |
| T-2 toxins                    | 5              | 484,3>305                              | 484,3>215,1                            |                                          |                                          |                                          |                                         |
| zearalenone                   | 20             | 317,1>272,9                            | 317,1>130,9                            |                                          |                                          |                                          |                                         |
| <b>Mycotoxins (voluntary)</b> |                |                                        |                                        |                                          |                                          |                                          |                                         |
| 15-acetyl-deoxynivalenol      |                |                                        |                                        |                                          |                                          |                                          |                                         |
| 3-acetyl-deoxynivalenol       |                |                                        |                                        |                                          |                                          |                                          |                                         |
| alternariol                   |                |                                        |                                        |                                          |                                          |                                          |                                         |
| beauvericin                   |                |                                        |                                        |                                          |                                          |                                          |                                         |
| deoxynivalenol-3-glucoside    |                |                                        |                                        |                                          |                                          |                                          |                                         |
| enniatin A                    |                |                                        |                                        |                                          |                                          |                                          |                                         |
| enniatin A1                   |                |                                        |                                        |                                          |                                          |                                          |                                         |
| enniatin B                    |                |                                        |                                        |                                          |                                          |                                          |                                         |
| enniatin B1                   |                |                                        |                                        |                                          |                                          |                                          |                                         |
| fumonisin B3                  |                |                                        |                                        |                                          |                                          |                                          |                                         |
| moniliformin                  |                |                                        |                                        |                                          |                                          |                                          |                                         |
| nivalenol                     |                |                                        |                                        |                                          |                                          |                                          |                                         |
| ochratoxin B                  |                |                                        |                                        |                                          |                                          |                                          |                                         |

Table S16: Lab 004 method information

| Scope                         | LOQ (µg/kg) | Quantifier transition(m/z > m/z) | Qualifier transition(m/z > m/z) | Pig Feed Recovery value (%) | Soy Bean Recovery value (%) | Chicken Feed Recovery value (%) | Corn Gluten Recovery value (%) |
|-------------------------------|-------------|----------------------------------|---------------------------------|-----------------------------|-----------------------------|---------------------------------|--------------------------------|
| <b>Mycotoxins (mandatory)</b> |             |                                  |                                 |                             |                             |                                 |                                |
| aflatoxin B1                  |             | 312.9 : 285.0                    | 312.9 : 240.9                   |                             |                             |                                 |                                |
| aflatoxin B2                  |             | 315.0 : 287.0                    | 315.0 : 258.9                   |                             |                             |                                 |                                |
| aflatoxin G1                  |             | 329.0 : 242.9                    | 329.0 : 200.0                   |                             |                             |                                 |                                |
| aflatoxin G2                  |             | 331.0 : 245.0                    | 331.0 : 115.2                   |                             |                             |                                 |                                |
| deoxynivalenol                |             | 355.0 : 58.9                     | 355.0 : 294.9                   |                             |                             |                                 |                                |
| fumonisin B1                  |             | 722.5 : 334.2                    | 722.5 : 352.2                   |                             |                             |                                 |                                |
| fumonisin B2                  |             | 706.4 : 336.2                    | 706.4 : 318.2                   |                             |                             |                                 |                                |
| HT-2 toxin                    |             | 442.2 : 263.1                    | 442.2 : 215.0                   |                             |                             |                                 |                                |
| ochratoxin A                  |             | 404.1 : 238.9                    | 404.1 : 358.1                   |                             |                             |                                 |                                |
| T-2 toxins                    |             | 484.3 : 305.0                    | 484.3 : 245.1                   |                             |                             |                                 |                                |
| zearalenone                   |             | 316.6 : 130.9                    | 316.6 : 174.8                   |                             |                             |                                 |                                |
| <b>Mycotoxins (voluntary)</b> |             |                                  |                                 |                             |                             |                                 |                                |
| 15-acetyl-deoxynivalenol      |             | 356.2 : 145.0                    | 356.2 : 338.2                   |                             |                             |                                 |                                |
| 3-acetyl-deoxynivalenol       |             | 397.0 : 58.9                     | 397.0 : 336.9                   |                             |                             |                                 |                                |
| alternariol                   |             | 257.0 : 212.8                    | 257.0 : 214.8                   |                             |                             |                                 |                                |
| beauvericin                   |             | 801.4 : 784.3                    | 801.4 : 244.3                   |                             |                             |                                 |                                |
| deoxynivalenol-3-glucoside    |             | 517.2 : 456.9                    | 517.2 : 59.0                    |                             |                             |                                 |                                |
| enniatin A                    |             | 699.1 : 682.7                    | 699.1 : 210.4                   |                             |                             |                                 |                                |
| enniatin A1                   |             | 685.5 : 668.4                    | 685.5 : 210.1                   |                             |                             |                                 |                                |
| enniatin B                    |             | 657.1 : 640.5                    | 657.1 : 196.0                   |                             |                             |                                 |                                |
| enniatin B1                   |             | 671.0 : 654.3                    | 671.0 : 196.4                   |                             |                             |                                 |                                |
| fumonisin B3                  |             | 706.5 : 336.2                    | 706.5 : 81.1                    |                             |                             |                                 |                                |
| moniliformin                  |             | 96.9 : 40.9                      |                                 |                             |                             |                                 |                                |
| nivalenol                     |             | 371.1 : 280.8                    | 371.1 : 59.0                    |                             |                             |                                 |                                |
| ochratoxin B                  |             | 370.1 : 205.0                    | 370.1 : 187.1                   |                             |                             |                                 |                                |

Table S17: Lab 005 method information

| Scope                         | LOQ<br>(µg/kg) | Quantifier<br>transition(m/z<br>> m/z) | Qualifier<br>transition<br>(m/z > m/z) | Pig<br>Feed<br>Recover<br>y<br>value (%) | Soy<br>Bean<br>Recover<br>y<br>value (%) | Chicken<br>Feed<br>Recovery<br>value (%) | Corn<br>Gluten<br>Recovery<br>value (%) |
|-------------------------------|----------------|----------------------------------------|----------------------------------------|------------------------------------------|------------------------------------------|------------------------------------------|-----------------------------------------|
| <b>Mycotoxins (mandatory)</b> |                |                                        |                                        |                                          |                                          |                                          |                                         |
| aflatoxin B1                  | 1              | 312.9 : 285.0                          | 312.9 : 240.9                          | 102                                      | 102                                      | 111                                      | 115                                     |
| aflatoxin B2                  | 2              | 315.0 : 287.0                          | 315.0 : 258.9                          | 99                                       | 109                                      | 101                                      | 88                                      |
| aflatoxin G1                  | 2              | 329.0 : 242.9                          | 329.0 : 200.0                          | 102                                      | 82                                       | 109                                      | 93                                      |
| aflatoxin G2                  | 2              | 331.0 : 245.0                          | 331.0 : 115.2                          | 99                                       | 96                                       | 91                                       | 89                                      |
| deoxynivalenol                | 50             | 355.0 : 58.9                           | 355.0 : 294.9                          | 93                                       | 93                                       | 96                                       | 94                                      |
| fumonisin B1                  | 30             | 722.5 : 334.2                          | 722.5 : 352.2                          | 63                                       | 39                                       | 76                                       | 70                                      |
| fumonisin B2                  | 30             | 706.4 : 336.2                          | 706.4 : 318.2                          | 70                                       | 43                                       | 70                                       | 70                                      |
| HT-2 toxin                    | 50             | 442.2 : 263.1                          | 442.2 : 215.0                          | 87                                       | 98                                       | 95                                       | 115                                     |
| ochratoxin A                  | 2              | 404.1 : 238.9                          | 404.1 : 358.1                          | 92                                       | 92                                       | 97                                       | 94                                      |
| T-2 toxins                    | 30             | 484.3 : 305.0                          | 484.3 : 245.1                          | 99                                       | 104                                      | 113                                      | 125                                     |
| zearalenone                   | 10             | 316.6 : 130.9                          | 316.6 : 174.8                          | 90                                       | 113                                      | 104                                      | 103                                     |
| <b>Mycotoxins (voluntary)</b> |                |                                        |                                        |                                          |                                          |                                          |                                         |
| 15-acetyl-deoxynivalenol      | 100            | 356.2 : 145.0                          | 356.2 : 338.2                          | 90                                       | 94                                       | 96                                       | 94                                      |
| 3-acetyl-deoxynivalenol       | 100            | 397.0 : 58.9                           | 397.0 : 336.9                          | 102                                      | 136                                      | 108                                      | 111                                     |
| alternariol                   | 10             | 257.0 : 212.8                          | 257.0 : 214.8                          | 93                                       | 105                                      | 95                                       | 87                                      |
| beauvericin                   | 6              | 801.4 : 784.3                          | 801.4 : 244.3                          | 95                                       | 98                                       | 86                                       | 89                                      |
| deoxynivalenol-3-glucoside    | 50             | 517.2 : 456.9                          | 517.2 : 59.0                           | 79                                       | 84                                       | 87                                       | 86                                      |
| enniatin A                    | 3              | 699.1 : 682.7                          | 699.1 : 210.4                          | 83                                       | 101                                      | 96                                       | 50                                      |
| enniatin A1                   | 3              | 685.5 : 668.4                          | 685.5 : 210.1                          | 91                                       | 107                                      | 96                                       | 78                                      |
| enniatin B                    | 3              | 657.1 : 640.5                          | 657.1 : 196.0                          | 97                                       | 97                                       | 104                                      | 76                                      |
| enniatin B1                   | 3              | 671.0 : 654.3                          | 671.0 : 196.4                          | 100                                      | 104                                      | 91                                       | 88                                      |
| fumonisin B3                  | 30             | 706.5 : 336.2                          | 706.5 : 81.1                           | 72                                       | 43                                       | 74                                       | 68                                      |
| moniliformin                  | 20             | 96.9 : 40.9                            |                                        | 98                                       | 117                                      | 92                                       | 89                                      |
| nivalenol                     | 60             | 371.1 : 280.8                          | 371.1 : 59.0                           | 85                                       | 100                                      | 82                                       | 72                                      |
| ochratoxin B                  | 3              | 370.1 : 205.0                          | 370.1 : 187.1                          | 86                                       | 87                                       | 87                                       | 114                                     |

**Table S18:** Lab 006 method information

| Scope                         | LOQ<br>(µg/kg) | Quantifier<br>transition(m/z<br>> m/z) | Qualifier<br>transition<br>(m/z > m/z) | Pig<br>Feed<br>Recover<br>y<br>value (%) | Soy<br>Bean<br>Recover<br>y<br>value (%) | Chicken<br>Feed<br>Recovery<br>value (%) | Corn<br>Gluten<br>Recovery<br>value (%) |
|-------------------------------|----------------|----------------------------------------|----------------------------------------|------------------------------------------|------------------------------------------|------------------------------------------|-----------------------------------------|
| <b>Mycotoxins (mandatory)</b> |                |                                        |                                        |                                          |                                          |                                          |                                         |
| aflatoxin B1                  | 1.2            | 313.1 > 285.1                          | 313.1 > 213.1                          |                                          |                                          |                                          |                                         |
| aflatoxin B2                  | 1.2            | 315.1 > 287.1                          | 315.1 > 259.0                          |                                          |                                          |                                          |                                         |
| aflatoxin G1                  | 0.4            | 329.1 > 243.1                          | 329.1 > 200.0                          |                                          |                                          |                                          |                                         |
| aflatoxin G2                  | 1.2            | 331.0 > 189.1                          | 331.1 > 245.1                          |                                          |                                          |                                          |                                         |
| deoxynivalenol                | 80             | 355.1 > 265.0                          | 355.1 > 247.2                          |                                          |                                          |                                          |                                         |
| fumonisin B1                  | 120            | 722.5 > 352.3                          | 722.5 > 334.4                          |                                          |                                          |                                          |                                         |
| fumonisin B2                  | 40             | 706.4 > 336.3                          | 706.4 > 318.2                          |                                          |                                          |                                          |                                         |
| HT-2 toxin                    | 80             | 442.2 > 215.0                          | 442.5 > 215.0                          |                                          |                                          |                                          |                                         |
| ochratoxin A                  | 4.8            | 404.1 > 239.0                          | 404.1 > 101.9                          |                                          |                                          |                                          |                                         |
| T-2 toxins                    | 4.8            | 484.3 > 215.1                          | 484.1 > 185.1                          |                                          |                                          |                                          |                                         |
| zearalenone                   | 4              | 317.1 > 175.1                          | 317.1 > 131.1                          |                                          |                                          |                                          |                                         |
| <b>Mycotoxins (voluntary)</b> |                |                                        |                                        |                                          |                                          |                                          |                                         |
| 15-acetyl-deoxynivalenol      |                |                                        |                                        |                                          |                                          |                                          |                                         |
| 3-acetyl-deoxynivalenol       |                |                                        |                                        |                                          |                                          |                                          |                                         |
| alternariol                   | 12             | 257.1 > 215.1                          | 257.1 > 147.0                          |                                          |                                          |                                          |                                         |
| beauvericin                   | 0.24           | 801.4 > 243.9                          | 801.4 > 133.9                          |                                          |                                          |                                          |                                         |
| deoxynivalenol-3-glucoside    |                |                                        |                                        |                                          |                                          |                                          |                                         |
| enniatin A                    | 0.24           | 699.5 > 210.0                          | 600.5 > 228.0                          |                                          |                                          |                                          |                                         |
| enniatin A1                   | 0.24           | 685.5 > 210.0                          | 685.5 > 228.2                          |                                          |                                          |                                          |                                         |
| enniatin B                    | 0.24           | 657.4 > 196.3                          | 657.4 > 213.9                          |                                          |                                          |                                          |                                         |
| enniatin B1                   | 0.024          | 671.4 > 196.0                          | 671.4 > 209.9                          |                                          |                                          |                                          |                                         |
| fumonisin B3                  |                |                                        |                                        |                                          |                                          |                                          |                                         |
| moniliformin                  |                |                                        |                                        |                                          |                                          |                                          |                                         |
| nivalenol                     | 300            | 371.0 > 311.22                         | 371.0 > 281.1                          |                                          |                                          |                                          |                                         |
| ochratoxin B                  | 1.2            | 370.1 > 205.0                          | 370.0 > 103.0                          |                                          |                                          |                                          |                                         |

**Table S19:** Lab 007 method information

| Scope                         | LOQ<br>(µg/kg) | Quantifier<br>transition(m/z<br>> m/z) | Qualifier<br>transition<br>(m/z > m/z) | Pig<br>Feed<br>Recover<br>y<br>value (%) | Soy<br>Bean<br>Recover<br>y<br>value (%) | Chicken<br>Feed<br>Recovery<br>value (%) | Corn<br>Gluten<br>Recovery<br>value (%) |
|-------------------------------|----------------|----------------------------------------|----------------------------------------|------------------------------------------|------------------------------------------|------------------------------------------|-----------------------------------------|
| <b>Mycotoxins (mandatory)</b> |                |                                        |                                        |                                          |                                          |                                          |                                         |
| aflatoxin B1                  | 0.75           | 313                                    | 285                                    | 84                                       |                                          | 84                                       |                                         |
| aflatoxin B2                  | 0.75           | 315                                    | 287                                    | 85                                       |                                          | 85                                       |                                         |
| aflatoxin G1                  | 0.75           | 328                                    | 243                                    | 91                                       |                                          | 91                                       |                                         |
| aflatoxin G2                  | 0.75           | 331                                    | 313                                    | 96                                       |                                          | 96                                       |                                         |
| deoxynivalenol                | 50             | 355                                    | 265                                    | 90                                       |                                          | 90                                       |                                         |
| fumonisin B1                  | 25             | 722                                    | 352                                    | 80                                       |                                          | 80                                       |                                         |
| fumonisin B2                  | 25             | 706                                    | 336                                    | 82                                       |                                          | 82                                       |                                         |
| HT-2 toxin                    | 10             | 442                                    | 263                                    | 75                                       |                                          | 75                                       |                                         |
| ochratoxin A                  | 5              | 404                                    | 239                                    | 96                                       |                                          | 96                                       |                                         |
| T-2 toxins                    | 10             | 489                                    | 327                                    | 73                                       |                                          | 73                                       |                                         |
| zearalenone                   | 25             | 317                                    | 175                                    | 86                                       |                                          | 86                                       |                                         |
| <b>Mycotoxins (voluntary)</b> |                |                                        |                                        |                                          |                                          |                                          |                                         |
| 15-acetyl-deoxynivalenol      |                |                                        |                                        |                                          |                                          |                                          |                                         |
| 3-acetyl-deoxynivalenol       |                |                                        |                                        |                                          |                                          |                                          |                                         |
| alternariol                   |                |                                        |                                        |                                          |                                          |                                          |                                         |
| beauvericin                   |                |                                        |                                        |                                          |                                          |                                          |                                         |
| deoxynivalenol-3-glucoside    |                |                                        |                                        |                                          |                                          |                                          |                                         |
| enniatin A                    |                |                                        |                                        |                                          |                                          |                                          |                                         |
| enniatin A1                   |                |                                        |                                        |                                          |                                          |                                          |                                         |
| enniatin B                    |                |                                        |                                        |                                          |                                          |                                          |                                         |
| enniatin B1                   |                |                                        |                                        |                                          |                                          |                                          |                                         |
| fumonisin B3                  |                |                                        |                                        |                                          |                                          |                                          |                                         |
| moniliformin                  |                |                                        |                                        |                                          |                                          |                                          |                                         |
| nivalenol                     |                |                                        |                                        |                                          |                                          |                                          |                                         |
| ochratoxin B                  |                |                                        |                                        |                                          |                                          |                                          |                                         |

**Table S20:** Lab 008 method information

| Scope                         | LOQ (µg/kg) | Quantifier transition(m/z > m/z) | Qualifier transition (m/z > m/z) | Pig Feed Recovery value (%) | Soy Bean Recovery value (%) | Chicken Feed Recovery value (%) | Corn Gluten Recovery value (%) |
|-------------------------------|-------------|----------------------------------|----------------------------------|-----------------------------|-----------------------------|---------------------------------|--------------------------------|
| <b>Mycotoxins (mandatory)</b> |             |                                  |                                  |                             |                             |                                 |                                |
| aflatoxin B1                  |             | 313.061 > 285.1                  | 313.061 > 241.1                  |                             |                             |                                 |                                |
| aflatoxin B2                  |             | 315.074 > 287.2                  | 315.074 > 259.1                  |                             |                             |                                 |                                |
| aflatoxin G1                  |             | 329.055 > 243.2                  | 329.055 > 311.1                  |                             |                             |                                 |                                |
| aflatoxin G2                  |             | 331.057 > 313.0                  | 331.057 > 245.2                  |                             |                             |                                 |                                |
| deoxynivalenol                |             | 297.097 > 249.1                  | 297.097 > 203.2                  |                             |                             |                                 |                                |
| fumonisin B1                  |             | 722.316 > 704.3                  | 722.316 > 334.4                  |                             |                             |                                 |                                |
| fumonisin B2                  |             | 706.309 > 354.3                  | 706.309 > 336.1                  |                             |                             |                                 |                                |
| HT-2 toxin                    |             | 442.257 > 263.102                | 442.257 > 215.102                |                             |                             |                                 |                                |
| ochratoxin A                  |             | 404.092 > 239.0                  | 404.092 > 358.1                  |                             |                             |                                 |                                |
| T-2 toxins                    |             | 484.3 > 215.2                    | 484.3 > 185.1                    |                             |                             |                                 |                                |
| zearalenone                   |             | 317.1 > 131.1                    | 317.1 > 175.0                    |                             |                             |                                 |                                |
| <b>Mycotoxins (voluntary)</b> |             |                                  |                                  |                             |                             |                                 |                                |
| 15-acetyl-deoxynivalenol      |             | 339.1 > 321.3                    | 339.1 > 261.1                    |                             |                             |                                 |                                |
| 3-acetyl-deoxynivalenol       |             | 397.3 > 59.2                     | 397.3 > 307.1                    |                             |                             |                                 |                                |
| alternariol                   |             | 256.957 > 213.0                  | 256.957 > 215.0                  |                             |                             |                                 |                                |
| beauvericin                   |             | 801.287 > 784.3                  | 801.287 > 244.1                  |                             |                             |                                 |                                |
| deoxynivalenol-3-glucoside    |             |                                  |                                  |                             |                             |                                 |                                |
| enniatin A                    |             | 699.386 > 682.4                  | 699.386 > 210.2                  |                             |                             |                                 |                                |
| enniatin A1                   |             | 685.36 > 668.5                   | 685.36 > 210.1                   |                             |                             |                                 |                                |
| enniatin B                    |             | 657.319 > 640.3                  | 657.319 > 196.1                  |                             |                             |                                 |                                |
| enniatin B1                   |             | 671.317 > 654.4                  | 671.317 > 196.1                  |                             |                             |                                 |                                |
| fumonisin B3                  |             |                                  |                                  |                             |                             |                                 |                                |
| moniliformin                  |             | 96.946 > 41.2                    |                                  |                             |                             |                                 |                                |
| nivalenol                     |             | 371.094 > 281.1                  | 371.094 > 59.1                   |                             |                             |                                 |                                |
| ochratoxin B                  |             | 370.08 > 205.0                   | 370.08 > 187.1                   |                             |                             |                                 |                                |

**Table S21:** Lab 009 method information

| Scope                         | LOQ<br>(µg/kg) | Quantifier<br>transition(m/z<br>> m/z) | Qualifier<br>transition<br>(m/z > m/z) | Pig<br>Feed<br>Recover<br>y<br>value (%) | Soy<br>Bean<br>Recover<br>y<br>value (%) | Chicken<br>Feed<br>Recovery<br>value (%) | Corn<br>Gluten<br>Recovery<br>value (%) |
|-------------------------------|----------------|----------------------------------------|----------------------------------------|------------------------------------------|------------------------------------------|------------------------------------------|-----------------------------------------|
| <b>Mycotoxins (mandatory)</b> |                |                                        |                                        |                                          |                                          |                                          |                                         |
| aflatoxin B1                  | 0.5            | 313 > 285                              | 313 > 241                              |                                          |                                          | 84                                       |                                         |
| aflatoxin B2                  | 0.5            | 315 > 287                              | 315 > 259                              |                                          |                                          | 84                                       |                                         |
| aflatoxin G1                  | 0.5            | 329 > 243                              | 329 > 200                              |                                          |                                          | 85                                       |                                         |
| aflatoxin G2                  | 0.5            | 331 > 313                              | 331 > 189                              |                                          |                                          | 78                                       |                                         |
| deoxynivalenol                | 100            | 355 > 265                              | 355 > 295                              |                                          |                                          | 72                                       |                                         |
| fumonisin B1                  | 50             | 722 > 334                              | 722 > 352                              |                                          |                                          | 88                                       |                                         |
| fumonisin B2                  | 50             | 706 > 336                              | 706 > 318                              |                                          |                                          | 94                                       |                                         |
| HT-2 toxin                    | 10             | 442 > 263                              | 442 > 215                              |                                          |                                          | 79                                       |                                         |
| ochratoxin A                  | 1              | 404 > 239                              | 404 > 102                              |                                          |                                          | 84                                       |                                         |
| T-2 toxins                    | 1              | 484 > 305                              | 484 > 185                              |                                          |                                          | 92                                       |                                         |
| zearalenone                   | 0.5            | 317 > 175                              | 317 > 131                              |                                          |                                          | 82                                       |                                         |
| <b>Mycotoxins (voluntary)</b> |                |                                        |                                        |                                          |                                          |                                          |                                         |
| 15-acetyl-deoxynivalenol      | 25             | 356 > 137                              | 356 > 321                              |                                          |                                          | 80                                       |                                         |
| 3-acetyl-deoxynivalenol       | 25             | 397 > 59                               | 397 > 337                              |                                          |                                          | 93                                       |                                         |
| alternariol                   | 0.5            | 257 > 213                              | 257 > 215                              |                                          |                                          | 91                                       |                                         |
| beauvericin                   | 2.5            | 801 > 784                              | 801 > 262                              |                                          |                                          | 71                                       |                                         |
| deoxynivalenol-3-glucoside    | 100            | 517 > 457                              | 517 > 427                              |                                          |                                          | 30                                       |                                         |
| enniatin A                    | 0.5            | 699 > 210                              | 699 > 228                              |                                          |                                          | 92                                       |                                         |
| enniatin A1                   | 0.5            | 685 > 210                              | 685 > 214                              |                                          |                                          | 90                                       |                                         |
| enniatin B                    | 0.5            | 657 > 196                              | 657 > 214                              |                                          |                                          | 90                                       |                                         |
| enniatin B1                   | 0.5            | 671 > 214                              | 671 > 228                              |                                          |                                          | 90                                       |                                         |
| fumonisin B3                  | 50             | 706 > 336                              | 706 > 318                              |                                          |                                          | 74                                       |                                         |
| moniliformin                  |                |                                        |                                        |                                          |                                          |                                          |                                         |
| nivalenol                     | 100            | 371 > 281                              | 371 > 311                              |                                          |                                          | 72                                       |                                         |
| ochratoxin B                  | 0.5            | 370 > 205                              | 370 > 187                              |                                          |                                          | 91                                       |                                         |



**Table S22:** Lab 010 method information

| Scope                         | LOQ<br>(µg/kg) | Exact mass<br>m/z<br>(precursor) | Exact mass<br>m/z<br>(fragment) | Pig<br>Feed<br>Recovery<br>value (%) | Soy<br>Bean<br>Recovery<br>value (%) | Chicken<br>Feed<br>Recovery<br>value (%) | Corn<br>Gluten<br>Recovery<br>value (%) |
|-------------------------------|----------------|----------------------------------|---------------------------------|--------------------------------------|--------------------------------------|------------------------------------------|-----------------------------------------|
| <b>Mycotoxins (mandatory)</b> |                |                                  |                                 |                                      |                                      |                                          |                                         |
| aflatoxin B1                  | 0.5            | 313.0706646                      | 241.0495353                     |                                      |                                      | 82                                       |                                         |
| aflatoxin B2                  | 0.5            | 315.0863146                      | 259.0600999                     |                                      |                                      | 83                                       |                                         |
| aflatoxin G1                  | 0.5            | 329.0655792                      | 215.0702707                     |                                      |                                      | 80                                       |                                         |
| aflatoxin G2                  | 0.5            | 331.0812292                      | 245.0808354                     |                                      |                                      | 77                                       |                                         |
| deoxynivalenol                | 50             | 355.1398409                      | 265.1081469                     |                                      |                                      | 73                                       |                                         |
| fumonisin B1                  | 50             | 722.3957464                      | 334.3104414                     |                                      |                                      | 99                                       |                                         |
| fumonisin B2                  | 50             | 706.4008318                      | 336.3260915                     |                                      |                                      | 101                                      |                                         |
| HT-2 toxin                    | 1              | 442.2435435                      | 263.1277856                     |                                      |                                      | 86                                       |                                         |
| ochratoxin A                  | 1              | 404.0895415                      | 358.0840622                     |                                      |                                      | 84                                       |                                         |
| T-2 toxins                    | 0.5            | 484.2541081                      | 305.1383502                     |                                      |                                      | 83                                       |                                         |
| zearalenone                   | 0.5            | 317.139447                       | 131.0502382                     |                                      |                                      | 84                                       |                                         |
| <b>Mycotoxins (voluntary)</b> |                |                                  |                                 |                                      |                                      |                                          |                                         |
| 15-acetyl-deoxynivalenol      | 5              | 356.1703786                      | 339.1438295                     |                                      |                                      | 72                                       |                                         |
| 3-acetyl-deoxynivalenol       | 10             | 397.1504056                      | 59.0138                         |                                      |                                      | 90                                       |                                         |
| alternariol                   | 0.5            | 257.0455467                      | 215.034982                      |                                      |                                      | 82                                       |                                         |
| beauvericin                   | 1              | 801.4433058                      | 244.1332053                     |                                      |                                      | 84                                       |                                         |
| deoxynivalenol-3-glucoside    | 50             | 517.1926642                      | 427.1609702                     |                                      |                                      | 30                                       |                                         |
| enniatin A                    | 1              | 699.490256                       | 210.1488554                     |                                      |                                      | 90                                       |                                         |
| enniatin A1                   | 2.5            | 685.474606                       | 668.4480569                     |                                      |                                      | 87                                       |                                         |
| enniatin B                    | 0.5            | 657.4433058                      | 196.1332053                     |                                      |                                      | 89                                       |                                         |
| enniatin B1                   | 0.5            | 671.4589559                      | 196.1332053                     |                                      |                                      | 85                                       |                                         |
| fumonisin B3                  | 50             | 706.4008318                      | 336.3260915                     |                                      |                                      | 100                                      |                                         |
| moniliformin                  |                |                                  |                                 |                                      |                                      |                                          |                                         |
| nivalenol                     | 25             | 371.1347555                      | 281.1030615                     |                                      |                                      | 71                                       |                                         |
| ochratoxin B                  | 0.5            | 370.1285                         | 205.0495                        |                                      |                                      | 88                                       |                                         |
